# Supplementary material for: Chemo-enzymatic synthesis of chiral 3-substituted tetrahydroquinolines by a sequential biocatalytic cascade and Buchwald–Hartwig cyclization
Source: Royal Society of Chemistry journal article supplement (doi:10.1039/d3gc00047h), 2023-01-01
Supplement: d3gc00047h1.pdf [file d3gc00047h1.pdf]

## Supporting Information

### **Chemo-enzymatic synthesis of chiral 3-substituted tetrahydroquinolines by sequential biocatalytic cascade and Buchwald-Hartwig cyclization**

Zefei Xu, Jinhui Feng, Peiyuan Yao\*, Qiaqing Wu\*, and Dunming Zhu\*

National Center of Technology Innovation for Synthetic Biology, National Engineering Research Center of Industrial Enzymes and Tianjin Engineering Research Center of Biocatalytic Technology, Tianjin Institute of Industrial Biotechnology, Chinese Academy of Sciences. 32 Xi Qi Dao, Tianjin Airport Economic Area, Tianjin 300308, China

## Table of Content

|                                                                             |    |
|-----------------------------------------------------------------------------|----|
| S1. Experimental Procedures .....                                           | 3  |
| S2. Results and Discussion.....                                             | 6  |
| S2.1 Supplementary tables .....                                             | 6  |
| S2.2 Supplementary figures.....                                             | 13 |
| S2.3 Sequence information.....                                              | 15 |
| S2.4 Crystallographic information .....                                     | 16 |
| S2.5 NMR data, mass spectrum data and optical rotation of the products..... | 24 |
| S2.6 NMR spectra of products.....                                           | 31 |
| S2.7 HPLC spectra .....                                                     | 68 |
| S2.8 GC spectra.....                                                        | 71 |
| S3. References .....                                                        | 75 |

## S1. Experimental Procedures

### S1.1 Materials

3-methyl-1,2,3,4-tetrahydroquinoline was purchased from Shanghai Yuanye Bio-Technology Co., Ltd. Terrific Broth was purchased from Sangon Biotech (Shanghai) Co., Ltd. Ampicilin and kanamycin were purchased from Beijing Probe Bioscience Co., Ltd. Isopropyl  $\beta$ -D-1-thiogalactopyranoside (IPTG) was purchased from AMRESCO Inc. Other commercial chemicals were purchased from Shanghai Acme Biochemical Co., Ltd and Bide Pharmatech Co., Ltd.  $^1\text{H}$  and  $^{13}\text{C}$  NMR spectra were recorded on a Bruker Avance III 400 MHz NMR spectrometer. The samples were analyzed by an Agilent 1200 Series HPLC System equipped with a DAD detector. Chiral HPLC columns were Daicel CHIRALPAK OD-H column (250 mm x 4.6 mm, 5  $\mu\text{m}$ ), IC column (250 mm x 4.6 mm, 5  $\mu\text{m}$ ), OJ-H column (250 mm x 4.6 mm, 5  $\mu\text{m}$ ) and AS-H column (250 mm x 4.6 mm, 5  $\mu\text{m}$ ). GC analysis was performed on an Agilent 7890A Series GC System with Agilent DB-5 column (300 mm x 0.25 mm x 0.25 mm). The specific rotation of the chiral products were determined by Anton Paar MCP 500. High-resolution mass spectrometry (HRMS) was carried out with Bruker Metabolic Profiler (Agilent 1200 - Sprak Prospekt2 - Bruker AVANCE III 600MHz / Bruker micrOTOF-Q II).

### S1.2 Expression of recombinant Ene reductases (EREDs) and imine reductases (IREDs)

The genes of the EREDs (**Table S1**) were all synthesized by General Biosystems (General Biosystems (Anhui) Co. Ltd.) and further cloned into the *NdeI/XhoI* sites of pET21a, and the resulting plasmids were transformed into *E. coli* BL21 (DE3) for overexpression. The genes of the IREDs (**Table S2**) were cloned into the *NdeI/EcoRI* sites of pET28a, and the resulting plasmids pET28a-IR2-48 were transformed into *E. coli* BL21 (DE3) for overexpression of N-terminal 6xHis-tagged fusion proteins. The recombinant cells were cultivated in TB medium containing 100  $\mu\text{g}/\text{ml}$  ampicilin or 50  $\mu\text{g}/\text{ml}$  kanamycin at 37°C with shaking at 220 rpm until  $\text{OD}_{600\text{ nm}}$  reached 0.6–0.8, and then the gene expression was induced by 0.1 mM isopropyl  $\beta$ -D-1-thiogalactopyranoside (IPTG) at 25°C for 20 h. The cells were harvested by centrifugation (6000 *g*, 10 min, 4°C), washed once by sodium phosphate buffer (100 mM, pH 7.5) and stored at -20°C for further use.

### S1.3 Screening of EREDs towards **2a** with cell-free extracts of enzymes

The reaction mixture contained 40 mM **2a**, 10% v/v DMSO, 80 mM D-glucose, 3 U/mL GDH, 0.6 mM NADP<sup>+</sup>, cell-free extracts of EREDs (50 mg wet weight) in 1.0 mL sodium phosphate buffer (100 mM, pH 7.5). The reaction mixtures were incubated at 25°C with shaking at 200 rpm for 2 h, and then extracted with 1.0 mL petroleum ether / ethyl acetate (90/10). The organic extracts were dried over anhydrous sodium sulphate and analyzed by GC to measure conversion (Agilent DB-5 column, GC condition: DB-5 column (300 mm x 0.25 mm x 0.25 mm), 100°C for 0 min, 2°C/min rise to 200 °C). The product **3a** was then reduced by sodium borohydride to get alcohol **3a'**, which was then tested for *ee* values by HPLC on chiral stationary phase. The racemate of **3a'** was obtained using N8-2 from *Pseudomonas putida* with low stereoselectivity (16%).

### S1.4 Preparative scale reduction of **2a** and absolute configuration confirmation

The reaction mixture contained 20 mM **2a**, 10% v/v DMSO, 40 mM D-glucose, 3 U/mL GDH, 0.6 mM NADP<sup>+</sup>, 0.5 mg/mL purified OYE1 in 50 mL sodium phosphate buffer (100 mM, pH 7.5). The reaction mixtures were incubated at 25°C with shaking at 200 rpm. During the reaction, 1 mL portions of the reaction mixture were taken at some time intervals to determine conversion and *ee* values (**Figure S1**).

After 18 h, Sodium borohydride (2 eq.) was added in the reaction mixture, which was then extracted with petroleum ether / ethyl acetate (90/10). The organic phase was concentrated via evaporation under reduced pressure and then purified by column chromatography. The absolute configuration of **3a'** was assigned by comparison with the sign of specific rotation of (*S*)-2-methyl-3-phenylpropanal obtained using OYE2 (99.75% identity with OYE1) in literature.<sup>1</sup> The specific rotation of (*S*)-**3a'** (93%*ee*) obtained using OYE1 and (*S*)-2-methyl-3-phenylpropanal (96%*ee*) in ref.[1] were -3.850 and -11.3 (*c*=1.0, CHCl<sub>3</sub>, 589 nm, 20°C), respectively.

### S1.5 Screening of IREDs towards **3a** with cell-free extracts of enzymes

First, the reaction mixture contained 20 mM **2a**, 10% v/v DMSO, 40 mM glucose, 3 U/mL GDH, 0.6 mM NADP<sup>+</sup> in 0.5 mL sodium phosphate buffer (100 mM, pH 7.5) and was shaken at 25°C, 200 rpm for 18 h to achieve >99% conversion without formation of **3a'**. Then the pH of reaction mixtures were adjusted from 6.4 to 7.5 with saturated sodium carbonate solution and 0.5 mL buffer containing allylamine (80 mM), glucose (80 mM), GDH (6 U/mL), NADP<sup>+</sup> (1.2 mM) and cell-free extracts (100 mg wet cells weight per mL) of IREDs was added, and the reaction proceeded at 25°C, 200 rpm for 18 h. The reaction was quenched by the addition of saturated sodium carbonate solution and extracted with 1.0 mL petroleum

ether / ethyl acetate (90/10). The organic extracts were dried over anhydrous sodium sulphate and analyzed by HPLC on chiral stationary phase to measure *ee* values of the products (**Table S3**).

The racemization of (*S*)-**3a** from the reduction of **2a** with OYE1 was studied under different reaction conditions. The pH of the reaction mixture of **2a** with OYE1 was adjusted to pH 7.5 at the end of the reaction. The pH of the reaction mixture of **2a** with OYE1 was adjusted to pH 7.5 and 2eq. allylamine was added. The resulting mixtures and the reaction mixture (pH 6.4) of **2a** with OYE1 were shaken at 25 °C, 200 rpm for 5 h. The product **3a** was then reduced by sodium borohydride to get alcohol **3a'**, which was then tested for *ee* values by HPLC on chiral stationary phase.

### S1.6 Purification and activity assay of the selected IREDs and EREDs

Recombinant *E. coli* cells expressing IR43, IR97 and OYE1 were harvested by centrifugation and the pellets were resuspended in sodium phosphate buffer (100 mM, pH 7.5). The cells were lysed by ultrasonication and then the cell debris was removed by centrifugation (10000 *g*, 20 min, 4 °C). The resulting clarified lysate was loaded onto a 5 or 40 mL column charged with 0.1 M nickel sulfate and protein was eluted using an increasing gradient of imidazole from 20 to 500 mM at a flow rate of 3 mL/min. After being analyzed by SDS-PAGE (**Figure S2**), the pure protein was collected and dialyzed by desalting column, then concentrated by ultrafiltration and stored at -80 °C with 10% glycerol for further use. The activities of IREDs and EREDs were determined using purified enzyme on a SpectraMax M5 microplate reader (Molecular Devices) by monitoring the decrease of NADPH at 340 nm ( $\epsilon = 6220 \text{ L M}^{-1}\text{cm}^{-1}$ ) at 30 °C. The reaction volume (200  $\mu\text{L}$ ) of OYE1 contained a certain amount of purified enzyme, 0.3 mM NADPH, 1 mM **2a-2j**, 10% DMSO and sodium phosphate buffer (100 mM, pH 7.5). The reaction volume (200  $\mu\text{L}$ ) of IR43 and IR97 contained a certain amount of purified enzyme, 0.3 mM NADPH, 10 mM **3a-3j** obtained by OYE1 catalyzed reduction of **2a-2j** without separated, 20 mM allylamine, 10% v/v DMSO and sodium phosphate buffer (100 mM, pH 7.5). The reaction was initiated by adding the enzyme to the mixture. One unit of enzyme is defined as the amount of protein that oxidizes 1  $\mu\text{mol}$  NADPH per minute.

### S1.7 Synthesis of $\alpha$ , $\beta$ -unsaturated aldehyde **2a-2j**

**2a-2j** were synthesized according to the methods reported in the literature.<sup>2</sup> They were prepared from 2-bromobenzaldehyde (**1a**), 2-chlorobenzaldehyde (**1b**), 2-bromo-3-fluorobenzaldehyde (**1c**), 2-bromo-4-fluorobenzaldehyde (**1d**), 2-bromo-5-fluorobenzaldehyde (**1e**), 2-bromo-6-fluorobenzaldehyde (**1f**), 2-bromo-3-methylbenzaldehyde (**1g**), 2-bromo-4-methylbenzaldehyde (**1h**), 3-bromothiophene-2-carbaldehyde (**1i**) and 3-bromofuran-2-carbaldehyde (**1j**) (**Figure S3**). As described in the literature, a mixture of **1a-1j** (5-50 mmol), sodium hydroxide (0.2-2 mL, 10% aq.) in MeOH was cooled to 0 °C, to which propionaldehyde (1.5 eq.) was added dropwise and the resulting mixture was stirred at room temperature for 24 h. The reaction mixture was quenched with conc. aqueous HCl, followed by extractive workup with *tert*-butyl methyl ether. The extracts were dried, concentrated, and the crude products were purified by flash column chromatography on silica gel (petroleum ether / ethyl acetate=100:1) to afford the aldehyde **2a-2j**.

### S1.8 One-pot biocatalytic cascade reduction and reductive amination

The biotransformation was performed starting from 20 mM  $\alpha$ ,  $\beta$ -unsaturated aldehyde (**2a-2j**), 40 mM allylamine, 60 mM D-glucose, 1.2 mM NADP<sup>+</sup>, 5 U/mL GDH and 0.5 mg/mL purified OYE1 and 1-10 mg/mL IR43 in sodium phosphate buffer (1 mL, 100 mM, pH 7.5) containing 10% DMSO (v/v). The reactions were shaken at 25 °C with 200 rpm within 14 h. Then, the reaction was quenched by adding saturated sodium carbonate solution (100  $\mu\text{L}$ ) and extracted with ethyl acetate (1 mL). Conversions were determined by GC-FID analysis (Agilent DB-5 column, GC condition: DB-5 column (300 mm x 0.25 mm x 0.25 mm), 50 °C for 0 min, 10 °C/min rise to 200 °C, 5 min.).

For the preparative scale one-pot biocatalytic cascade reaction, the reaction mixture containing 20 mM  $\alpha$ ,  $\beta$ -unsaturated aldehyde (**2a-2j**), 40 mM allylamine, 60 mM D-glucose, 1.2 mM NADP<sup>+</sup>, 5 U/mL GDH and 0.5 mg/mL purified OYE1 and 1-8 mg/mL IR43 in sodium phosphate buffer (100 mM, pH 7.5) with 10% DMSO (v/v) was incubated at 25 °C. The volume of **2a-2j** was 50 mL, and a 500 mL reaction of **2a** was carried out under the same conditions (time course shown in **Figure S4**). The reaction was stopped by adding saturated sodium carbonate solution. The reaction mixtures were extracted with a co-solvent of petroleum ether / ethyl acetate (90/10). The organic phase was concentrated via evaporation under reduced pressure and then purified by column chromatography (silica gel, DCM/MeOH=98:2) to afford products **4a-4j**. The products were confirmed using NMR analysis.

### S1.9 Synthesis of racemate of **4a-4j**

In order to determine the *ee* value of the product **4a-4j**, we synthesized the corresponding racemates. As shown in **Figure S5**, **3a-3j** were obtained from **2a-2j** by enzyme reduction firstly. Then, a mixture of **3a-3j**, allylamine (2 eq.), anhydrous sodium sulfate and sodium carbonate in MeOH/DCM was at room temperature for 12 h, to which NaBH<sub>4</sub> (2 eq.) was added and stirred for 0.5 h. The reaction mixture was quenched with water, followed by extracted with ethyl acetate. The

extracts were dried and concentrated, and the crude products were purified by flash column chromatography on silica gel, or added 4.0 M hydrogen chloride solution in dioxane (1.5 eq.) and then isolated by filtration. They were confirmed using NMR analysis.

#### S1.10 Synthesis of 6a-6j

A mixture of **4a-4j**, Pd(OAc)<sub>2</sub> (0.1 eq.), 2-di-*tert*-butylphosphino-2',4',6'-triisopropylbiph (*t*-butylXPhos, 0.2 eq.) and sodium *tert*-butoxide (3 eq.) in 1,4-dioxane was stirred at 110°C for 6 h, and then concentrated via evaporation under reduced pressure. Next, 5% Pd/C was used to remove the allyl group at 80°C for 6 h. The mixture was filtered and concentrated by rotary evaporator. The crude product was dissolved in water with pH 1.0 and extracted with *tert*-butyl methyl ether to remove the impurity. And then, the aqueous solution was adjusted to pH 9.0 and extracted with *tert*-butyl methyl ether again to get the products. They were purified by adding 4.0 M hydrogen chloride solution in dioxane (1.5 eq.) and then isolated by filtration.

#### S1.11 Analytical methods

The *ee* value of product **3a'** was measured via HPLC with Daicel CHIRALPAK OH-H column. The absolute configurations of (*S*)-**4b** were determined by X-ray crystallographic analysis. The absolute configurations of other products **4a** and **4c-4i** were assigned by comparison the optical rotation with **4b**. The *ee* values of products **4a-4b** were measured via HPLC with Daicel CHIRALPAK IC and AS-H column after derivatization. The *ee* values of products **6a-6i** were measured via HPLC with Daicel CHIRALPAK OJ-H column. The detailed HPLC analytical conditions are shown in **Table S6**.

## S2. Results and Discussion

### S2.1 Supplementary tables

**Table S1.** Ene reductases used in this study.

| ERED   | Protein identifier | Organism                                 | Ref. |
|--------|--------------------|------------------------------------------|------|
| BFER   | WP_123917522.1     | <i>Bacillus sp. FJAT-42376</i>           | 3    |
| BpER   | WP_033496060.1     | <i>Bifidobacterium psychraerophilum</i>  | 3    |
| BzER   | WP_078061662.1     | <i>Bacillus zhangzhouensis</i>           | 3    |
| NdER   | XP_003668369.1     | <i>Naumovozyma dairenensis CBS 421</i>   | 3    |
| N8-2   | AHC69715.1         | <i>Pseudomonas putida</i>                | 3    |
| NtDBR  | Q9SLN8.1           | <i>Nicotiana tabacum</i>                 | 3    |
| OYE1   | CAA37666.1         | <i>Saccharomyces pastorianus</i>         | 3    |
| OYE2.6 | 4DF2_A             | <i>Scheffersomyces stipitis CBS 6054</i> | 3    |
| PKER   | WP_119883250.1     | <i>Paenisporsarcina sp. K2R23-3</i>      | 3    |
| ReER   | XP_013324131.1     | <i>Rasamsonia emersonii CBS 393.64</i>   | 3    |
| SeER   | XP_018218866.1     | <i>Saccharomyces eubayanus]</i>          | 3    |
| TvER   | KUL85056.1         | <i>Talaromyces verruculosus</i>          | 3    |
| YI-4ER | XP_499654.1        | <i>Yarrowia lipolytica CLIB122</i>       | 3    |
| YIER   | XP_500567.2        | <i>Yarrowia lipolytica CLIB122</i>       | 3    |
| YqjM   | BAA12619.1         | <i>Bacillus subtilis</i>                 | 3    |

**Table S2.** Imine reductases used in this study.

| IREd | Protein identifier | Organism                                        | Ref. |
|------|--------------------|-------------------------------------------------|------|
| IR19 | WP_023587323.1     | <i>Streptomyces thermolilacinus</i>             | 4    |
| IR20 | WP_027931121.1     | <i>Amycolatopsis thermoflava</i>                | 4    |
| IR21 | WP_073459042.1     | <i>Pseudonocardia thermophila</i>               | 4    |
| IR22 | WP_091804541.1     | <i>Prauserella marina</i>                       | 4    |
| IR23 | SHE96216.1         | <i>Streptoalloteichus hindustanus</i>           | 4    |
| IR24 | WP_020388085.1     | <i>Kribbella catacumbae</i>                     | 4    |
| IR25 | WP_088993565.1     | <i>Micromonospora echinaurantiaca</i>           | 4    |
| IR26 | WP_017622916.1     | <i>Nocardiopsis chromatogenes</i>               | 4    |
| IR27 | WP_095494073.1     | <i>Mesorhizobium temperatum</i>                 | 4    |
| IR28 | OXS04712.1         | <i>Aspergillus thermomutatus</i>                | 4    |
| IR29 | WP_057221059.1     | <i>Ensifer</i>                                  | 4    |
| IR30 | WP_020496004.1     | <i>Sciscionella marina</i>                      | 4    |
| IR31 | WP_044567941.1     | <i>Streptomyces iranensis</i>                   | 4    |
| IR32 | WP_020635634.1     | <i>Amycolatopsis alba</i>                       | 4    |
| IR33 | WP_018011194.1     | <i>Sinorhizobium medicae</i>                    | 4    |
| IR34 | WP_023720294.1     | <i>Mesorhizobium sp. LSHC420B00</i>             | 4    |
| IR35 | WP_015347361.1     | <i>Myxococcus stipitatus</i>                    | 4    |
| IR36 | WP_054311034.1     | <i>Mesorhizobium sp. 1M-11</i>                  | 4    |
| IR37 | WP_055997555.1     | <i>Devosia sp. Root413D1</i>                    | 4    |
| IR38 | WP_063893400.1     | <i>Sinorhizobium sp. Sb3</i>                    | 4    |
| IR39 | WP_069881969.1     | <i>Bosea sp. BIWAKO-01</i>                      | 4    |
| IR40 | WP_075097693.1     | <i>Sandaracinus amylolyticus</i>                | 4    |
| IR41 | WP_081250846.1     | <i>Rhizobium leguminosarum</i>                  | 4    |
| IR42 | WP_081734918.1     | <i>Mesorhizobium sp. L2C084A000</i>             | 4    |
| IR43 | WP_082312585.1     | <i>Chelatococcus sp. CO-6</i>                   | 4    |
| IR44 | WP_083347639.1     | <i>Rhizobium sp. LCM 4573</i>                   | 4    |
| IR45 | WP_083948736.1     | <i>Aminobacter aminovorans</i>                  | 4    |
| IR46 | WP_086088856.1     | <i>Pseudorhodoplanes sinuspersici</i>           | 4    |
| IR47 | WP_086800502.1     | <i>Streptomyces scabiei</i>                     | 4    |
| IR48 | WP_088133675.1     | <i>Vibrio gazogenes</i>                         | 4    |
| IR49 | WP_091185118.1     | <i>Paenibacillus catalpae]</i>                  | 4    |
| IR50 | WP_097622187.1     | <i>Rhizobium sp. L43</i>                        | 4    |
| IR51 | WP_074958336.1     | <i>Myxococcus fulvus</i>                        | 3    |
| IR52 | WP_028649287.1     | <i>Nocardiopsis sp. CNT312</i>                  | 3    |
| IR53 | WP_024271000.1     | <i>Shinella sp. DD12</i>                        | 3    |
| IR54 | WP_077961001.1     | <i>Ensifer adhaerens</i>                        | 3    |
| IR55 | WP_119269405.1     | <i>Phyllobacteriaceae bacterium SYSU D60010</i> | 3    |
| IR56 | WP_095484516.1     | <i>Mesorhizobium mediterraneum</i>              | 3    |
| IR57 | WP_112810862.1     | <i>Rhizobiales bacterium</i>                    | 3    |
| IR58 | WP_036254014.1     | <i>Mesorhizobium</i>                            | 3    |
| IR59 | WP_105371846.1     | <i>Neorhizobium huautlense</i>                  | 3    |
| IR60 | WP_014652774.1     | <i>Paenibacillus mucilaginosus</i>              | 3    |
| IR61 | WP_053204479.1     | <i>Jiangella muralis</i>                        | 3    |
| IR62 | WP_073934314.1     | <i>Streptomyces sp. CB02400</i>                 | 3    |

| IREID | Protein identifier | Organism                                | Ref.      |
|-------|--------------------|-----------------------------------------|-----------|
| IR63  | WP_101830390.1     | <i>Frankia canadensis</i>               | 3         |
| IR64  | WP_106402132.1     | <i>Actinocorallia populi</i>            | 3         |
| IR65  | WP_107269705.1     | <i>Plantactinospora sp. BC1</i>         | 3         |
| IR66  | WP_054288132.1     | <i>Kibdelosporangium phytohabitans</i>  | 3         |
| IR67  | WP_107099103.1     | <i>Streptomyces kanamyceticus</i>       | 3         |
| IR68  | WP_014910993.1     | <i>Nocardioopsis alba</i>               | 3         |
| IR69  | WP_015610874.1     | <i>Streptomyces sp. GF3587</i>          | 3         |
| IR70  | AKU97888.1         | <i>Labilithrix luteola</i>              | 3         |
| IR71  | WP_030568324.1     | <i>Streptomyces cyaneofuscatus</i>      | 3         |
| IR72  | WP_034851031.1     | <i>Inquilinus limosus</i>               | 3         |
| IR73  | WP_042336938.1     | <i>Paraburkholderia ferrariae</i>       | 3         |
| IR74  | WP_067485233.1     | <i>Actinomadura hibisca</i>             | 3         |
| IR75  | WP_099935863.1     | <i>Streptomyces sp. 1121.2</i>          | 3         |
| IR76  | WP_104983023.1     | <i>Sorangium cellulosum</i>             | 3         |
| IR77  | WP_138891787.1     | <i>Mycobacterium sp. KBS0706</i>        | 3         |
| IR78  | WP_140797783.1     | <i>Myxococcus xanthus</i>               | 3         |
| IR79  | WP_116949466.1     | <i>Jiangella sp. KE2-3</i>              | 3         |
| IR80  | WP_069109858.1     | <i>Jiangella alba</i>                   | 3         |
| IR81  | WP_051581142.1     | <i>Pseudonocardia acaciae</i>           | 3         |
| IR82  | WP_129662656.1     | <i>Phytoactinopolyspora endophytica</i> | 3         |
| IR83  | WP_043636194.1     | <i>Nonomuraea candida</i>               | 3         |
| IR84  | WP_030269222.1     | <i>Micromonospora globosa</i>           | 3         |
| IR85  | WP_088833824.1     | <i>Paenibacillus elgii</i>              | 3         |
| IR86  | WP_007130043.1     | <i>Paenibacillus lactis</i>             | 3         |
| IR87  | WP_000739166.1     | <i>Bacillus cereus</i>                  | 3         |
| IR88  |                    | Metagenome (pIR23)                      | [5]       |
| IR89  |                    | Metagenome (pIR106)                     | 5         |
| IR90  |                    | Metagenome (pIR117)                     | 5         |
| IR91  |                    | Metagenome (pIR124)                     | 5         |
| IR92  |                    | Metagenome (pIR125)                     | 5         |
| IR93  |                    | Metagenome (pIR258)                     | 5         |
| IR94  |                    | Metagenome (pIR271)                     | 5         |
| IR95  |                    | Metagenome (pIR325)                     | 5         |
| IR96  |                    | Metagenome (pIR338)                     | 5         |
| IR97  |                    | Metagenome (pIR355)                     | 5         |
| IR98  |                    | Metagenome (pIR357)                     | 5         |
| IR99  |                    | Metagenome (pIR358)                     | 5         |
| IR100 |                    | Metagenome (pIR361)                     | 5         |
| IR101 | WP_016642458.1     | <i>Streptomyces aurantiacus</i>         | this work |
| IR102 | WP_018958930.1     | <i>Streptomyces sp. CNB091</i>          | this work |
| IR103 | WP_055528718.1     | <i>Streptomyces alboniger</i>           | this work |
| IR104 | WP_078965966.1     | <i>Streptomyces aureocirculatus</i>     | this work |
| IR105 | WP_079183168.1     | <i>Streptomyces sp. TSRI0281</i>        | this work |
| IR106 | WP_138049834.1     | <i>Streptomyces sp. NEAU-C151</i>       | this work |
| IR107 | WP_141327527.1     | <i>Myxococcus sp. AB025B</i>            | 6         |



| IREID | Protein identifier | Organism                               | Ref.      |
|-------|--------------------|----------------------------------------|-----------|
| IR108 | PAQ05110.1         | <i>Mesorhizobium temperatum</i>        | this work |
| IR109 | WP_163868876.1     | <i>Myxococcus sp. AB053B]</i>          | this work |
| IR110 | WP_120641842.1     | <i>Corallococcus llansteffanensis</i>  | 6         |
| IR111 | WP_164011897.1     | <i>Pyxidicoccus sp. AB060A</i>         | 6         |
| IR112 | WP_040456307.1     | <i>Hoeflea sp. 108</i>                 | this work |
| IR113 | WP_095520326.1     | <i>Mesorhizobium wenziniae</i>         | this work |
| IR114 | WP_098285697.1     | <i>Bacillus thuringiensis</i>          | this work |
| IR115 | WP_099476364.1     | <i>Paenibacillus ihbetae</i>           | this work |
| IR116 | WP_103964206.1     | <i>Nonomuraea solani</i>               | this work |
| IR117 | WP_078076200.1     | <i>Streptomyces niveus</i>             | this work |
| IR118 | WP_125753405.1     | <i>Streptomyces sp. WAC01280</i>       | this work |
| IR119 | WP_093151256.1     | <i>Saccharopolyspora antimicrobica</i> | this work |
| IR120 | WP_073866103.1     | <i>Streptomyces sp. CB00072</i>        | this work |
| IR121 | WP_067986728.1     | <i>Nocardia caishijiensis</i>          | this work |
| IR122 | WP_145871342.1     | <i>Streptomyces capillispiralis</i>    | this work |
| IR123 | WP_091052229.1     | <i>Nocardioides sp. YR527</i>          | this work |
| IR124 | WP_146646629.1     | <i>Labilithrix luteola</i>             | this work |
| IR125 | WP_120779582.1     | <i>Micromonospora costii</i>           | this work |
| IR126 | WP_132118896.1     | <i>Actinocrispum wychmicini</i>        | this work |
| IR127 | WP_149853273.1     | <i>Goodfellowiella sp. AN110305</i>    | this work |
| IR128 | WP_072027084.1     | <i>Amycolatopsis keratiniphila</i>     | this work |
| IR129 | WP_091804538.1     | <i>Prauserella marina</i>              | this work |
| IR130 | WP_143226941.1     | <i>Actinomadura mexicana</i>           | this work |
| IR131 | WP_206806895.1     | <i>Amycolatopsis sp. 195334CR</i>      | 6         |
| IR132 | WP_033436765.1     | <i>Saccharothrix sp. NRRL B-16314</i>  | 6         |
| IR133 | WP_187341554.1     | <i>Olivibacter sp. SDN3</i>            | 6         |
| IR134 | WP_084429349.1     | <i>Kibdelosporangium aridum</i>        | this work |
| IR135 | WP_020660865.1     | <i>Amycolatopsis benzoatilytica</i>    | this work |
| IR136 | WP_200314139.1     | <i>Prauserella sp. ASG 168</i>         | this work |
| IR137 | WP_132480478.1     | <i>Saccharopolyspora sp. 7K502</i>     | this work |
| IR138 | WP_189027275.1     | <i>Nocardia rhizosphaerihabitans</i>   | this work |
| IR139 | WP_196417197.1     | <i>Actinoplanes sp. NEAU-A11</i>       | this work |
| IR140 | WP_204075250.1     | <i>Planotetrasporaphitsanulokensis</i> | this work |
| IR141 | WP_132237834.1     | <i>Promicromonospora sp. CF082</i>     | this work |
| IR142 | WP_132403551.1     | <i>Kribbella albertanoniae</i>         | this work |
| IR143 | WP_062650298.1     | <i>Streptomyces sp. NBRC 110468</i>    | this work |
| IR144 | WP_183655192.1     | <i>Nonomuraea dietziae</i>             | this work |
| IR145 | WP_067828057.1     | <i>Actinomadura kijaniata</i>          | this work |
| IR146 | WP_055602427.1     | <i>Streptomyces aureus</i>             | this work |
| IR147 | WP_205083603.1     | <i>Streptomyces sp. RHZ10</i>          | this work |
| IR148 | WP_187063382.1     | <i>Streptomyces buecheriae</i>         | this work |
| IR149 | WP_063051984.1     | <i>Nocardia arthritis</i>              | this work |
| IR150 | WP_153033184.1     | <i>Amycolatopsis sp. YIM 10</i>        | this work |
| IR151 | WP_189213896.1     | <i>Actinokineospora fastidiosa</i>     | this work |
| IR152 | WP_156520327.1     | <i>Rhodococcus sp. EPR-157</i>         | this work |

| IREID | Protein identifier | Organism                             | Ref.      |
|-------|--------------------|--------------------------------------|-----------|
| IR153 | WP_100750305.1     | <i>Streptomyces</i>                  | this work |
| IR154 | WP_107462275.1     | <i>Streptomyces sp. MA5143a</i>      | this work |
| IR155 | WP_145827875.1     | <i>Streptomyces sp. T12</i>          | this work |
| IR156 | WP_164735421.1     | <i>Pseudoflavitalearhizosphaerae</i> | 6         |
| IR157 | WP_038700284.1     | <i>Sphingobacterium sp. ML3W</i>     | this work |
| IR158 | WP_057939766.1     | <i>Algoriphagus resistens</i>        | this work |
| IR159 | WP_187342350.1     | <i>Olivibacter sp. SDN3</i>          | this work |
| IR160 | WP_034685409.1     | <i>Chryseobacterium piperi</i>       | this work |
| IR161 | RYY25307.1         | <i>hitinophagaceae bacterium</i>     | this work |
| IR162 | WP_112745115.1     | <i>Chryseolinea flava</i>            | this work |
| IR163 | WP_205686912.1     | <i>Chitinophaga rhizosphaerae</i>    | this work |
| IR164 | WP_120257001.1     | <i>Sphingobacterium detergens</i>    | this work |
| IR165 | WP_201667602.1     | <i>Sphingobacterium multivorum</i>   | this work |
| IR166 | WP_028071301.1     | <i>Sphingobacterium thalophilum</i>  | this work |
| IR167 | MBA3677520.1       | <i>Sphingosinicella sp.</i>          | this work |
| IR168 | WP_174782375.1     | <i>Cupriavidus gilardii</i>          | 6         |
| IR169 | WP_161024548.1     | <i>Massiliaguangdongensis</i>        | 6         |
| IR170 | MBA2675896.1       | <i>Ramlibacter sp.</i>               | this work |
| IR171 | WP_069377993.1     | <i>Pedobacter steynii</i>            | this work |
| IR172 | WP_113619086.1     | <i>Chitinophaga flava</i>            | this work |
| IR173 | WP_187965108.1     | <i>Sinomicrobium sp. FJxs</i>        | this work |
| IR174 | WP_205760981.1     | <i>Luteolibacter luteus</i>          | 6         |
| IR175 | WP_126748102.1     | <i>Variovorax sp. DXTD-1</i>         | this work |

**Table S3.** *ee* values of the product **4a** obtained by IREDs.

| IREd  | <i>ee</i> %     |
|-------|-----------------|-------|-----------------|-------|-----------------|-------|-----------------|
| IR43  | 99 <sup>s</sup> | IR32  | 88 <sup>s</sup> | IR86  | 75 <sup>s</sup> | IR55  | 63 <sup>s</sup> |
| IR46  | 99 <sup>s</sup> | IR99  | 88 <sup>s</sup> | IR121 | 75 <sup>s</sup> | IR171 | 62 <sup>s</sup> |
| IR47  | 99 <sup>s</sup> | IR110 | 88 <sup>s</sup> | IR61  | 74 <sup>s</sup> | IR37  | 60 <sup>s</sup> |
| IR49  | 99 <sup>s</sup> | IR24  | 87 <sup>s</sup> | IR133 | 74 <sup>s</sup> | IR88  | 60 <sup>s</sup> |
| IR64  | 99 <sup>s</sup> | IR174 | 87 <sup>s</sup> | IR107 | 73 <sup>s</sup> | IR103 | 60 <sup>s</sup> |
| IR65  | 99 <sup>s</sup> | IR31  | 86 <sup>s</sup> | IR68  | 72 <sup>s</sup> | IR169 | 58 <sup>s</sup> |
| IR84  | 99 <sup>s</sup> | IR109 | 84 <sup>s</sup> | IR100 | 72 <sup>s</sup> | IR168 | 56 <sup>s</sup> |
| IR85  | 99 <sup>s</sup> | IR35  | 82 <sup>s</sup> | IR167 | 72 <sup>s</sup> | IR156 | 54 <sup>s</sup> |
| IR97  | 99 <sup>s</sup> | IR51  | 82 <sup>s</sup> | IR25  | 70 <sup>s</sup> | IR71  | 52 <sup>s</sup> |
| IR98  | 99 <sup>s</sup> | IR70  | 82 <sup>s</sup> | IR89  | 70 <sup>s</sup> | IR36  | 50 <sup>s</sup> |
| IR115 | 99 <sup>s</sup> | IR92  | 82 <sup>s</sup> | IR96  | 70 <sup>s</sup> | IR39  | 47 <sup>s</sup> |
| IR117 | 99 <sup>s</sup> | IR131 | 82 <sup>s</sup> | IR132 | 70 <sup>s</sup> | IR94  | 46 <sup>s</sup> |
| IR122 | 99 <sup>s</sup> | IR23  | 81 <sup>s</sup> | IR170 | 70 <sup>s</sup> | IR162 | 45 <sup>s</sup> |
| IR124 | 99 <sup>s</sup> | IR67  | 81 <sup>s</sup> | IR57  | 7 <sup>s</sup>  | IR79  | 40 <sup>s</sup> |
| IR134 | 99 <sup>s</sup> | IR161 | 81 <sup>s</sup> | IR21  | 68 <sup>s</sup> | IR45  | 34 <sup>s</sup> |
| IR149 | 99 <sup>s</sup> | IR40  | 80 <sup>s</sup> | IR38  | 68 <sup>s</sup> | IR166 | 32 <sup>s</sup> |
| IR155 | 99 <sup>s</sup> | IR93  | 80 <sup>s</sup> | IR44  | 68 <sup>s</sup> | IR30  | 30 <sup>s</sup> |
| IR62  | 98 <sup>s</sup> | IR159 | 80 <sup>s</sup> | IR58  | 68 <sup>s</sup> | IR54  | 30 <sup>s</sup> |
| IR77  | 98 <sup>s</sup> | IR130 | 79 <sup>s</sup> | IR76  | 68 <sup>s</sup> | IR74  | 28 <sup>s</sup> |
| IR160 | 97 <sup>s</sup> | IR56  | 78 <sup>s</sup> | IR66  | 66 <sup>s</sup> | IR102 | 13 <sup>s</sup> |
| IR50  | 95 <sup>s</sup> | IR111 | 78 <sup>s</sup> | IR78  | 66 <sup>s</sup> | IR19  | 1               |
| IR69  | 95 <sup>s</sup> | IR104 | 77 <sup>s</sup> | IR90  | 66 <sup>s</sup> | IR63  | 51 <sup>R</sup> |
| IR118 | 95 <sup>s</sup> | IR33  | 76 <sup>s</sup> | IR172 | 66 <sup>s</sup> | IR95  | 4 <sup>R</sup>  |
| IR128 | 95 <sup>s</sup> | IR20  | 75 <sup>s</sup> | IR175 | 65 <sup>s</sup> | IR105 | 43 <sup>R</sup> |
| IR26  | 92 <sup>s</sup> | IR60  | 75 <sup>s</sup> | IR27  | 64 <sup>s</sup> |       |                 |

**Table S4.** 1mL one-pot biocatalytic cascade reduction and reductive amination.

| Substrate | OYE1 | IR43 | Peak area percentage (%) |       |       |       |
|-----------|------|------|--------------------------|-------|-------|-------|
|           |      |      | 2a-2j                    | 3a-4j | Imine | 4a-4j |
| 2a        | 0.5  | 1    | <1                       | <1    | 14    | 86    |
| 2b        | 0.5  | 1    | <1                       | 7     | 23    | 69    |
| 2c        | 0.5  | 1    | <1                       | 3     | <1    | 97    |
| 2d        | 0.5  | 1    | <1                       | 21    | 37    | 43    |
|           | 0.5  | 4    | <1                       | 4     | 4     | 92    |
|           | 0.5  | 6    | <1                       | 2     | <1    | 98    |
| 2e        | 0.5  | 2    | 8                        | 27    | 38    | 27    |
|           | 0.5  | 4    | <1                       | 4     | 2     | 94    |
|           | 0.5  | 6    | <1                       | 2     | <1    | 98    |
| 2f        | 0.5  | 2    | <1                       | 23    | 13    | 64    |
|           | 0.5  | 8    | <1                       | 9     | 11    | 80    |
|           | 0.5  | 10   | <1                       | 2     | 2     | 96    |
| 2g        | 0.5  | 2    | <1                       | 38    | 56    | 6     |
|           | 0.5  | 8    | 5                        | 24    | 15    | 56    |
|           | 0.5  | 10   | 5                        | 19    | 12    | 64    |
| 2h        | 0.5  | 2    | <1                       | 19    | 22    | 59    |
|           | 0.5  | 8    | 6                        | 4     | 2     | 88    |
|           | 0.5  | 10   | 7                        | 2     | 2     | 89    |
| 2i        | 0.5  | 1    | 9                        | 7     | <1    | 84    |
| 2j        | 0.5  | 1    | 7                        | 3     | <1    | 90    |

**Table S5.** HPLC columns and conditions used for analysis of reaction samples.

| Product           | Column | Wavelength (nm) | Flow (mL/min) | <i>n</i> -hexane: isopropanol | Retention time(min) |                   |
|-------------------|--------|-----------------|---------------|-------------------------------|---------------------|-------------------|
|                   |        |                 |               |                               | T1                  | T2                |
| 3a'               | OD-H   | 210             | 1             | 99.5:0.5                      | 37.5 <sup>S</sup>   | 53.0 <sup>R</sup> |
| 4a <sup>[a]</sup> | IC     | 254             | 0.5           | 97:3                          | 34.1 <sup>R</sup>   | 35.5 <sup>S</sup> |
| 4b <sup>[b]</sup> | AS-H   | 254             | 1             | 90:10                         | 21.4 <sup>R</sup>   | 30.6 <sup>S</sup> |
| 6a                | OJ-H   | 254             | 1             | 85:15                         | 9.7 <sup>R</sup>    | 11.7 <sup>S</sup> |
| 6c                | OJ-H   | 210             | 0.5           | 90:10                         | 16.2 <sup>R</sup>   | 17.7 <sup>S</sup> |
| 6d                | OJ-H   | 210             | 0.5           | 90:10                         | 28.2 <sup>R</sup>   | 37.5 <sup>S</sup> |
| 6e                | OJ-H   | 210             | 0.5           | 90:10                         | 22.6 <sup>R</sup>   | 23.7 <sup>S</sup> |
| 6f                | OJ-H   | 210             | 0.5           | 98:2                          | 44.8 <sup>R</sup>   | 46.8 <sup>S</sup> |
| 6g                | OJ-H   | 210             | 0.5           | 90:10                         | 18.8 <sup>S</sup>   | 20.3 <sup>R</sup> |
| 6h                | OJ-H   | 210             | 1             | 85:15                         | 16.5 <sup>R</sup>   | 22.7 <sup>S</sup> |
| 6i                | OJ-H   | 210             | 0.5           | 90:10                         | 25.7 <sup>A</sup>   | 30.7 <sup>B</sup> |

[a] Derivatized with Fmoc *N*-hydroxysuccinimide.

[b] Derivatized with 4-nitrobenzene sulfonyl chloride.

[c] Assignment of enantiomers (A)- and (B-) determined by order of elution.

## S2.2 Supplementary figures

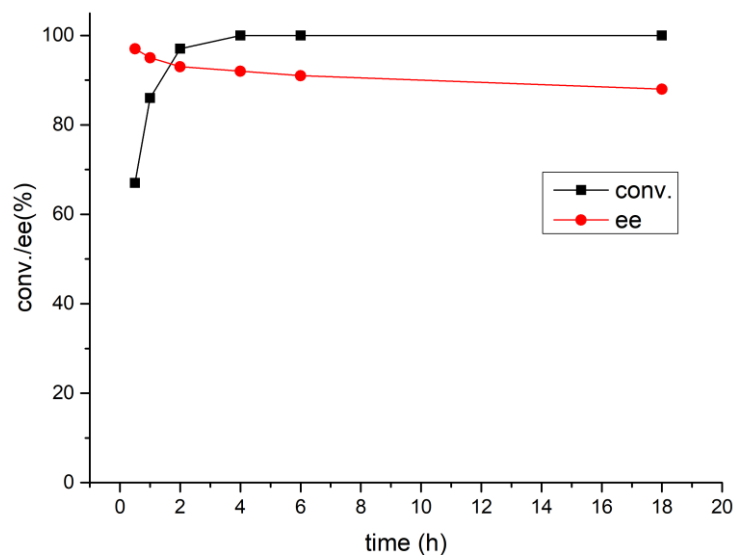

**Figure S1.** Conversion and stereoselectivity at different time in the reduction of **2a** using purified OYE1

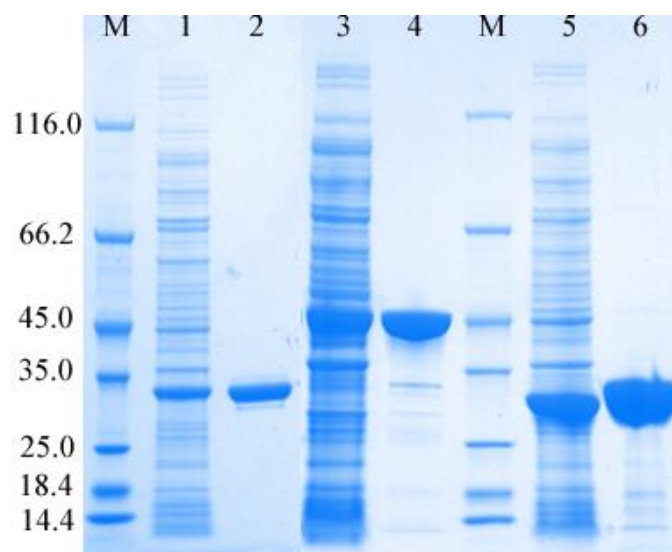

**Figure S2.** SDS-PAGE analysis of the purified IREDs. Lane M: protein maker; Lane 1,3,5: the supernatant of lysate of IR97, OYE1, IR43; Lane 2,4,6: purified enzyme of IR97, OYE1, IR43.

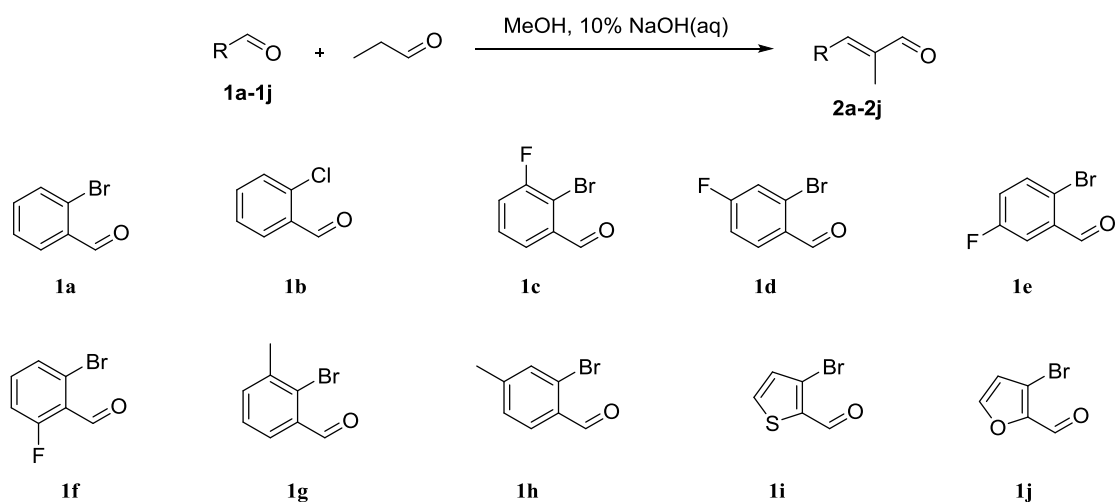

**Figure S3.** Synthetic routes of  $\alpha,\beta$ -unsaturated aldehyde **2a-2j** used in this study.

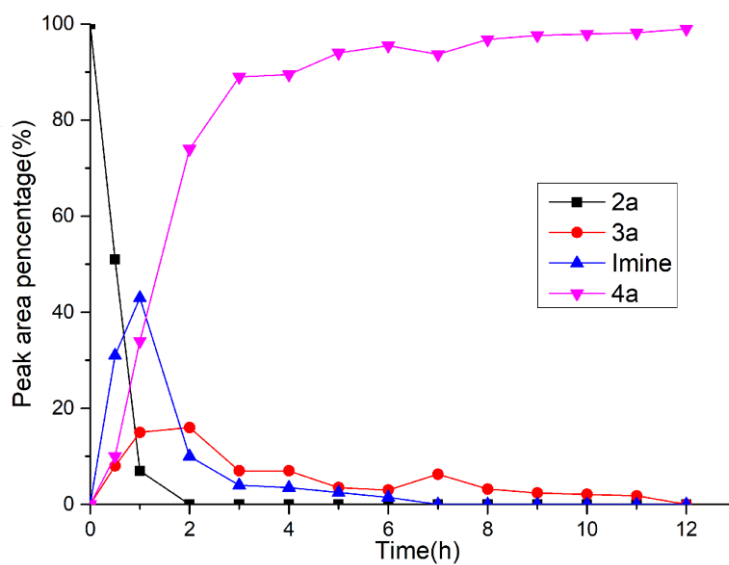

**Figure S4.** Time course of the preparative scale reaction in 500 mL of **2a** (The imine was confirmed by GC-MS).

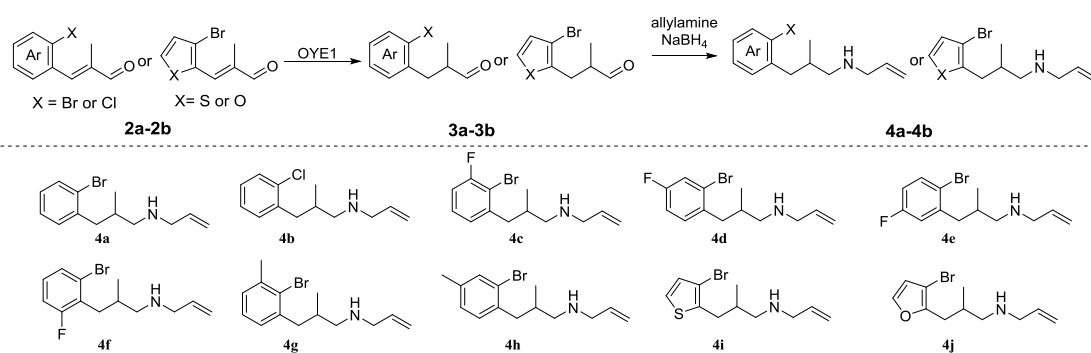

**Figure S5.** Synthetic routes of racemate of **4a-4j**.

### S2.3 Sequence information

#### >OYE1

Protein sequence:

MSFVKDFKQALGDTNLFKPIKIGNNELLHRAVIPPLTRMRALHPGNIIPNRDWAVEYTTQRAQRPGTMIITEGAFISQAGGYDNAPGVW  
SEEQMVEWTKIFNAIHEKKSFFVWVQLWVWLGWAAPDNLARDGLRYDSASDNVFMDAEQEAKAKKANNPQHSLTKDEIKQYIKEYVQAA  
KNSIAAGADGVEIHSANGYLLNQFLDPHSNTRTDEYGGSIENRARFTLEVVDALVEAIGHEKVLRLSPYGVFNSMSGGAETGIVAQYAYVA  
GELEKRAKAGKRLAFVHLVEPRVTNPFLEGEGEYEGGSNDFVYSIWKGPVIRAGNFALHPEVVREEVKDKRTLIGYGRFFISNPDLDVDRLEK  
GLPLNKYDRDTFYQMSAHGYIDYPTYEEALKLGWDKK\*

Gene sequence (with codon optimization):

catATGAGTTTCGTTAAGGATTTCAAGCCGCAGGCACTGGGTGACCAATCTGTTAAACCGATTAAGATTGGTAACAATGAGCTGCTG  
CATCGCGCCGTGATTCGCCGTGACCCGCATCGCGCCCTGCACCCTGGTAATATTCCGAATCGCGATTGGCCGTGGAATATTATACC  
CAGCGTGCACAGCGCCCGGGCACCATGATTATTACCGAAGCGCCTTTATTAGTCCGCAGGCAGGTGGTTATGATAATGCCCGGGCGT  
GTGGAGCGAAGAACAGATGGTGAATGGACCAAAATTTTAATGCCATTCATGAAAAGAAGAGCTTTGTGTGGGTGCAGCTGTGGGT  
GCTGGGTTGGGCCCATTTCCGATAATCTGGCCCGTATGGCCTGCGTTATGATAGCGCAAGTGATAATGTTTTATGGATGCCGAACA  
GGAAGCCAAAGCAAAAAGGCCAATAATCCGCAGCATAGTCTGACCAAGATGAAATTAAGCAGTATATTAAGGAGTACGTTCCAGGCC  
GCAAAAATAGCATTGCAGCCGGTGCAGATGGTGTGAAATTCATAGTCCAATGGTTATCTGCTGAATCAGTTTCTGGATCCGCATAG  
CAATACCCGCACCGATGAATATGGCGGCAGTATTGAAAATCGCGCCCTTTTACCTGGAAGTGGTTGATGCACTGGTGAAGCAATTG  
GCCATGAAAAGTTGGTCTGCGCTGAGTCCGTATGGTGTGTTAATAGCATGAGTGGTGGCGCAGAAACCGGTATTGTGGCCAGTAT  
GCATACGTTGCAGGTGAACTGGAAAACGCGCCAAGCCGGTAAACGCCTGGCCTTTGTTTCATCTGGTGAACCGCGCTTACCAATC  
CGTTTCTGACCGAAGGTGAAGGTGAATATGAAGTGGTAGTAATGATTTTGTTTACAGCATTGGAAGGGCCCGGTTATTCGCGCAGG  
CAATTTTGCCTGCATCCGGAAGTGGTTCGTGAAGAAGTGAAGATAAACGCACCCTGATTGGTTATGGTCGTTCTTTATTAGCAATCC  
GGATCTGGTTGATCGCTGGA AAAAGGCCCTGCCGCTGAATAAGTATGATCGTGATACCTTTTATCAGATGAGTGCACATGGTTATATTGA  
TTATCCGACCTATGAAGAAGCCCTGAAACTGGGTTGGGATAAAAAACACCACCACCACCACCCTGA

#### >IR43

Protein sequence:

MTKTCVVGAGRMGSALARALLAEGIETRVWNRSPEKVAPLVAAGAHTAESLAEVAASDVVIVNVIDYAADALLRMPAVERALAGKVVV  
QLTSGSPRQAREAGRWAERGIAYLDGAIMATPNFIGGAETILYSGMRQAFERHRDVLRFVGGNGVFGEDAGHASALDTGLLTQMWG  
KLFGLTQALAVVRAEIGLEAYRYMRDFQPVVDAATDDLARVGEGRWRGDAATLATIEAHYSAFHLLAVGDEHGLDRVLPALDGLFK  
AALAAGHAADFAALMRFIERGGVRHAA\*

Gene sequence (with codon optimization) :

ATGACCAAAACCTCGTGTGGTGCAGGTCGTATGGGTAGCGCACTGGCACGCGCACTGCTGGCAGAAGGTATTGAAACCCGCGTTT  
GGAATCGCAGTCCGGAAAAAGTGCCACCGCTGGTGGCCCGCGCGCACACCCGCAGAAAGCCTGGCAGAAGCCGTGGCCGCCAG  
CGATGTGGTTATTGTGAATGTGATTGATTATGCCGCGCAGATGCACTGCTGCGTATGCCGGCCGTGGAACCGCGCCCTGGCTGGTAAAG  
TTGTTGTTACAGCTGACCAGCGGTAGTCCGCGCCAGGCACGCGAAGCAGGCCGTTGGGCTGCAGAACCGCGCATTGCCTATCTGGATG  
GCGCAATTATGGCAACCCCGAATTTATTGGTGGCGCCGAAACCACCATTCTGTATAGTGGCATGCGTCAGGCATTGAAACCCATCGTG  
ATGTTCTGCGTGTGTTGGTGGTAATGGCGTGTGTTGTGGGTGAAGATGCCGGCCATGCCAGCGCCCTGGATACCGGTCTGCTGACCA  
GATGTGGGGCAAAGTGTGGTACCCTGCAGGCCCTGGCCGTGGTTCGCGCTGAAGGCATTGGTCTGGAAGCCTATGCCGTTATATG  
CGTGATTTTACGCCGTGGTTGATGCCGCAACCGATGATCTGATTGCACGTGTGGGTGAAGTGCCTGGCGCGGTGACGCCGCAACCT  
TAGCCACCATTGAAGCACATTATAGTGCAATTCATCATCTGCTGGCAGTGGGCGATGAACATGGCCTGGATCGCGTTCTGCCGCGAGCC  
CTGGATGGTCTGTTAAAGCCGCCCTGGCCGAGGTCATGCCGAGATGATTTGAGCACTGATGCGCTTTATTGAACGTGGCGGTGT

## S2.4 Crystallographic information

To assign the absolute configuration of chiral products, the crystal of (*S*)-**4b**-HCl, (*S*)-**4c**-HCl, (*S*)-**4d**-HCl, (*S*)-**4e**-HCl, (*S*)-**4f**-HCl, (*S*)-**4g**-HCl and (*S*)-**4h**-HCl catalyzed by IR43 was obtained in ethanol/ *n*-butyl acetate. Crystal data for it has been deposited in the Cambridge Crystallographic Data Centre (CCDC) with number 2224137, 2241445, 2241442, 2242724, 2241443, 2241444 and 2241441, respectively.

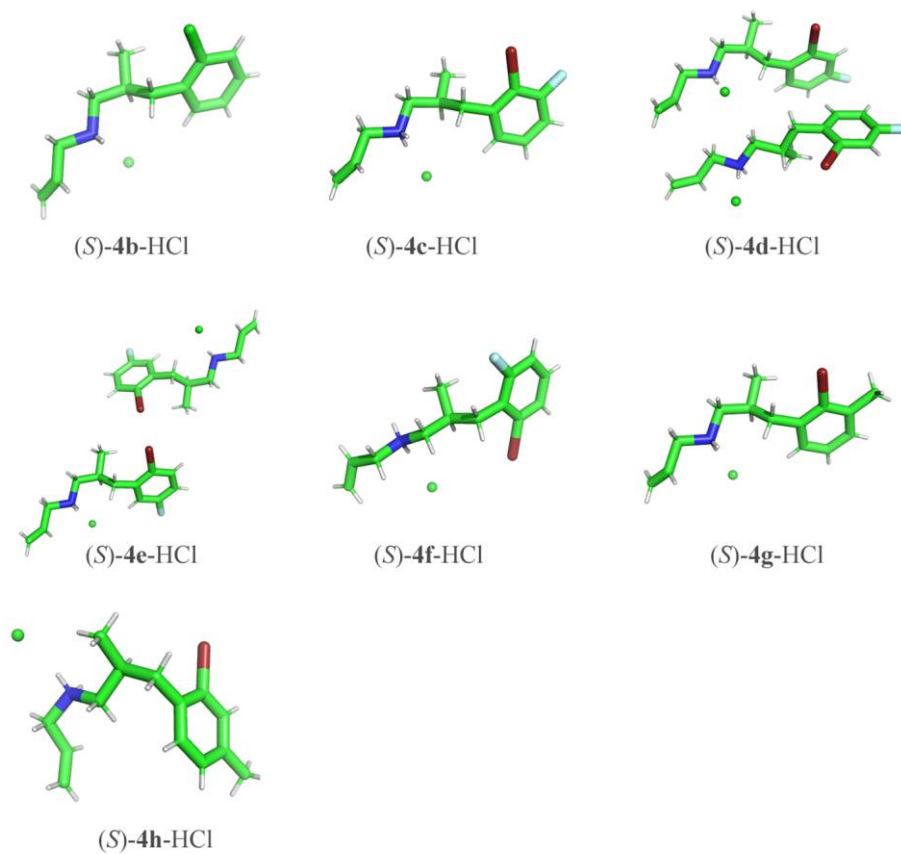

**Figure S6.** X-ray structure of (*S*)-**4b**-HCl (*S*)-**4c**-HCl, (*S*)-**4d**-HCl, (*S*)-**4e**-HCl, (*S*)-**4f**-HCl, (*S*)-**4g**-HCl and (*S*)-**4h**-HCl prepared by IR43.



**Table S6. Crystal data and structure refinement for 2224137 (4b)**

---

|                                             |                                                               |
|---------------------------------------------|---------------------------------------------------------------|
| Identification code                         | 2224137                                                       |
| Empirical formula                           | C <sub>13</sub> H <sub>19</sub> Cl <sub>2</sub> N             |
| Formula weight                              | 260.19                                                        |
| Temperature/K                               | 294.15                                                        |
| Crystal system                              | orthorhombic                                                  |
| Space group                                 | P2 <sub>1</sub> 2 <sub>1</sub> 2 <sub>1</sub>                 |
| a/Å                                         | 4.95940(10)                                                   |
| b/Å                                         | 10.73110(10)                                                  |
| c/Å                                         | 27.2017(3)                                                    |
| α/°                                         | 90                                                            |
| β/°                                         | 90                                                            |
| γ/°                                         | 90                                                            |
| Volume/Å <sup>3</sup>                       | 1447.67(4)                                                    |
| Z                                           | 4                                                             |
| ρ <sub>calc</sub> /cm <sup>3</sup>          | 1.194                                                         |
| μ/mm <sup>-1</sup>                          | 3.822                                                         |
| F(000)                                      | 552                                                           |
| Crystal size/mm <sup>3</sup>                | 0.23 × 0.2 × 0.16                                             |
| Radiation                                   | Cu Kα (λ = 1.54184)                                           |
| 2θ range for data collection/°              | 8.858 to 158.51                                               |
| Index ranges                                | -6 ≤ h ≤ 4, -13 ≤ k ≤ 13, -34 ≤ l ≤ 34                        |
| Reflections collected                       | 18528                                                         |
| Independent reflections                     | 3066 [R <sub>int</sub> = 0.0323, R <sub>sigma</sub> = 0.0178] |
| Data/restraints/parameters                  | 3066/0/147                                                    |
| Goodness-of-fit on F <sup>2</sup>           | 1.032                                                         |
| Final R indexes [I >= 2σ (I)]               | R <sub>1</sub> = 0.0297, wR <sub>2</sub> = 0.0858             |
| Final R indexes [all data]                  | R <sub>1</sub> = 0.0306, wR <sub>2</sub> = 0.0867             |
| Largest diff. peak/hole / e Å <sup>-3</sup> | 0.20/-0.19                                                    |
| Flack parameter                             | 0.005(5)                                                      |

---

**Table S7. Crystal data and structure refinement for 2241445(4c)**

---

|                                             |                                                               |
|---------------------------------------------|---------------------------------------------------------------|
| Identification code                         | 2241445                                                       |
| Empirical formula                           | C <sub>13</sub> H <sub>18</sub> BrClFN                        |
| Formula weight                              | 322.64                                                        |
| Temperature/K                               | 113.15                                                        |
| Crystal system                              | monoclinic                                                    |
| Space group                                 | P2 <sub>1</sub>                                               |
| a/Å                                         | 4.8988(2)                                                     |
| b/Å                                         | 10.7881(3)                                                    |
| c/Å                                         | 13.7759(4)                                                    |
| α/°                                         | 90                                                            |
| β/°                                         | 98.020(3)                                                     |
| γ/°                                         | 90                                                            |
| Volume/Å <sup>3</sup>                       | 720.92(4)                                                     |
| Z                                           | 2                                                             |
| ρ <sub>calc</sub> /cm <sup>3</sup>          | 1.486                                                         |
| μ/mm <sup>-1</sup>                          | 3.027                                                         |
| F(000)                                      | 328.0                                                         |
| Crystal size/mm <sup>3</sup>                | 0.26 × 0.2 × 0.16                                             |
| Radiation                                   | MoKα (λ = 0.71073)                                            |
| 2θ range for data collection/°              | 4.814 to 52.736                                               |
| Index ranges                                | -6 ≤ h ≤ 6, -13 ≤ k ≤ 13, -17 ≤ l ≤ 10                        |
| Reflections collected                       | 5945                                                          |
| Independent reflections                     | 2820 [R <sub>int</sub> = 0.0385, R <sub>sigma</sub> = 0.0484] |
| Data/restraints/parameters                  | 2820/1/155                                                    |
| Goodness-of-fit on F <sup>2</sup>           | 1.122                                                         |
| Final R indexes [I >= 2σ (I)]               | R <sub>1</sub> = 0.0589, wR <sub>2</sub> = 0.1500             |
| Final R indexes [all data]                  | R <sub>1</sub> = 0.0615, wR <sub>2</sub> = 0.1517             |
| Largest diff. peak/hole / e Å <sup>-3</sup> | 2.97/-0.66                                                    |
| Flack parameter                             | 0.091(11)                                                     |

---

**Table S8. Crystal data and structure refinement for 2241442 (4d)**

---

|                                             |                                          |
|---------------------------------------------|------------------------------------------|
| Identification code                         | 2241442                                  |
| Empirical formula                           | C <sub>13</sub> H <sub>18</sub> BrClFN   |
| Formula weight                              | 322.64                                   |
| Temperature/K                               | 113.15                                   |
| Crystal system                              | orthorhombic                             |
| Space group                                 | P212121                                  |
| a/Å                                         | 7.6197(2)                                |
| b/Å                                         | 14.1232(3)                               |
| c/Å                                         | 27.1001(7)                               |
| α/°                                         | 90                                       |
| β/°                                         | 90                                       |
| γ/°                                         | 90                                       |
| Volume/Å <sup>3</sup>                       | 2916.37(12)                              |
| Z                                           | 8                                        |
| ρ <sub>calc</sub> /cm <sup>3</sup>          | 1.470                                    |
| μ/mm <sup>-1</sup>                          | 2.993                                    |
| F(000)                                      | 1312.0                                   |
| Crystal size/mm <sup>3</sup>                | 0.26 × 0.23 × 0.17                       |
| Radiation                                   | Mo Kα (λ = 0.71073)                      |
| 2θ range for data collection/°              | 5.354 to 56.564                          |
| Index ranges                                | -10 ≤ h ≤ 10, -18 ≤ k ≤ 18, -35 ≤ l ≤ 36 |
| Reflections collected                       | 16201                                    |
| Independent reflections                     | 7206 [Rint = 0.0399, Rsigma = 0.0545]    |
| Data/restraints/parameters                  | 7206/0/309                               |
| Goodness-of-fit on F <sup>2</sup>           | 0.997                                    |
| Final R indexes [I >= 2σ (I)]               | R1 = 0.0427, wR2 = 0.0909                |
| Final R indexes [all data]                  | R1 = 0.0529, wR2 = 0.0959                |
| Largest diff. peak/hole / e Å <sup>-3</sup> | 0.76/-0.40                               |
| Flack parameter                             | 0.011(6)                                 |

---

**Table S9. Crystal data and structure refinement for 2242724 (4e)**

---

|                                             |                                        |
|---------------------------------------------|----------------------------------------|
| Identification code                         | R20230217e_twin1_hklf5                 |
| Empirical formula                           | C13H18BrClFN                           |
| Formula weight                              | 322.64                                 |
| Temperature/K                               | 113.15                                 |
| Crystal system                              | monoclinic                             |
| Space group                                 | P21                                    |
| a/Å                                         | 4.83350(10)                            |
| b/Å                                         | 26.0950(6)                             |
| c/Å                                         | 11.3444(3)                             |
| $\alpha$ /°                                 | 90                                     |
| $\beta$ /°                                  | 90.954(2)                              |
| $\gamma$ /°                                 | 90                                     |
| Volume/Å <sup>3</sup>                       | 1430.67(6)                             |
| Z                                           | 4                                      |
| $\rho$ calcg/cm <sup>3</sup>                | 1.498                                  |
| $\mu$ /mm <sup>-1</sup>                     | 3.050                                  |
| F(000)                                      | 656.0                                  |
| Crystal size/mm <sup>3</sup>                | 0.38 × 0.22 × 0.16                     |
| Radiation                                   | MoK $\alpha$ ( $\lambda$ = 0.71073)    |
| 2 $\Theta$ range for data collection/°      | 3.122 to 57.394                        |
| Index ranges                                | -6 ≤ h ≤ 5, -35 ≤ k ≤ 35, -15 ≤ l ≤ 15 |
| Reflections collected                       | 11088                                  |
| Independent reflections                     | 11088 [Rint = ?, Rsigma = 0.0167]      |
| Data/restraints/parameters                  | 11088/1/311                            |
| Goodness-of-fit on F <sup>2</sup>           | 1.018                                  |
| Final R indexes [ $l \geq 2\sigma$ (I)]     | R1 = 0.0491, wR2 = 0.1436              |
| Final R indexes [all data]                  | R1 = 0.0531, wR2 = 0.1472              |
| Largest diff. peak/hole / e Å <sup>-3</sup> | 0.87/-0.80                             |
| Flack parameter                             | 0.004(8)                               |

---

**Table S10. Crystal data and structure refinement for 2241443 (4f)**

---

|                                             |                                        |
|---------------------------------------------|----------------------------------------|
| Identification code                         | 2241443                                |
| Empirical formula                           | C <sub>13</sub> H <sub>18</sub> BrClFN |
| Formula weight                              | 322.64                                 |
| Temperature/K                               | 113.15                                 |
| Crystal system                              | orthorhombic                           |
| Space group                                 | P212121                                |
| a/Å                                         | 4.7559(2)                              |
| b/Å                                         | 10.6799(4)                             |
| c/Å                                         | 28.6366(9)                             |
| α/°                                         | 90                                     |
| β/°                                         | 90                                     |
| γ/°                                         | 90                                     |
| Volume/Å <sup>3</sup>                       | 1454.53(9)                             |
| Z                                           | 4                                      |
| ρ <sub>calc</sub> /cm <sup>3</sup>          | 1.473                                  |
| μ/mm <sup>-1</sup>                          | 3.000                                  |
| F(000)                                      | 656.0                                  |
| Crystal size/mm <sup>3</sup>                | 0.27 × 0.23 × 0.18                     |
| Radiation                                   | MoKα (λ = 0.71073)                     |
| 2θ range for data collection/°              | 4.07 to 56.554                         |
| Index ranges                                | -6 ≤ h ≤ 6, -11 ≤ k ≤ 14, -38 ≤ l ≤ 37 |
| Reflections collected                       | 8772                                   |
| Independent reflections                     | 3566 [Rint = 0.0358, Rsigma = 0.0463]  |
| Data/restraints/parameters                  | 3566/0/155                             |
| Goodness-of-fit on F <sup>2</sup>           | 1.060                                  |
| Final R indexes [I ≥ 2σ (I)]                | R1 = 0.0394, wR2 = 0.0842              |
| Final R indexes [all data]                  | R1 = 0.0467, wR2 = 0.0879              |
| Largest diff. peak/hole / e Å <sup>-3</sup> | 0.69/-0.29                             |
| Flack parameter                             | 0.006(8)                               |

---

**Table S11. Crystal data and structure refinement for 2241444 (4g)**

---

|                                             |                                        |
|---------------------------------------------|----------------------------------------|
| Identification code                         | 2241444                                |
| Empirical formula                           | C <sub>14</sub> H <sub>21</sub> BrClN  |
| Formula weight                              | 318.68                                 |
| Temperature/K                               | 113.15                                 |
| Crystal system                              | orthorhombic                           |
| Space group                                 | P212121                                |
| a/Å                                         | 4.9604(2)                              |
| b/Å                                         | 10.8195(4)                             |
| c/Å                                         | 29.3754(10)                            |
| $\alpha$ /°                                 | 90                                     |
| $\beta$ /°                                  | 90                                     |
| $\gamma$ /°                                 | 90                                     |
| Volume/Å <sup>3</sup>                       | 1576.55(10)                            |
| Z                                           | 4                                      |
| $\rho$ calcg/cm <sup>3</sup>                | 1.343                                  |
| $\mu$ /mm <sup>-1</sup>                     | 2.758                                  |
| F(000)                                      | 656.0                                  |
| Crystal size/mm <sup>3</sup>                | 0.28 × 0.23 × 0.17                     |
| Radiation                                   | MoK $\alpha$ ( $\lambda$ = 0.71073)    |
| 2 $\Theta$ range for data collection/°      | 4.012 to 52.744                        |
| Index ranges                                | -6 ≤ h ≤ 4, -13 ≤ k ≤ 13, -36 ≤ l ≤ 30 |
| Reflections collected                       | 7454                                   |
| Independent reflections                     | 3206 [Rint = 0.0333, Rsigma = 0.0409]  |
| Data/restraints/parameters                  | 3206/0/156                             |
| Goodness-of-fit on F <sup>2</sup>           | 1.088                                  |
| Final R indexes [ $I \geq 2\sigma(I)$ ]     | R1 = 0.0350, wR2 = 0.0842              |
| Final R indexes [all data]                  | R1 = 0.0375, wR2 = 0.0855              |
| Largest diff. peak/hole / e Å <sup>-3</sup> | 0.86/-0.28                             |
| Flack parameter                             | 0.010(8)                               |

---

**Table S12. Crystal data and structure refinement for 2241441 (4h)**

---

|                                             |                                         |
|---------------------------------------------|-----------------------------------------|
| Identification code                         | 2241441                                 |
| Empirical formula                           | C <sub>14</sub> H <sub>21</sub> BrClN   |
| Formula weight                              | 318.68                                  |
| Temperature/K                               | 113.15                                  |
| Crystal system                              | monoclinic                              |
| Space group                                 | P21                                     |
| a/Å                                         | 9.5543(2)                               |
| b/Å                                         | 6.5919(2)                               |
| c/Å                                         | 12.4634(3)                              |
| α/°                                         | 90                                      |
| β/°                                         | 98.424(2)                               |
| γ/°                                         | 90                                      |
| Volume/Å <sup>3</sup>                       | 776.49(3)                               |
| Z                                           | 2                                       |
| ρ <sub>calc</sub> /cm <sup>3</sup>          | 1.363                                   |
| μ/mm <sup>-1</sup>                          | 2.800                                   |
| F(000)                                      | 328.0                                   |
| Crystal size/mm <sup>3</sup>                | 0.24 × 0.2 × 0.15                       |
| Radiation                                   | MoKα (λ = 0.71073)                      |
| 2θ range for data collection/°              | 4.31 to 69.308                          |
| Index ranges                                | -15 ≤ h ≤ 14, -10 ≤ k ≤ 6, -19 ≤ l ≤ 18 |
| Reflections collected                       | 11301                                   |
| Independent reflections                     | 5531 [Rint = 0.0287, Rsigma = 0.0424]   |
| Data/restraints/parameters                  | 5531/1/156                              |
| Goodness-of-fit on F <sup>2</sup>           | 1.029                                   |
| Final R indexes [I >= 2σ (I)]               | R1 = 0.0380, wR2 = 0.0820               |
| Final R indexes [all data]                  | R1 = 0.0495, wR2 = 0.0866               |
| Largest diff. peak/hole / e Å <sup>-3</sup> | 0.48/-0.49                              |
| Flack parameter                             | 0.009(6)                                |

---

## S2.5 NMR data, mass spectrum data and optical rotation of the products

### (S)-3-(2-chlorophenyl)-2-methylpropan-1-ol((S)-**3a'**)

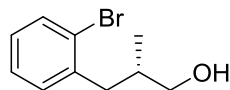

Reduction of 2 mmol **2a** catalyzed by purified OYE1 and subsequent chemical reduction gave 235 mg (S)-**3a'** as a light yellow oil with 51% isolated yield and 93% *ee* values. <sup>1</sup>H NMR (400MHz, CHLOROFORM-*d*)  $\delta$  = 7.53 (d, *J*=8.1 Hz, 1 H), 7.18 - 7.25 (m, 2 H), 7.01 - 7.13 (m, 1 H), 3.54 (dd, *J*=13.4, 5.6 Hz, 2 H), 2.91 (dd, *J*=13.4, 6.4 Hz, 1 H), 2.54 (dd, *J*=13.4, 8.1 Hz, 1 H), 2.06 (dd, *J*=13.3, 6.7 Hz, 1 H), 0.96 ppm (d, *J*=6.6 Hz, 3 H). <sup>13</sup>C NMR (100MHz, CHLOROFORM-*d*)  $\delta$  = 140.16, 132.92, 131.44, 127.72, 127.23, 124.85, 67.51, 39.60, 36.40, 16.47. HRMS calcd. for C<sub>10</sub>H<sub>13</sub>BrNaO<sup>+</sup> 251.0047 and 253.0027 [M+Na]<sup>+</sup>, found 251.0053 and 253.0027. [ $\alpha$ ]<sub>D</sub><sup>20</sup> = -3.850 (c = 1.0, CHCl<sub>3</sub>).

### 3-(2-chlorophenyl)-2-methylpropan-1-ol(Rac-**3a'**)

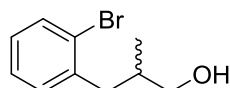

Reduction of 1 mmol **2a** catalyzed by cell-free extracts of N8-2 and subsequent chemical reduction gave 120 mg Rac-**3a'** as a light yellow oil with 52% isolated yield. <sup>1</sup>H NMR (400MHz, CHLOROFORM-*d*)  $\delta$  = 7.49 - 7.60 (m, 1 H), 7.17 - 7.29 (m, 2 H), 7.06 (br. s., 1 H), 3.44 - 3.65 (m, 2 H), 2.91 (dd, *J*=13.4, 6.4 Hz, 1 H), 2.54 (dd, *J*=13.3, 7.9 Hz, 1 H), 2.06 (d, *J*=6.6 Hz, 1 H), 0.96 ppm (d, *J*=6.6 Hz, 3 H). <sup>13</sup>C NMR (100MHz, CHLOROFORM-*d*)  $\delta$  = 140.16, 132.92, 131.44, 127.72, 127.23, 124.85, 67.51, 39.60, 36.40, 16.47. HRMS calcd. for C<sub>10</sub>H<sub>13</sub>BrNaO<sup>+</sup> 251.0047 and 253.0027 [M+Na]<sup>+</sup>, found 251.0064 and 253.0034.

### (S)-N-(3-(2-bromophenyl)-2-methylpropyl) prop-2-en-1-amine ((S)-**4a**)

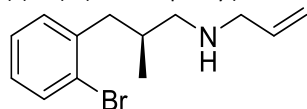

One-pot biocatalytic cascade reduction and reductive amination of 10 mmol **2a** catalyzed by purified OYE1 and IR43 gave 1.945 g (S)-**4a** as a light yellow oil with 74% isolated yield and >99% *ee* values. <sup>1</sup>H NMR (400MHz, CHLOROFORM-*d*)  $\delta$  = 7.58 (d, *J* = 7.8 Hz, 1 H), 7.30 - 7.20 (m, 2 H), 7.14 - 7.06 (m, 1 H), 5.96 (tdd, *J* = 6.0, 10.5, 16.9 Hz, 1 H), 5.22 (dd, *J* = 1.5, 17.1 Hz, 1 H), 5.14 (d, *J* = 10.3 Hz, 1 H), 3.31 (d, *J* = 6.1 Hz, 2 H), 2.94 (dd, *J* = 6.0, 13.3 Hz, 1 H), 2.71 - 2.63 (m, 1 H), 2.60 - 2.50 (m, 2 H), 2.18 - 2.06 (m, 1 H), 0.98 (d, *J* = 6.6 Hz, 3 H). <sup>13</sup>C NMR (100MHz, CHLOROFORM-*d*)  $\delta$  = 140.38, 136.82, 132.87, 131.44, 127.60, 127.11, 124.88, 115.96, 55.34, 52.50, 41.46, 33.80, 17.91. HRMS calcd. for C<sub>13</sub>H<sub>19</sub>BrN<sup>+</sup> 268.0695 and 270.0728 [M+H]<sup>+</sup>, found 268.0714 and 270.0694. [ $\alpha$ ]<sub>D</sub><sup>20</sup> = +15.999 (c = 1.0, MeOH).

### (S)-N-(3-(2-chlorophenyl)-2-methylpropyl)prop-2-en-1-amine ((S)-**4b**)

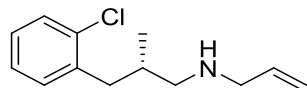

One-pot biocatalytic cascade reduction and reductive amination of 1 mmol **2b** catalyzed by purified OYE1 and IR43 gave 170 mg (S)-**4b** as a light yellow oil with 76% isolated yield and >99% *ee* values. <sup>1</sup>H NMR (400MHz, CHLOROFORM-*d*)  $\delta$  = 7.33 (d, *J* = 7.3 Hz, 1 H), 7.22 - 7.06 (m, 3 H), 6.02 - 5.83 (m, 1 H), 5.23 - 5.00 (m, 2 H), 3.34 - 3.12 (m, 2 H), 2.88 (dd, *J* = 5.9, 13.4 Hz, 1 H), 2.66 - 2.56 (m, 1 H), 2.54 - 2.44 (m, 2 H), 2.11 - 1.98 (m, 1 H), 0.95 - 0.88 (m, 3 H). <sup>13</sup>C NMR (100MHz, CHLOROFORM-*d*)  $\delta$  = 138.72, 136.92, 134.27, 131.42, 129.52, 127.32, 126.47, 115.87, 55.46, 52.55, 38.97, 33.85, 17.97. HRMS calcd. for C<sub>13</sub>H<sub>19</sub>ClN<sup>+</sup> 224.1200 [M+H]<sup>+</sup>, found 224.1184. [ $\alpha$ ]<sub>D</sub><sup>20</sup> = +15.269 (c = 1.0, MeOH).

### (S)-N-(3-(2-bromo-3-fluorophenyl)-2-methylpropyl)prop-2-en-1-amine ((S)-**4c**)

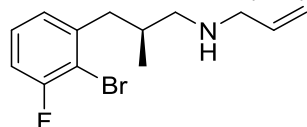

One-pot biocatalytic cascade reduction and reductive amination of 1 mmol **2c** catalyzed by purified OYE1 and IR43 gave 190 mg (S)-**4c** as a light yellow oil with 66% isolated yield and 97% *ee* values. <sup>1</sup>H NMR (400MHz, CHLOROFORM-*d*)  $\delta$  = 7.18 (dt, *J* = 5.7, 7.8 Hz, 1 H), 7.01 - 6.92 (m, 2 H), 5.90 (tdd, *J* = 6.0, 10.6, 16.9 Hz, 1 H), 5.24 - 5.03 (m, 2 H), 3.25 (d, *J* = 6.1 Hz, 2 H), 2.94 (dd, *J* = 6.0, 13.3 Hz, 1 H), 2.68 - 2.44 (m, 3 H), 2.13 - 1.96 (m, 1 H), 0.92 (d, *J* = 6.6 Hz, 3 H). <sup>13</sup>C NMR (100MHz, CHLOROFORM-*d*)  $\delta$  = 159.28 (d, *J* = 245 Hz), 143.05, 136.91, 127.79 (d, *J* = 8 Hz), 126.49 (d, *J* = 4 Hz), 115.91, 113.80 (d, *J* = 17 Hz), 111.71 (d, *J* = 20 Hz), 55.34, 52.57, 41.09, 33.87, 17.88. HRMS calcd. for C<sub>13</sub>H<sub>18</sub>BrFN<sup>+</sup> 286.0601 and 288.0581 [M+H]<sup>+</sup>, found 286.0613 and 288.0595. [ $\alpha$ ]<sub>D</sub><sup>20</sup> = +11.419 (c = 1.0, MeOH).

### (S)-N-(3-(2-bromo-4-fluorophenyl)-2-methylpropyl)prop-2-en-1-amine hydrochloride ((S)-**4d**)

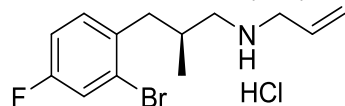



One-pot biocatalytic cascade reduction and reductive amination of 1 mmol **2d** catalyzed by purified OYE1 and IR43 gave 175 mg (**S**)-**4d**-HCl as a white solid with 61% isolated yield and >99% *ee* values. <sup>1</sup>H NMR (400MHz, METHANOL-*d*<sub>4</sub>) δ = 7.41 (dd, *J* = 2.6, 8.4 Hz, 1 H), 7.35 (dd, *J* = 6.1, 8.6 Hz, 1 H), 7.11 (dt, *J* = 2.6, 8.4 Hz, 1 H), 5.95 (tdd, *J* = 7.0, 10.2, 17.1 Hz, 1 H), 5.61 - 5.45 (m, 2 H), 3.68 (d, *J* = 6.8 Hz, 2 H), 3.05 - 2.85 (m, 3 H), 2.67 (dd, *J* = 8.6, 13.7 Hz, 1 H), 2.37 - 2.22 (m, 1 H), 1.04 (d, *J* = 6.8 Hz, 3 H). <sup>13</sup>C NMR (100MHz, METHANOL-*d*<sub>4</sub>) δ = 161.28 (d, *J* = 247 Hz), 134.50 (d, *J* = 3 Hz), 132.39 (d, *J* = 8 Hz), 127.66, 124.14 (d, *J* = 9 Hz), 123.26, 119.58 (d, *J* = 24 Hz), 114.37 (d, *J* = 22 Hz), 52.10, 50.08, 39.25, 31.45, 15.87. HRMS calcd. for C<sub>13</sub>H<sub>18</sub>BrFN<sup>+</sup> 286.0601 and 288.0581 [M+H]<sup>+</sup>, found 286.0612 and 288.0601. [α]<sub>D</sub><sup>20</sup> = +12.039 (c = 1.0, MeOH).

(*S*)-*N*-(3-(2-bromo-5-fluorophenyl)-2-methylpropyl)prop-2-en-1-amine hydrochloride ((*S*)-**4e**)

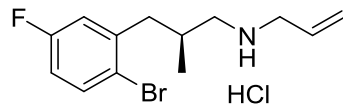

One-pot biocatalytic cascade reduction and reductive amination of 1 mmol **2e** catalyzed by purified OYE1 and IR43 gave 175 mg (*S*)-**4e** as a white solid with 61% isolated yield and 98% *ee* values. <sup>1</sup>H NMR (400MHz, METHANOL-*d*<sub>4</sub>) δ = 7.60 (dd, *J* = 5.4, 8.8 Hz, 1 H), 7.14 (dd, *J* = 2.9, 9.3 Hz, 1 H), 6.96 (dt, *J* = 2.9, 8.4 Hz, 1 H), 5.95 (tdd, *J* = 6.9, 10.2, 17.1 Hz, 1 H), 5.60 - 5.46 (m, 2 H), 3.73 - 3.63 (m, 2 H), 3.06 - 2.84 (m, 3 H), 2.75 - 2.62 (m, 1 H), 2.43 - 2.23 (m, 1 H), 1.05 (d, *J* = 6.8 Hz, 3 H). <sup>13</sup>C NMR (100MHz, METHANOL-*d*<sub>4</sub>) δ = 161.98 (d, *J* = 245 Hz), 140.74 (d, *J* = 7 Hz), 134.16 (d, *J* = 8 Hz), 127.66, 123.27, 118.50 (d, *J* = 3 Hz), 118.02 (d, *J* = 22 Hz), 115.27 (d, *J* = 22 Hz), 52.07, 50.08, 40.05, 31.32, 15.88. HRMS calcd. for C<sub>13</sub>H<sub>18</sub>BrFN<sup>+</sup> 286.0601 and 288.0581 [M+H]<sup>+</sup>, found 286.0619 and 288.0607. [α]<sub>D</sub><sup>20</sup> = +10.129 (c = 1.0, MeOH).

(*S*)-*N*-(3-(2-bromo-6-fluorophenyl)-2-methylpropyl)prop-2-en-1-amine ((*S*)-**4f**)

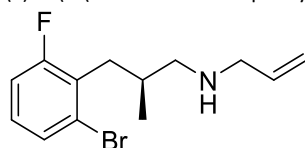

One-pot biocatalytic cascade reduction and reductive amination of 1 mmol **2f** catalyzed by purified OYE1 and IR43 gave 188 mg (*S*)-**4f** as a light yellow oil with 66% isolated yield and 98% *ee* values. <sup>1</sup>H NMR (400MHz, CHLOROFORM-*d*) δ = 7.34 (d, *J* = 7.8 Hz, 1 H), 7.10 - 6.93 (m, 2 H), 5.99 - 5.81 (m, 1 H), 5.23 - 5.02 (m, 2 H), 3.25 (d, *J* = 6.1 Hz, 2 H), 2.91 - 2.81 (m, 1 H), 2.71 - 2.48 (m, 3 H), 2.15 - 1.96 (m, 1 H), 0.94 (d, *J* = 6.6 Hz, 3 H). <sup>13</sup>C NMR (100MHz, CHLOROFORM-*d*) δ = 161.38 (d, *J* = 247 Hz), 136.99, 128.83 (d, *J* = 18 Hz), 128.53 (d, *J* = 3 Hz), 128.12 (d, *J* = 9 Hz), 125.73 (d, *J* = 4 Hz), 115.79, 114.49 (d, *J* = 24 Hz), 55.47, 52.53, 34.17, 33.45, 17.88. HRMS calcd. for C<sub>13</sub>H<sub>18</sub>BrFN<sup>+</sup> 286.0601 and 288.0581 [M+H]<sup>+</sup>, found 286.0617 and 288.0605. [α]<sub>D</sub><sup>20</sup> = +13.719 (c = 1.0, MeOH).

(*S*)-*N*-(3-(2-bromo-3-methylphenyl)-2-methylpropyl)prop-2-en-1-amine ((*S*)-**4g**)

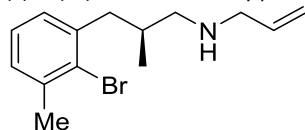

One-pot biocatalytic cascade reduction and reductive amination of 1 mmol **2g** catalyzed by purified OYE1 and IR43 gave 150 mg (*S*)-**4g** as a light yellow oil with 53% isolated yield and 98% *ee* values. <sup>1</sup>H NMR (600MHz, CHLOROFORM-*d*) δ = 7.13 - 7.05 (m, 2 H), 7.01 (dd, *J* = 1.7, 6.8 Hz, 1 H), 5.95 - 5.84 (m, 1 H), 5.16 (dd, *J* = 1.5, 17.2 Hz, 1 H), 5.07 (d, *J* = 10.3 Hz, 1 H), 3.24 (d, *J* = 5.9 Hz, 2 H), 2.91 (dd, *J* = 6.1, 13.4 Hz, 1 H), 2.65 - 2.60 (m, 1 H), 2.56 - 2.48 (m, 2 H), 2.41 (s, 3 H), 2.13 - 2.04 (m, 1 H), 0.92 (d, *J* = 6.6 Hz, 3 H). <sup>13</sup>C NMR (100MHz, CHLOROFORM-*d*) δ = 140.76, 138.62, 137.04, 128.85, 128.51, 127.54, 126.42, 115.73, 55.55, 52.59, 42.28, 33.64, 24.18, 18.00. HRMS calcd. for C<sub>14</sub>H<sub>21</sub>BrN<sup>+</sup> 282.0852 and 284.0832 [M+H]<sup>+</sup>, found 282.0861 and 284.0843. [α]<sub>D</sub><sup>20</sup> = +17.199 (c = 1.0, MeOH).

(*S*)-*N*-(3-(2-bromo-4-methylphenyl)-2-methylpropyl)prop-2-en-1-amine ((*S*)-**4h**)

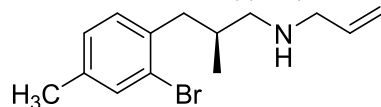

One-pot biocatalytic cascade reduction and reductive amination of 1 mmol **2h** catalyzed by purified OYE1 and IR43 gave 185 mg (*S*)-**4h** as a light yellow oil with 66% isolated yield and >99% *ee* values. <sup>1</sup>H NMR (400MHz, CHLOROFORM-*d*) δ = 7.36 (s, 1 H), 7.10 - 6.97 (m, 2 H), 5.98 - 5.81 (m, 1 H), 5.22 - 5.03 (m, 2 H), 3.24 (d, *J* = 5.9 Hz, 2 H), 2.84 (dd, *J* = 6.1, 13.4 Hz, 1 H), 2.65 - 2.56 (m, 1 H), 2.54 - 2.41 (m, 2 H), 2.29 (s, 3 H), 2.09 - 1.94 (m, 1 H), 0.91 (d, *J* = 6.6 Hz, 3 H). <sup>13</sup>C NMR (100MHz, CHLOROFORM-*d*) δ = 137.52, 137.20, 137.03, 133.25, 131.11, 127.94, 124.60, 115.78, 55.48, 52.60, 41.01, 33.96, 20.59, 17.92. HRMS calcd. for C<sub>14</sub>H<sub>21</sub>BrN<sup>+</sup> 282.0852 and 284.0832 [M+H]<sup>+</sup>, found 282.0875 and 284.0848. [α]<sub>D</sub><sup>20</sup> = +15.309 (c = 1.0, MeOH).

(*B*)-*N*-(3-(3-bromothiophen-2-yl)-2-methylpropyl)prop-2-en-1-amine ((*B*)-**4i**)

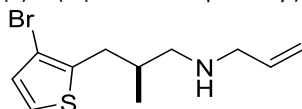

One-pot biocatalytic cascade reduction and reductive amination of 1 mmol **2i** catalyzed by purified OYE1 and IR43 gave 245 mg (*B*)-**4i** as a light yellow oil with 89% isolated yield and 88% *ee* values. <sup>1</sup>H NMR (400MHz, CHLOROFORM-*d*) δ = 7.27 (d, *J* = 2.0 Hz, 1 H), 6.35 (d, *J* = 1.7 Hz, 1 H), 5.90 (tdd, *J* = 6.0, 10.6, 16.9 Hz, 1 H), 5.25 - 5.03 (m, 2 H), 3.24 (d, *J* = 6.1 Hz, 2 H), 2.73 (dd, *J* = 6.1, 14.7 Hz, 1 H), 2.59 - 2.41 (m, 3 H), 2.07 (sxt, *J* = 6.7, 13.6 Hz, 1 H), 0.94 (d, *J* = 6.8 Hz, 3 H). <sup>13</sup>C NMR

(100MHz, CHLOROFORM-d)  $\delta$  = 152.21, 141.37, 137.01, 116.04, 113.67, 97.23, 55.10, 52.66, 33.29, 31.31, 18.22. HRMS calcd. for  $C_{11}H_{17}BrN^+$  274.0230 and 276.0239  $[M+H]^+$ , found 274.0279 and 276.0256.  $[\alpha]_D^{20}$  = +5.200 (c = 1.0, MeOH).

*N*-(3-(3-bromofuran-2-yl)-2-methylpropyl)prop-2-en-1-amine (**4j**) obtained from enzymes

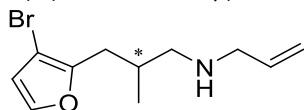

One-pot biocatalytic cascade reduction and reductive amination of 1 mmol **2j** catalyzed by purified OYE1 and IR43 gave 235 mg **4j** as a light yellow oil with 91% isolated yield.  $^1H$  NMR (400MHz, CHLOROFORM-d)  $\delta$  = 7.13 (d,  $J$  = 5.4 Hz, 1 H), 6.94 - 6.86 (m, 1 H), 5.91 (tdd,  $J$  = 6.0, 10.5, 16.9 Hz, 1 H), 5.22 - 5.04 (m, 2 H), 3.25 (d,  $J$  = 6.1 Hz, 2 H), 2.91 (dd,  $J$  = 5.9, 14.7 Hz, 1 H), 2.68 - 2.56 (m, 2 H), 2.54 - 2.46 (m, 1 H), 2.09 - 1.92 (m, 1 H), 0.97 (d,  $J$  = 6.6 Hz, 3 H).  $^{13}C$  NMR (100MHz, CHLOROFORM-d)  $\delta$  = 138.01, 136.91, 129.82, 123.41, 115.92, 109.52, 54.97, 52.57, 35.36, 34.24, 18.02. HRMS calcd. for  $C_{11}H_{17}BrNO^+$  258.0488 and 260.0468  $[M+H]^+$ , found 258.0495 and 260.0508.  $[\alpha]_D^{20}$  = -0.710 (c = 1.0, MeOH).

*N*-(3-(2-bromophenyl)-2-methylpropyl)prop-2-en-1-amine (Rac-**4a**)

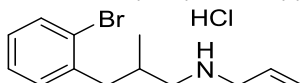

Reduction of 0.5 mmol **2a** catalyzed by purified OYE1 and subsequent chemical reductive amination gave 116 mg Rac-**4a**-HCl as a white solid with 76% isolated yield.  $^1H$  NMR (400MHz, METHANOL- $d_4$ )  $\delta$  = 7.57 (d,  $J$  = 7.8 Hz, 1 H), 7.36 - 7.27 (m, 2 H), 7.15 (ddd,  $J$  = 3.7, 5.1, 8.1 Hz, 1 H), 5.96 (tdd,  $J$  = 6.9, 10.1, 17.1 Hz, 1 H), 5.58 - 5.43 (m, 2 H), 3.67 (d,  $J$  = 6.8 Hz, 2 H), 3.07 - 2.86 (m, 3 H), 2.68 (dd,  $J$  = 8.6, 13.4 Hz, 1 H), 2.42 - 2.24 (m, 1 H), 1.04 (d,  $J$  = 6.6 Hz, 3 H).  $^{13}C$  NMR (100MHz, METHANOL- $d_4$ )  $\delta$  = 138.58, 132.76, 131.50, 128.28, 127.71, 127.46, 124.28, 123.31, 52.13, 50.07, 40.12, 31.41, 16.06. HRMS calcd. for  $C_{13}H_{19}BrN^+$  268.0695 and 270.0728  $[M+H]^+$ , found 268.0716 and 270.0692.

*N*-(3-(2-chlorophenyl)-2-methylpropyl)prop-2-en-1-amine (Rac-**4b**)

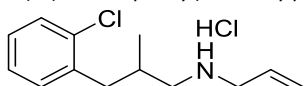

Reduction of 2 mmol **2b** catalyzed by purified OYE1 and subsequent chemical reductive amination gave 239 mg Rac-**4b**-HCl as a white solid with 46% isolated yield.  $^1H$  NMR (400MHz, METHANOL- $d_4$ )  $\delta$  = 7.39 (d,  $J$  = 7.3 Hz, 1 H), 7.35 - 7.20 (m, 3 H), 5.94 (tdd,  $J$  = 6.9, 10.2, 17.1 Hz, 1 H), 5.61 - 5.41 (m, 2 H), 3.72 - 3.56 (m, 2 H), 3.09 - 2.81 (m, 3 H), 2.67 (dd,  $J$  = 8.4, 13.6 Hz, 1 H), 2.38 - 2.23 (m, 1 H), 1.03 (d,  $J$  = 6.6 Hz, 3 H).  $^{13}C$  NMR (100MHz, METHANOL- $d_4$ )  $\delta$  = 136.58, 133.82, 131.45, 129.36, 128.05, 127.66, 126.83, 123.27, 52.22, 50.05, 37.64, 31.37, 16.03. HRMS calcd. for  $C_{13}H_{19}ClN^+$  224.1200  $[M+H]^+$ , found 224.1196.

*N*-(3-(2-bromo-3-fluorophenyl)-2-methylpropyl)prop-2-en-1-amine (Rac-**4c**)

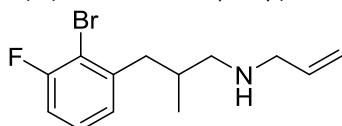

Reduction of 1 mmol **2c** catalyzed by purified OYE1 and subsequent chemical reductive amination gave 205 mg Rac-**4c** as a light yellow oil with 72% isolated yield.  $^1H$  NMR (400MHz, CHLOROFORM-d)  $\delta$  = 7.23 - 7.14 (m, 1 H), 7.04 - 6.91 (m, 2 H), 5.99 - 5.81 (m, 1 H), 5.23 - 5.04 (m, 2 H), 3.25 (d,  $J$  = 5.9 Hz, 2 H), 2.94 (dd,  $J$  = 5.9, 13.4 Hz, 1 H), 2.68 - 2.45 (m, 3 H), 2.12 - 1.98 (m, 1 H), 0.92 (d,  $J$  = 6.8 Hz, 3 H).  $^{13}C$  NMR (100MHz, CHLOROFORM-d)  $\delta$  = 159.26 (d,  $J$  = 245 Hz), 143.06, 136.95, 127.78 (d,  $J$  = 8 Hz), 126.48 (d,  $J$  = 3 Hz), 115.85, 113.82 (d,  $J$  = 23 Hz), 111.71 (d,  $J$  = 19 Hz), 55.35, 52.57, 41.09, 33.88, 17.87. HRMS calcd. for  $C_{13}H_{18}BrFN^+$  286.0601 and 288.0581  $[M+H]^+$ , found 286.0608 and 288.0596.

*N*-(3-(2-bromo-4-fluorophenyl)-2-methylpropyl)prop-2-en-1-amine (Rac-**4d**)

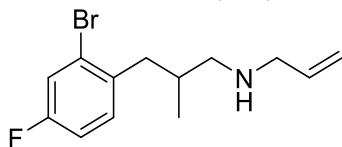

Reduction of 1 mmol **2d** catalyzed by purified OYE1 and subsequent chemical reductive amination gave 133 mg Rac-**4d** as a light yellow oil with 47% isolated yield.  $^1H$  NMR (400MHz, CHLOROFORM-d)  $\delta$  = 7.28 (dd,  $J$  = 2.0, 8.1 Hz, 1 H), 7.19 - 7.11 (m, 1 H), 6.99 - 6.90 (m, 1 H), 5.97 - 5.84 (m, 1 H), 5.23 - 5.13 (m, 1 H), 5.08 (d,  $J$  = 10.0 Hz, 1 H), 3.25 (d,  $J$  = 5.9 Hz, 2 H), 2.86 (dd,  $J$  = 6.0, 13.6 Hz, 1 H), 2.59 (dd,  $J$  = 5.7, 11.6 Hz, 1 H), 2.54 - 2.42 (m, 2 H), 2.06 - 1.93 (m, 1 H), 0.91 (d,  $J$  = 6.6 Hz, 3 H).  $^{13}C$  NMR (100MHz, CHLOROFORM-d)  $\delta$  = 160.78 (d,  $J$  = 247 Hz), 136.88, 136.24 (d,  $J$  = 3 Hz), 131.92 (d,  $J$  = 9 Hz), 124.49 (d,  $J$  = 10 Hz), 119.88 (d,  $J$  = 23 Hz), 115.91, 114.20 (d,  $J$  = 245 Hz), 55.25, 52.57, 40.57, 33.95, 17.81. HRMS calcd. for  $C_{13}H_{18}BrFN^+$  286.0601 and 288.0581  $[M+H]^+$ , found 286.0614 and 288.0596.

*N*-(3-(2-bromo-5-fluorophenyl)-2-methylpropyl)prop-2-en-1-amine (Rac-**4e**)

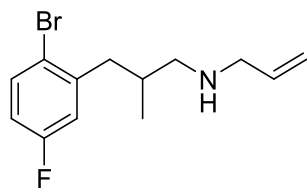

Reduction of 1 mmol **2e** catalyzed by purified OYE1 and subsequent chemical reductive amination gave 150 mg Rac-**4e** as a light yellow oil with 52% isolated yield.  $^1\text{H NMR}$  (400MHz, CHLOROFORM-*d*)  $\delta$  = 7.47 (dd,  $J$  = 5.4, 8.8 Hz, 1 H), 6.93 (dd,  $J$  = 3.1, 9.4 Hz, 1 H), 6.79 (dt,  $J$  = 3.2, 8.3 Hz, 1 H), 5.97 - 5.84 (m, 1 H), 5.21 - 5.13 (m, 1 H), 5.09 (dd,  $J$  = 1.1, 10.1 Hz, 1 H), 3.25 (d,  $J$  = 5.9 Hz, 2 H), 2.88 (dd,  $J$  = 6.1, 13.4 Hz, 1 H), 2.63 - 2.56 (m, 1 H), 2.55 - 2.42 (m, 2 H), 2.11 - 1.95 (m, 1 H), 0.93 (d,  $J$  = 6.6 Hz, 3 H).  $^{13}\text{C NMR}$  (100MHz, CHLOROFORM-*d*)  $\delta$  = 161.74 (d,  $J$  = 245 Hz), 142.64 (d,  $J$  = 7 Hz), 136.92, 133.86 (d,  $J$  = 8 Hz), 118.88 (d,  $J$  = 3 Hz), 118.11 (d,  $J$  = 22 Hz), 115.89, 114.73 (d,  $J$  = 22 Hz), 55.23, 52.57, 41.48, 33.83, 17.84. HRMS calcd. for  $\text{C}_{13}\text{H}_{18}\text{BrFN}^+$  286.0601 and 288.0581  $[\text{M}+\text{H}]^+$ , found 286.0611 and 288.0588.

*N*-(3-(2-bromo-6-fluorophenyl)-2-methylpropyl)prop-2-en-1-amine (Rac-**4f**)

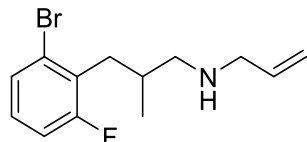

Reduction of 1.25 mmol **2f** catalyzed by purified OYE1 and subsequent chemical reductive amination gave 220 mg Rac-**4f** as a light yellow oil with 62% isolated yield.  $^1\text{H NMR}$  (400MHz, CHLOROFORM-*d*)  $\delta$  = 7.34 (d,  $J$  = 7.8 Hz, 1 H), 7.09 - 6.94 (m, 2 H), 5.98 - 5.84 (m, 1 H), 5.21 - 5.13 (m, 1 H), 5.08 (d,  $J$  = 10.3 Hz, 1 H), 3.26 (d,  $J$  = 5.9 Hz, 2 H), 2.86 (ddd,  $J$  = 2.1, 6.0, 13.2 Hz, 1 H), 2.68 - 2.52 (m, 3 H), 2.13 - 2.02 (m, 1 H), 0.95 (d,  $J$  = 6.6 Hz, 3 H).  $^{13}\text{C NMR}$  (100MHz, CHLOROFORM-*d*)  $\delta$  = 161.39 (d,  $J$  = 247 Hz), 136.78, 128.78 (d,  $J$  = 19 Hz), 128.53 (d,  $J$  = 3 Hz), 128.14 (d,  $J$  = 9 Hz), 125.72 (d,  $J$  = 5 Hz), 115.99, 114.40 (d,  $J$  = 23 Hz), 55.37, 52.47, 34.16, 33.38, 17.82. HRMS calcd. for  $\text{C}_{13}\text{H}_{18}\text{BrFN}^+$  286.0601 and 288.0581  $[\text{M}+\text{H}]^+$ , found 286.0611 and 288.0589.

*N*-(3-(2-bromo-3-methylphenyl)-2-methylpropyl)prop-2-en-1-amine (Rac-**4g**)

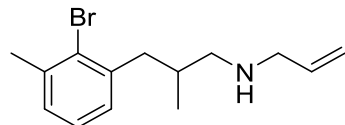

Reduction of 1.25 mmol **2g** catalyzed by purified OYE1 and subsequent chemical reductive amination gave 125 mg Rac-**4g** as a light yellow oil with 35% isolated yield.  $^1\text{H NMR}$  (400MHz, CHLOROFORM-*d*)  $\delta$  = 7.14 - 7.05 (m, 2 H), 7.03 - 6.97 (m, 1 H), 5.99 - 5.82 (m, 1 H), 5.16 (dd,  $J$  = 1.1, 17.2 Hz, 1 H), 5.08 (d,  $J$  = 10.0 Hz, 1 H), 3.25 (d,  $J$  = 5.9 Hz, 2 H), 2.91 (dd,  $J$  = 6.0, 13.3 Hz, 1 H), 2.66 - 2.58 (m, 1 H), 2.56 - 2.47 (m, 2 H), 2.41 (s, 3 H), 2.08 (sxt,  $J$  = 6.7, 13.6 Hz, 1 H), 0.93 (d,  $J$  = 6.6 Hz, 3 H).  $^{13}\text{C NMR}$  (100MHz, CHLOROFORM-*d*)  $\delta$  = 140.75, 138.63, 136.95, 128.86, 128.54, 127.56, 126.45, 115.85, 55.52, 52.57, 42.29, 33.62, 24.20, 18.02. HRMS calcd. for  $\text{C}_{14}\text{H}_{21}\text{BrN}^+$  282.0852 and 284.0832  $[\text{M}+\text{H}]^+$ , found 282.0811 and 284.0845.

*N*-(3-(2-bromo-4-methylphenyl)-2-methylpropyl)prop-2-en-1-amine (Rac-**4h**)

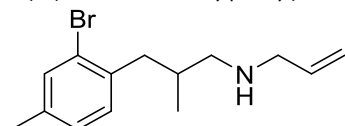

Reduction of 1.5 mmol **2h** catalyzed by purified OYE1 and subsequent chemical reductive amination gave 140 mg Rac-**4h** as a light yellow oil with 33% isolated yield.  $^1\text{H NMR}$  (400MHz, CHLOROFORM-*d*)  $\delta$  = 7.40 (s, 1 H), 7.13 - 7.02 (m, 2 H), 6.04 - 5.87 (m, 1 H), 5.24 - 5.16 (m, 1 H), 5.12 (d,  $J$  = 9.3 Hz, 1 H), 3.29 (d,  $J$  = 6.1 Hz, 2 H), 2.88 (dd,  $J$  = 5.9, 13.4 Hz, 1 H), 2.65 (dd,  $J$  = 5.9, 11.7 Hz, 1 H), 2.58 - 2.45 (m, 2 H), 2.33 (s, 3 H), 2.13 - 1.99 (m, 1 H), 0.96 (d,  $J$  = 6.8 Hz, 3 H).  $^{13}\text{C NMR}$  (100MHz, CHLOROFORM-*d*)  $\delta$  = 137.52, 137.16, 136.87, 133.26, 131.11, 127.60, 124.60, 115.94, 55.40, 52.55, 40.99, 33.91, 20.59, 17.92. HRMS calcd. for  $\text{C}_{14}\text{H}_{21}\text{BrN}^+$  282.0852 and 284.0832  $[\text{M}+\text{H}]^+$ , found 282.0866 and 284.0847.

*N*-(3-(3-bromothiophen-2-yl)-2-methylpropyl)prop-2-en-1-amine (Rac-**4i**)

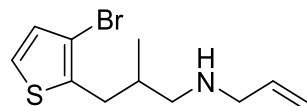

Reduction of 1.5 mmol **2i** catalyzed by purified OYE1 and subsequent chemical reductive amination gave 220 mg Rac-**4i** as a light yellow oil with 54% isolated yield.  $^1\text{H NMR}$  (400MHz, CHLOROFORM-*d*)  $\delta$  = 7.13 (d,  $J$  = 5.4 Hz, 1 H), 6.90 (d,  $J$  = 5.4 Hz, 1 H), 5.91 (tdd,  $J$  = 5.9, 10.7, 16.9 Hz, 1 H), 5.17 (d,  $J$  = 17.1 Hz, 1 H), 5.08 (d,  $J$  = 10.0 Hz, 1 H), 3.25 (d,  $J$  = 5.9 Hz, 2 H), 2.91 (dd,  $J$  = 6.0, 14.5 Hz, 1 H), 2.68 - 2.55 (m, 2 H), 2.54 - 2.45 (m, 1 H), 2.07 - 1.95 (m, 1 H), 0.97 (d,  $J$  = 6.6 Hz, 3 H).  $^{13}\text{C NMR}$  (100MHz, CHLOROFORM-*d*)  $\delta$  = 137.99, 136.86, 129.81, 123.41, 115.95, 109.52, 54.94, 52.55, 35.34, 34.24, 18.01. HRMS calcd. for  $\text{C}_{11}\text{H}_{17}\text{BrNS}^+$  274.0230 and 276.0239  $[\text{M}+\text{H}]^+$ , found 274.0272 and 276.0259.

*N*-(3-(3-bromofuran-2-yl)-2-methylpropyl)prop-2-en-1-amine (Rac-**4j**)

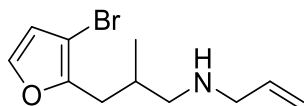

Reduction of 1.5 mmol **2j** catalyzed by purified OYE1 and subsequent chemical reductive amination gave 167 mg Rac-**4j** as a light yellow oil with 43% isolated yield.  $^1\text{H NMR}$  (400MHz, CHLOROFORM- $d$ )  $\delta$  = 7.27 (d,  $J$  = 1.7 Hz, 1 H), 6.35 (d,  $J$  = 1.2 Hz, 1 H), 5.97 - 5.82 (m, 1 H), 5.17 (d,  $J$  = 17.1 Hz, 1 H), 5.08 (d,  $J$  = 10.3 Hz, 1 H), 3.24 (d,  $J$  = 5.6 Hz, 2 H), 2.73 (dd,  $J$  = 6.1, 14.7 Hz, 1 H), 2.59 - 2.42 (m, 3 H), 2.07 (sxt,  $J$  = 6.7, 13.5 Hz, 1 H), 0.94 (d,  $J$  = 6.6 Hz, 3 H).  $^{13}\text{C NMR}$  (100MHz, CHLOROFORM- $d$ )  $\delta$  = 152.08, 141.24, 136.91, 115.87, 113.54, 97.09, 54.98, 52.54, 33.17, 31.19, 18.08. HRMS calcd. for  $\text{C}_{11}\text{H}_{17}\text{BrNO}^+$  258.0488 and 260.0468  $[\text{M}+\text{H}]^+$ , found 258.0495 and 260.0513.

(*S*)-3-methyl-1,2,3,4-tetrahydroquinoline hydrochloride ((*S*)-**6a**)

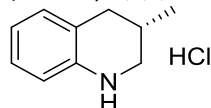

Buchwald-Hartwig amination and deallylation of 0.60 mmol (*S*)-**4a** gave 63 mg (*S*)-**6a**-HCl as a white solid with 57% isolated yield. Buchwald-Hartwig amination and deallylation from 1.0 mmol (*S*)-**4b** gave 105 mg (*S*)-**6a**-HCl as a white solid with 56% isolated yield and >99% *ee* values.  $^1\text{H NMR}$  (400MHz, METHANOL- $d_4$ )  $\delta$  = 7.45 - 7.27 (m, 4 H), 3.61 - 3.52 (m, 1 H), 3.14 - 2.97 (m, 2 H), 2.61 (dd,  $J$  = 10.6, 17.0 Hz, 1 H), 2.39 - 2.20 (m, 1 H), 1.19 (d,  $J$  = 6.8 Hz, 3 H).  $^{13}\text{C NMR}$  (100MHz, METHANOL- $d_4$ )  $\delta$  = 131.28, 130.71, 129.42, 129.09, 127.44, 122.52, 47.76, 32.98, 25.91, 17.05. HRMS calcd. for  $\text{C}_{10}\text{H}_{14}\text{N}^+$  148.1121  $[\text{M}+\text{H}]^+$ , found 148.1122.  $[\alpha]_{\text{D}}^{20}$  = +60.836 ( $c$  = 0.5, MeOH).

(*S*)-8-fluoro-3-methyl-1,2,3,4-tetrahydroquinoline hydrochloride ((*S*)-**6c**)

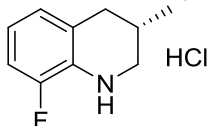

Buchwald-Hartwig amination and deallylation of 1.18 mmol (*S*)-**4c** gave 120 mg (*S*)-**6c**-HCl as a white solid with 51% isolated yield and 98% *ee* values.  $^1\text{H NMR}$  (400MHz, METHANOL- $d_4$ )  $\delta$  = 7.42 - 7.28 (m, 1 H), 7.21 - 7.06 (m, 2 H), 3.55 (d,  $J$  = 11.5 Hz, 1 H), 3.09 - 2.92 (m, 2 H), 2.55 (dd,  $J$  = 10.8, 17.1 Hz, 1 H), 2.19 (d,  $J$  = 2.7 Hz, 1 H), 1.12 (d,  $J$  = 6.6 Hz, 3 H).  $^{13}\text{C NMR}$  (100MHz, METHANOL- $d_4$ )  $\delta$  = 155.60 (d,  $J$  = 247 Hz), 134.06, 129.85 (d,  $J$  = 8 Hz), 125.97 (d,  $J$  = 3 Hz), 117.95 (d,  $J$  = 14 Hz), 113.53 (d,  $J$  = 18 Hz), 47.52, 32.68, 25.59, 16.86. HRMS calcd. for  $\text{C}_{10}\text{H}_{13}\text{FN}^+$  166.1025  $[\text{M}+\text{H}]^+$ , found 166.1025.  $[\alpha]_{\text{D}}^{20}$  = +51.337 ( $c$  = 1.0, MeOH).

(*S*)-7-fluoro-3-methyl-1,2,3,4-tetrahydroquinoline hydrochloride ((*S*)-**6d**)

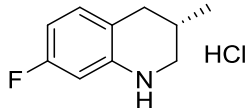

Buchwald-Hartwig amination and deallylation of 0.54 mmol (*S*)-**4d** gave 46 mg (*S*)-**6d**-HCl as a white solid with 42% isolated yield and >99% *ee* values.  $^1\text{H NMR}$  (400MHz, METHANOL- $d_4$ )  $\delta$  = 7.43 (dd,  $J$  = 6.1, 8.6 Hz, 1 H), 7.24 (dt,  $J$  = 2.6, 8.5 Hz, 1 H), 7.17 (dd,  $J$  = 2.4, 8.6 Hz, 1 H), 3.65 - 3.57 (m, 1 H), 3.13 (t,  $J$  = 11.6 Hz, 1 H), 3.05 (dd,  $J$  = 4.9, 16.9 Hz, 1 H), 2.60 (dd,  $J$  = 10.6, 16.7 Hz, 1 H), 2.38 - 2.23 (m, 1 H), 1.22 (d,  $J$  = 6.6 Hz, 3 H).  $^{13}\text{C NMR}$  (100MHz, METHANOL- $d_4$ )  $\delta$  = 161.04 (d,  $J$  = 245 Hz), 132.32 (m), 130.43 (m), 127.26 (d,  $J$  = 4 Hz), 116.16 (d,  $J$  = 21 Hz), 109.66 (d,  $J$  = 25 Hz), 47.85, 32.43, 25.85, 16.96. HRMS calcd. for  $\text{C}_{10}\text{H}_{13}\text{FN}^+$  166.1025  $[\text{M}+\text{H}]^+$ , found 166.1024.  $[\alpha]_{\text{D}}^{20}$  = +86.955 ( $c$  = 1.0, MeOH).

(*S*)-6-fluoro-3-methyl-1,2,3,4-tetrahydroquinoline hydrochloride ((*S*)-**6e**)

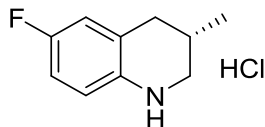

Buchwald-Hartwig amination and deallylation of 0.45 mmol (*S*)-**4e** gave 63 mg (*S*)-**6e**-HCl as a white solid with 36% isolated yield and 98% *ee* values.  $^1\text{H NMR}$  (400MHz, METHANOL- $d_4$ )  $\delta$  = 7.42 - 7.30 (m, 1 H), 7.14 (br. s., 2 H), 3.58 (d,  $J$  = 12.0 Hz, 1 H), 3.15 - 2.98 (m, 2 H), 2.70 - 2.54 (m, 1 H), 2.28 (br. s., 1 H), 1.25 - 1.12 (m, 3 H).  $^{13}\text{C NMR}$  (100MHz, METHANOL- $d_4$ )  $\delta$  = 162.30 (d,  $J$  = 247 Hz), 134.23 (d,  $J$  = 8 Hz), 125.49, 124.72 (d,  $J$  = 9 Hz), 116.82 (d,  $J$  = 23 Hz), 114.59 (d,  $J$  = 24 Hz), 47.80, 33.08, 25.57, 16.86. HRMS calcd. for  $\text{C}_{10}\text{H}_{13}\text{FN}^+$  166.1025  $[\text{M}+\text{H}]^+$ , found 166.1025.  $[\alpha]_{\text{D}}^{20}$  = +51.476 ( $c$  = 0.25, MeOH).

(*S*)-5-fluoro-3-methyl-1,2,3,4-tetrahydroquinoline hydrochloride ((*S*)-**6f**)

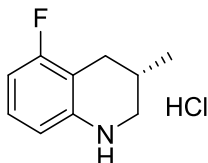

Buchwald-Hartwig amination and deallylation of 0.26 mmol (*S*)-**4f** gave 22 mg (*S*)-**6f**-HCl as a white solid with 42% isolated yield and 97% *ee* values.  $^1\text{H NMR}$  (400MHz, METHANOL- $d_4$ )  $\delta$  = 7.36 - 7.23 (m, 1 H), 7.16 - 7.02 (m, 2 H), 3.47 (d,  $J$  = 11.5 Hz, 1 H), 3.04 - 2.88 (m, 2 H), 2.38 - 2.26 (m, 1 H), 2.20 (d,  $J$  = 3.9 Hz, 1 H), 1.09 (d,  $J$  = 6.6 Hz, 3 H).  $^{13}\text{C NMR}$  (100MHz, METHANOL- $d_4$ )  $\delta$  = 160.84 (d,  $J$  = 245 Hz), 131.12 (d,  $J$  = 7 Hz), 128.28 (d,  $J$  = 9 Hz), 119.79 (d,  $J$  = 22 Hz), 118.50 (d,  $J$  = 4

Hz), 115.22 (d,  $J = 21$  Hz), 47.89, 26.36 (d,  $J = 3$  Hz), 25.05, 17.09. HRMS calcd. for  $C_{10}H_{13}FN^+$  166.1025  $[M+H]^+$ , found 166.1024.  $[\alpha]_D^{20} = +74.156$  ( $c = 0.5$ , MeOH).

(S)-3,8-dimethyl-1,2,3,4-tetrahydroquinoline hydrochloride ((S)-**6g**)

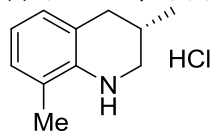

Buchwald-Hartwig amination and deallylation of 0.42 mmol (S)-**4g** gave 17 mg (S)-**6g**-HCl as a white solid with 20% isolated yield and 98% *ee* values.  $^1H$  NMR (400MHz, METHANOL- $d_4$ )  $\delta = 7.32 - 7.26$  (m, 1 H), 7.24 - 7.13 (m, 2 H), 3.60 (d,  $J = 12.0$  Hz, 1 H), 3.09 (t,  $J = 11.9$  Hz, 1 H), 2.99 (dd,  $J = 3.7, 16.9$  Hz, 1 H), 2.60 (dd,  $J = 10.9, 16.7$  Hz, 1 H), 2.42 (s, 3 H), 2.22 (td,  $J = 3.7, 6.8$  Hz, 1 H), 1.19 (d,  $J = 6.6$  Hz, 3 H).  $^{13}C$  NMR (100MHz, METHANOL- $d_4$ )  $\delta = 131.74, 131.40, 129.25, 128.70, 128.39, 128.02, 48.41, 33.60, 25.61, 16.96, 14.76$ . HRMS calcd. for  $C_{11}H_{16}N^+$  162.1277  $[M+H]^+$ , found 162.1272.  $[\alpha]_D^{20} = +64.856$  ( $c = 0.5$ , MeOH).

(S)-3,7-dimethyl-1,2,3,4-tetrahydroquinoline hydrochloride ((S)-**6h**)

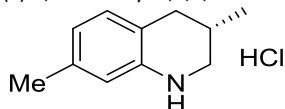

Buchwald-Hartwig amination and deallylation of 0.32 mmol (S)-**4h** gave 30 mg (S)-**6h**-HCl as a white solid with 47% isolated yield and >99% *ee* values.  $^1H$  NMR (400MHz, METHANOL- $d_4$ )  $\delta = 7.27 - 7.19$  (m, 2 H), 7.12 (s, 1 H), 3.60 - 3.48 (m, 1 H), 3.05 (t,  $J = 11.7$  Hz, 1 H), 2.98 (dd,  $J = 4.6, 16.9$  Hz, 1 H), 2.54 (dd,  $J = 10.8, 16.9$  Hz, 1 H), 2.36 (s, 3 H), 2.31 - 2.19 (m, 1 H), 1.17 (d,  $J = 6.6$  Hz, 3 H).  $^{13}C$  NMR (100MHz, METHANOL- $d_4$ )  $\delta = 137.90, 130.47, 129.93, 129.14, 128.05, 122.64, 47.77, 32.64, 26.00, 19.48, 17.07$ . HRMS calcd. for  $C_{11}H_{16}N^+$  162.1277  $[M+H]^+$ , found 162.1276.  $[\alpha]_D^{20} = +64.856$  ( $c = 1.0$ , MeOH).

(B)-6-methyl-4,5,6,7-tetrahydrothieno[3,2-b]pyridine hydrochloride ((B)-**6i**)

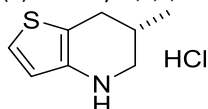

Buchwald-Hartwig amination and deallylation of 1.68 mmol (B)-**4i** gave 160 mg (B)-**6i**-HCl as a white solid with 50% isolated yield and 88% *ee* values.  $^1H$  NMR (400MHz, METHANOL- $d_4$ )  $\delta = 7.50 - 7.40$  (m, 1 H), 7.05 - 6.97 (m, 1 H), 3.62 - 3.51 (m, 1 H), 3.19 - 2.97 (m, 2 H), 2.63 - 2.49 (m, 1 H), 2.37 (br. s., 1 H), 1.21 (d,  $J = 6.8$  Hz, 3 H).  $^{13}C$  NMR (100MHz, METHANOL- $d_4$ )  $\delta = 133.00, 125.70, 124.92, 120.50, 48.17, 29.08, 26.81, 16.65$ . HRMS calcd. for  $C_8H_{13}NS^+$  154.0685  $[M+H]^+$ , found 154.0703.  $[\alpha]_D^{20} = +53.537$  ( $c = 1.0$ , MeOH).

8-fluoro-3-methyl-1,2,3,4-tetrahydroquinoline hydrochloride (Rac-**6c**)

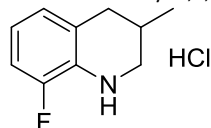

Buchwald-Hartwig amination and deallylation of 0.36 mmol Rac-**4c** gave 30 mg Rac-**6c**-HCl as a white solid with 41% isolated yield.  $^1H$  NMR (400MHz, METHANOL- $d_4$ )  $\delta = 7.48 - 7.35$  (m, 1 H), 7.27 - 7.13 (m, 2 H), 3.62 (d,  $J = 12.2$  Hz, 1 H), 3.15 - 3.00 (m, 2 H), 2.62 (dd,  $J = 10.6, 17.0$  Hz, 1 H), 2.35 - 2.15 (m, 1 H), 1.19 (d,  $J = 6.6$  Hz, 3 H).  $^{13}C$  NMR (100MHz, METHANOL- $d_4$ )  $\delta = 155.58$  (d,  $J = 247$  Hz), 134.01, 129.75 (d,  $J = 8$  Hz), 125.96 (d,  $J = 3$  Hz), 118.04 (d,  $J = 13$  Hz), 113.52 (d,  $J = 18$  Hz), 47.51, 32.67, 25.58, 16.89. HRMS calcd. for  $C_{10}H_{13}FN^+$  166.1025  $[M+H]^+$ , found 166.1034.

7-fluoro-3-methyl-1,2,3,4-tetrahydroquinoline hydrochloride (Rac-**6d**)

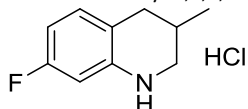

Buchwald-Hartwig amination and deallylation of 0.48 mmol Rac-**4d** gave 43 mg Rac-**6d**-HCl as a white solid with 44% isolated yield.  $^1H$  NMR (400MHz, METHANOL- $d_4$ )  $\delta = 7.38$  (dd,  $J = 6.1, 8.3$  Hz, 1 H), 7.18 (dt,  $J = 2.4, 8.4$  Hz, 1 H), 7.12 (dd,  $J = 2.4, 8.8$  Hz, 1 H), 3.57 (dd,  $J = 1.5, 12.0$  Hz, 1 H), 3.08 (t,  $J = 11.6$  Hz, 1 H), 3.01 (dd,  $J = 4.6, 16.9$  Hz, 1 H), 2.56 (dd,  $J = 10.9, 16.7$  Hz, 1 H), 2.35 - 2.19 (m, 1 H), 1.18 (d,  $J = 6.8$  Hz, 3 H).  $^{13}C$  NMR (100MHz, METHANOL- $d_4$ )  $\delta = 161.06$  (d,  $J = 245$  Hz), 132.32 (d,  $J = 8$  Hz), 130.72 (d,  $J = 9$  Hz), 127.08 (d,  $J = 3$  Hz), 115.91 (d,  $J = 22$  Hz), 109.50 (d,  $J = 25$  Hz), 48.07, 32.48, 25.85, 17.00. HRMS calcd. for  $C_{10}H_{13}FN^+$  166.1025  $[M+H]^+$ , found 166.1023.

6-fluoro-3-methyl-1,2,3,4-tetrahydroquinoline hydrochloride (Rac-**6e**)

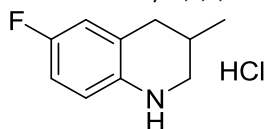

Buchwald-Hartwig amination and deallylation of 0.64 mmol Rac-**4e** gave 30 mg Rac-**6e**-HCl as a white solid with 23% isolated yield.  $^1H$  NMR (400MHz, METHANOL- $d_4$ )  $\delta = 7.35$  (dd,  $J = 4.9, 9.5$  Hz, 1 H), 7.16 - 7.05 (m, 2 H), 3.56 (dd,  $J = 1.3, 12.1$  Hz, 1 H), 3.12 - 2.96 (m, 2 H), 2.59 (dd,  $J = 10.8, 17.1$  Hz, 1 H), 2.35 - 2.17 (m, 1 H), 1.15 (d,  $J = 6.8$  Hz, 3 H).  $^{13}C$  NMR

(100MHz, METHANOL- $d_4$ )  $\delta$  = 162.30 (d,  $J$  = 247 Hz), 134.23 (d,  $J$  = 8 Hz), 125.49, 124.72 (d,  $J$  = 9 Hz), 116.82 (d,  $J$  = 23 Hz), 114.59 (d,  $J$  = 24 Hz), 47.80, 33.08, 25.57, 16.86. HRMS calcd. for  $C_{10}H_{13}FN^+$  166.1025  $[M+H]^+$ , found 166.1039.

5-fluoro-3-methyl-1,2,3,4-tetrahydroquinoline hydrochloride (Rac-6f)

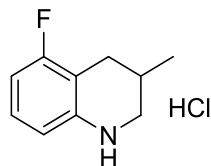

Buchwald-Hartwig amination and deallylation of 0.46 mmol Rac-4f gave 30 mg Rac-6f-HCl as a white solid with 32% isolated yield.  $^1H$  NMR (400MHz, METHANOL- $d_4$ )  $\delta$  = 7.39 - 7.29 (m, 1 H), 7.19 - 7.08 (m, 2 H), 3.51 (d,  $J$  = 11.0 Hz, 1 H), 3.08 - 2.95 (m, 2 H), 2.37 (dd,  $J$  = 10.6, 17.2 Hz, 1 H), 2.29 - 2.14 (m, 1 H), 1.15 (d,  $J$  = 6.6 Hz, 3 H).  $^{13}C$  NMR (100MHz, METHANOL- $d_4$ )  $\delta$  = 160.86 (d,  $J$  = 245 Hz), 131.26 (d,  $J$  = 7 Hz), 128.38 (d,  $J$  = 10 Hz), 119.65 (d,  $J$  = 22 Hz), 118.32 (d,  $J$  = 3 Hz), 115.12 (d,  $J$  = 21 Hz), 47.85, 26.36 (d,  $J$  = 3 Hz), 25.08, 17.05. HRMS calcd. for  $C_{10}H_{13}FN^+$  166.1025  $[M+H]^+$ , found 166.1032.

3,8-dimethyl-1,2,3,4-tetrahydroquinoline hydrochloride (Rac-6g)

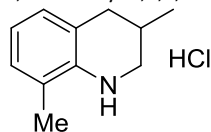

Buchwald-Hartwig amination and deallylation of 0.70 mmol Rac-4g gave 19 mg Rac-6g-HCl as a white solid with 14% isolated yield.  $^1H$  NMR (400MHz, METHANOL- $d_4$ )  $\delta$  = 7.32 - 7.25 (m, 1 H), 7.23 - 7.18 (m, 1 H), 7.16 (d,  $J$  = 7.6 Hz, 1 H), 3.64 - 3.55 (m, 1 H), 3.08 (t,  $J$  = 11.9 Hz, 1 H), 2.98 (dd,  $J$  = 2.9, 16.9 Hz, 1 H), 2.59 (dd,  $J$  = 10.9, 16.7 Hz, 1 H), 2.43 (s, 3 H), 2.32 - 2.13 (m, 1 H), 1.18 (d,  $J$  = 6.8 Hz, 3 H).  $^{13}C$  NMR (100MHz, METHANOL- $d_4$ )  $\delta$  = 131.85, 131.46, 129.25, 128.71, 128.37, 127.97, 48.29, 33.60, 25.57, 16.99, 15.87. HRMS calcd. for  $C_{11}H_{16}N^+$  162.1277  $[M+H]^+$ , found 162.1280.

3,7-dimethyl-1,2,3,4-tetrahydroquinoline hydrochloride (Rac-6h)

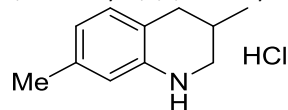

Buchwald-Hartwig amination and deallylation of 0.49 mmol Rac-4h gave 14 mg Rac-6c-HCl as a white solid with 18% isolated yield.  $^1H$  NMR (400MHz, METHANOL- $d_4$ )  $\delta$  = 7.27 - 7.19 (m, 2 H), 7.11 (s, 1 H), 3.55 (d,  $J$  = 12.0 Hz, 1 H), 3.05 (t,  $J$  = 11.6 Hz, 1 H), 2.98 (dd,  $J$  = 4.6, 16.9 Hz, 1 H), 2.54 (dd,  $J$  = 10.8, 16.9 Hz, 1 H), 2.36 (s, 3 H), 2.31 - 2.18 (m, 1 H), 1.17 (d,  $J$  = 6.8 Hz, 3 H).  $^{13}C$  NMR (100MHz, METHANOL- $d_4$ )  $\delta$  = 137.90, 130.47, 129.92, 129.51, 128.04, 122.63, 47.77, 32.64, 26.00, 19.48, 17.07. HRMS calcd. for  $C_{11}H_{16}N^+$  162.1277  $[M+H]^+$ , found 162.1290.

6-methyl-4,5,6,7-tetrahydrothieno[3,2-b]pyridine hydrochloride (Rac-6i)

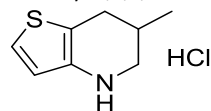

Buchwald-Hartwig amination and deallylation of 0.80 mmol Rac-4i gave 45 mg Rac-6i-HCl as a white solid with 37% isolated yield.  $^1H$  NMR (400MHz, METHANOL- $d_4$ )  $\delta$  = 7.46 (d,  $J$  = 5.4 Hz, 1 H), 7.02 (d,  $J$  = 5.4 Hz, 1 H), 3.57 (dd,  $J$  = 2.2, 12.2 Hz, 1 H), 3.17 - 3.01 (m, 2 H), 2.56 (dd,  $J$  = 10.0, 16.6 Hz, 1 H), 2.44 - 2.28 (m, 1 H), 1.20 (d,  $J$  = 6.6 Hz, 3 H).  $^{13}C$  NMR (100MHz, METHANOL- $d_4$ )  $\delta$  = 132.99, 125.71, 124.91, 120.50, 48.15, 29.07, 26.81, 16.64. HRMS calcd. for  $C_8H_{13}NS^+$  154.0685  $[M+H]^+$ , found 154.0609.

## S2.6 NMR spectra of products

309-Br-OH.001.esp

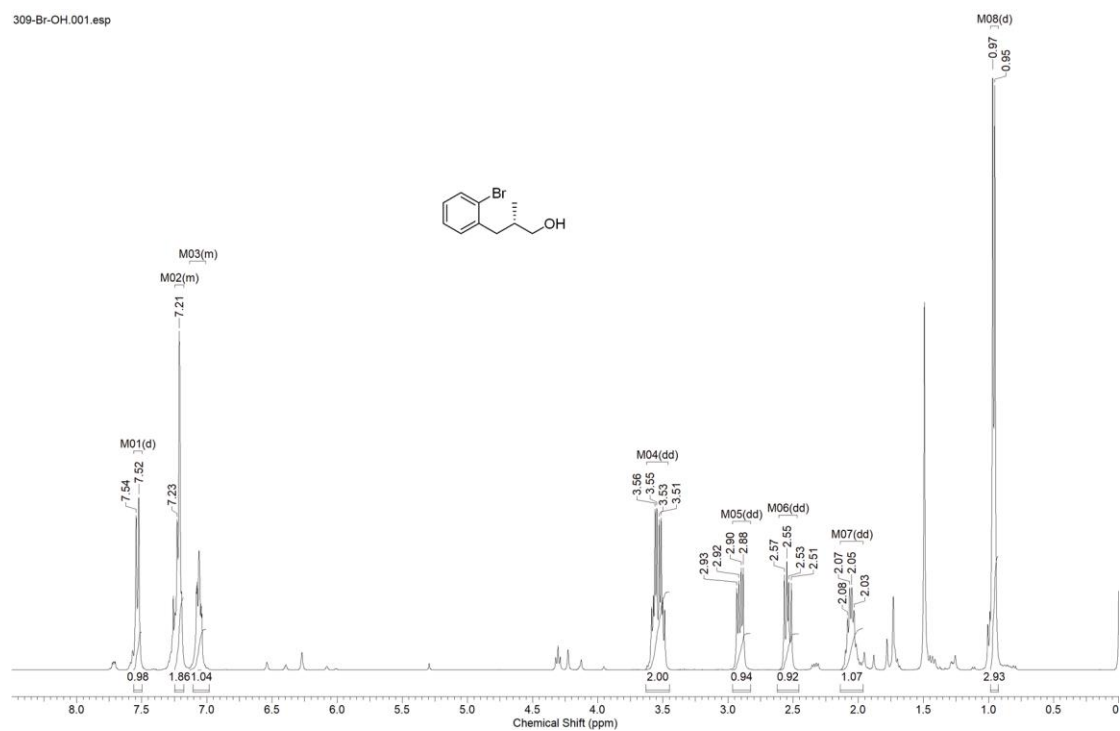

309-Br-OH.002.esp

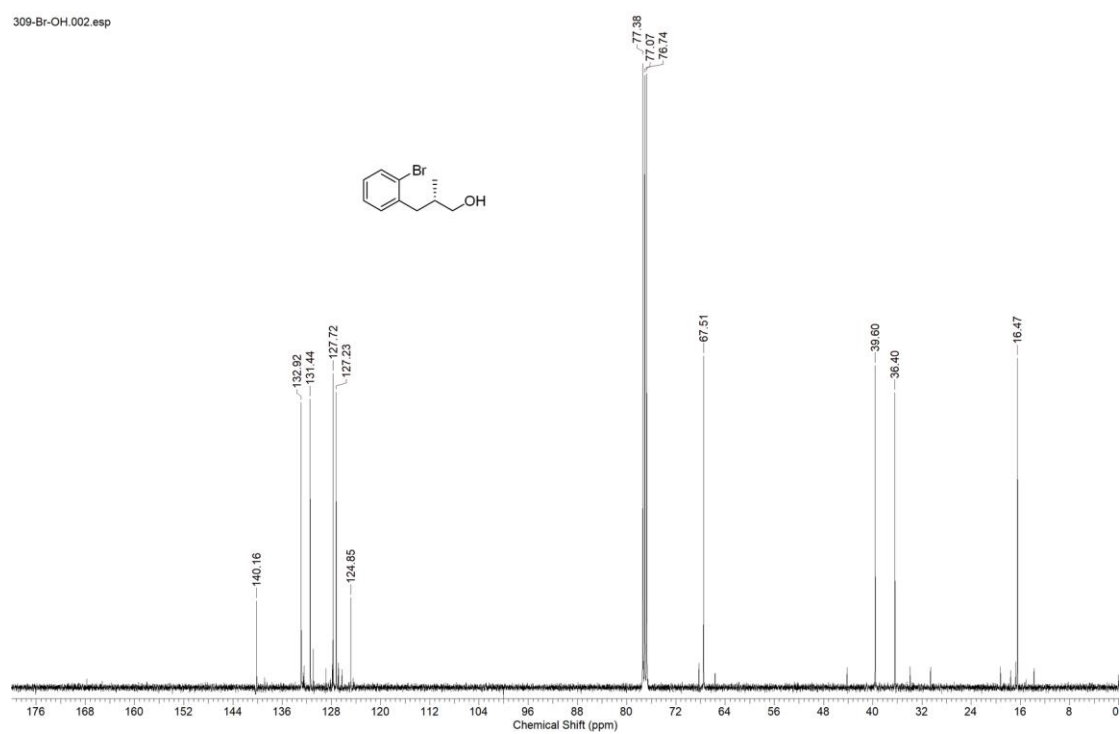

$^1\text{H}$ -NMR spectra and  $^{13}\text{C}$ -NMR spectra of (S)-3-(2-chlorophenyl)-2-methylpropan-1-ol((S)-3a')

312-Br-OH.001.esp

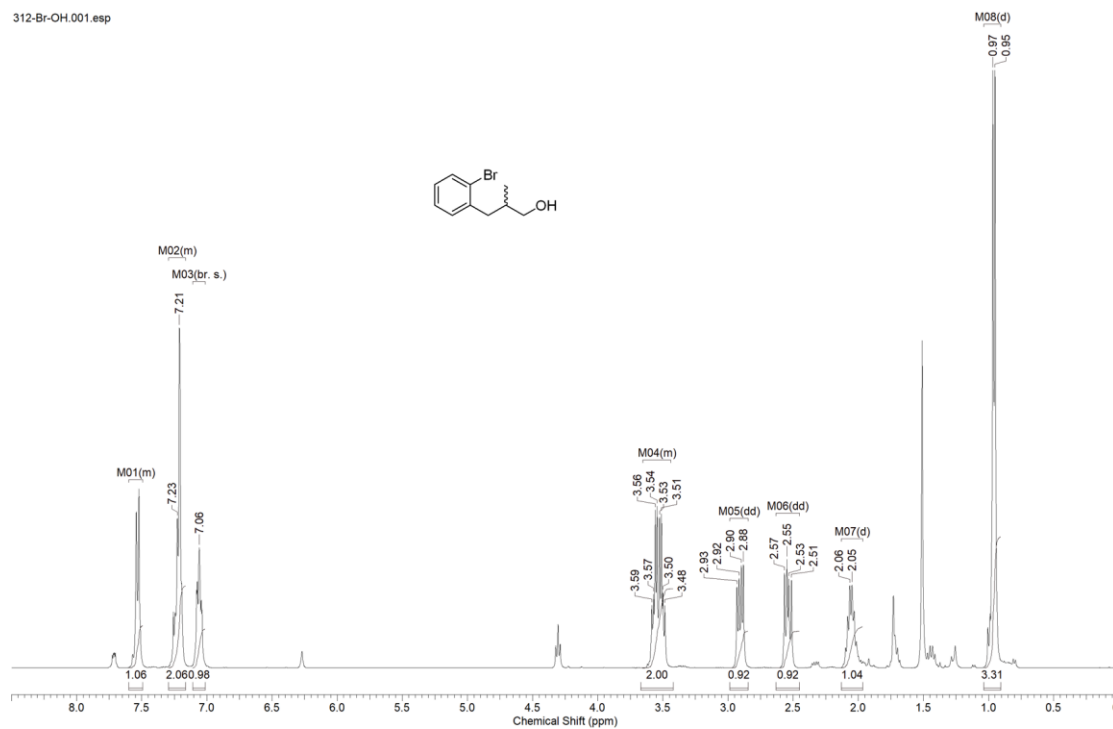

312-Br-OH.002.esp

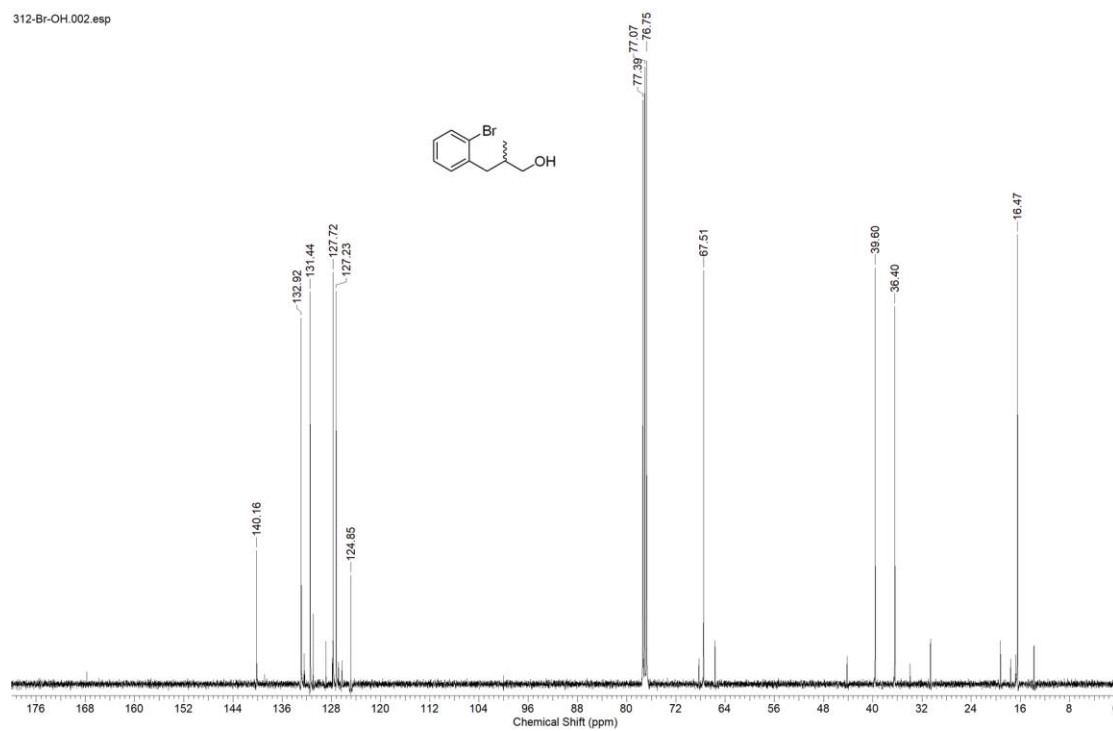

<sup>1</sup>H-NMR spectra and <sup>13</sup>C-NMR spectra of 3-(2-chlorophenyl)-2-methylpropan-1-ol(Rac-3a')



1.001.esp

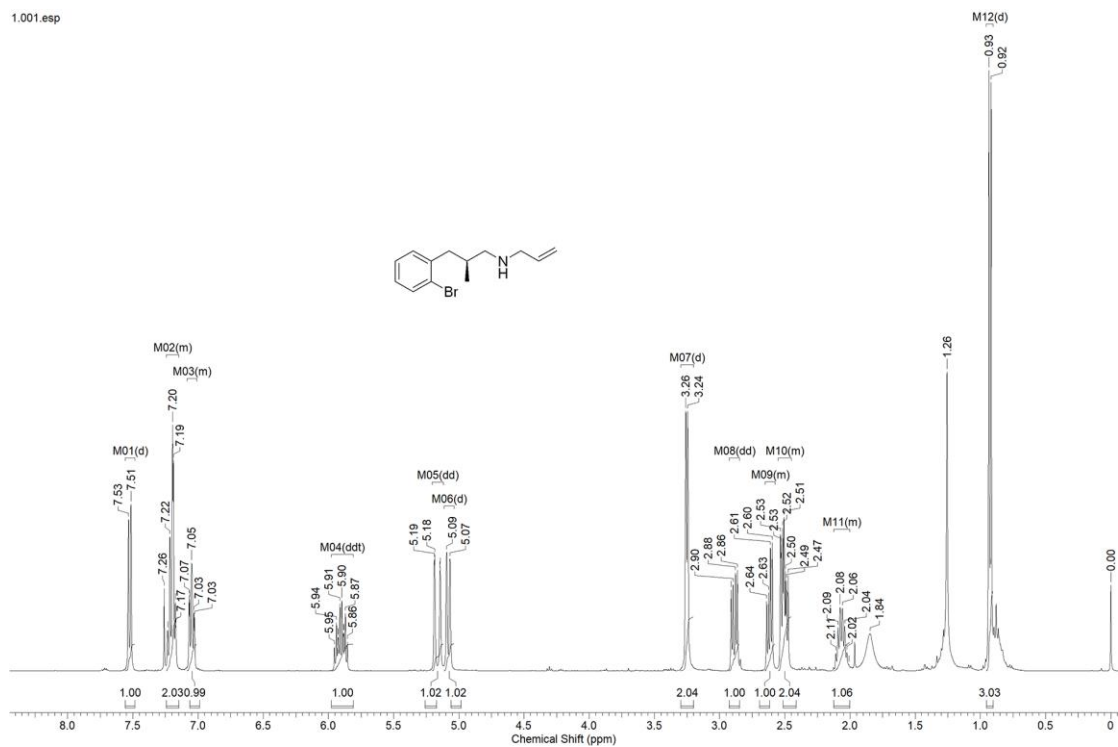

2.001.esp

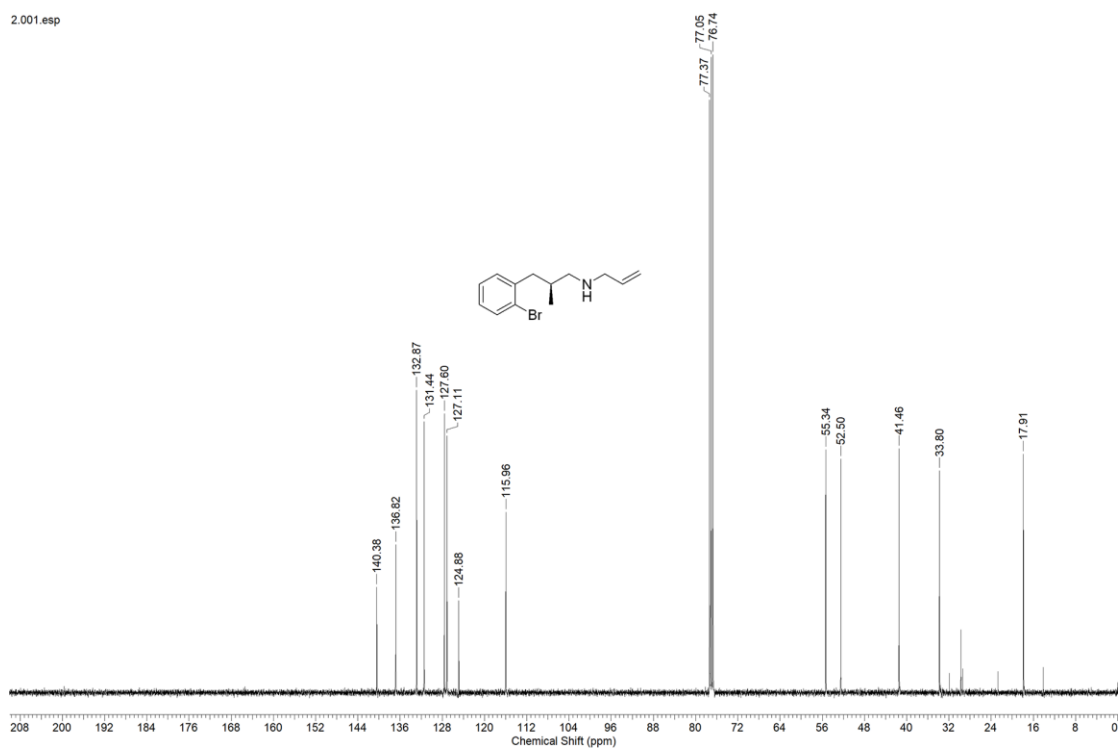

<sup>1</sup>H-NMR spectra and <sup>13</sup>C-NMR spectra of

(*S*)-*N*-(3-(2-bromophenyl)-2-methylpropyl)prop-2-en-1-amine ((*S*)-**4a**)

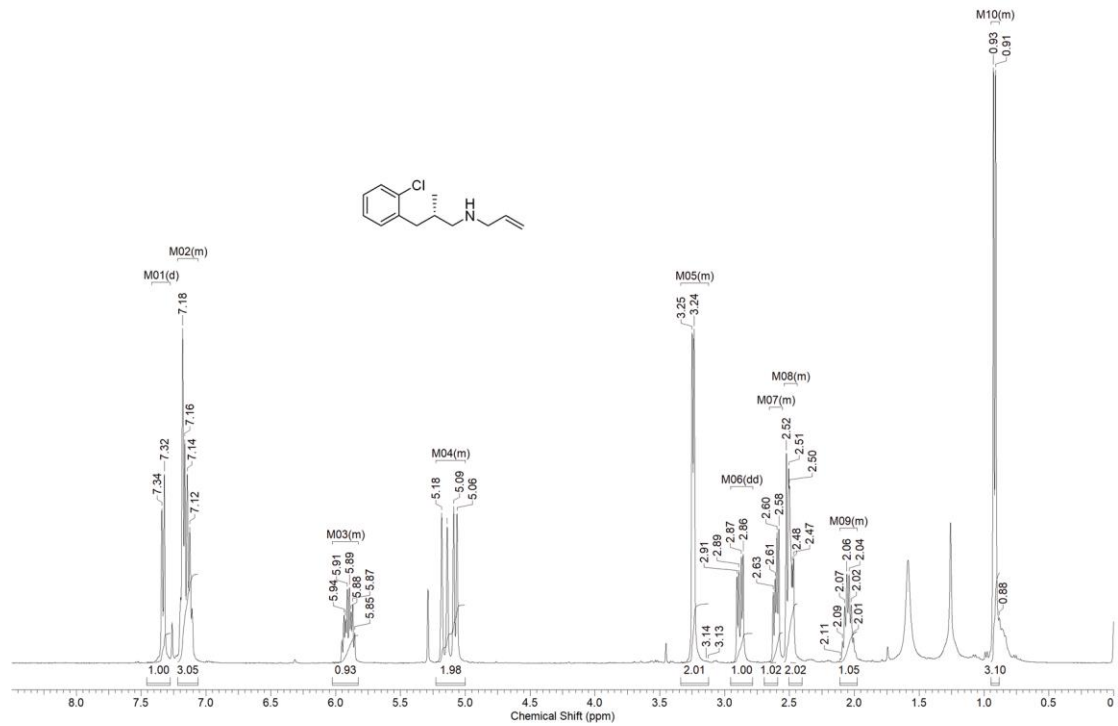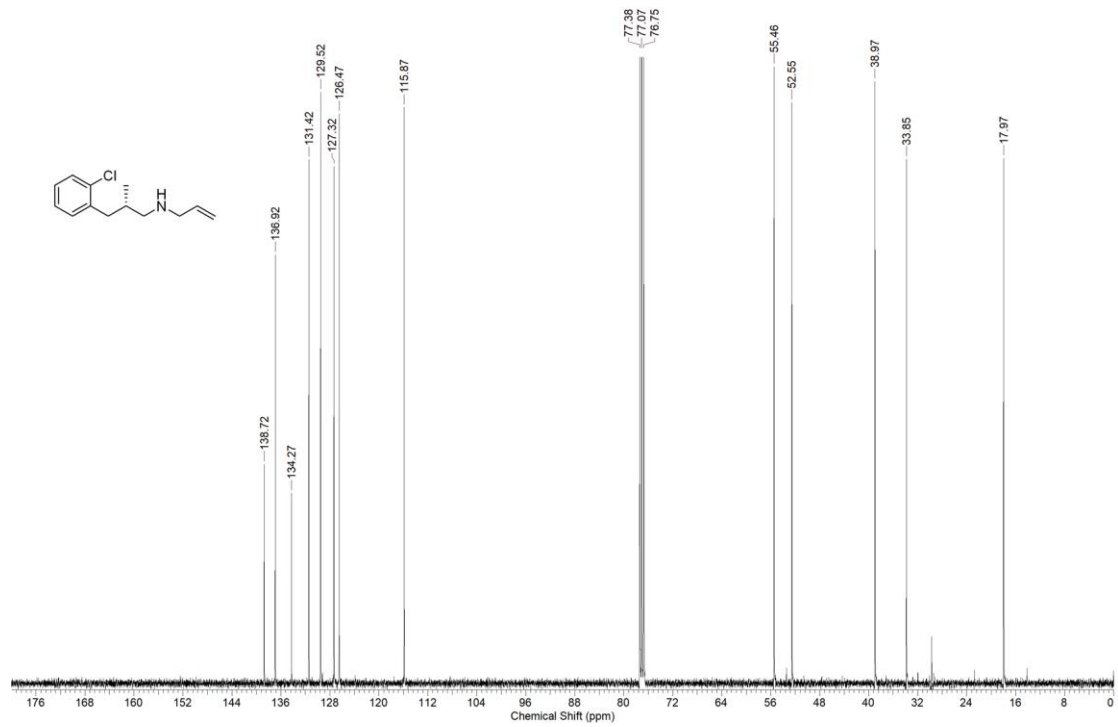

<sup>1</sup>H-NMR spectra and <sup>13</sup>C-NMR spectra of

(S)-N-(3-(2-chlorophenyl)-2-methylpropyl)prop-2-en-1-amine ((S)-4b)

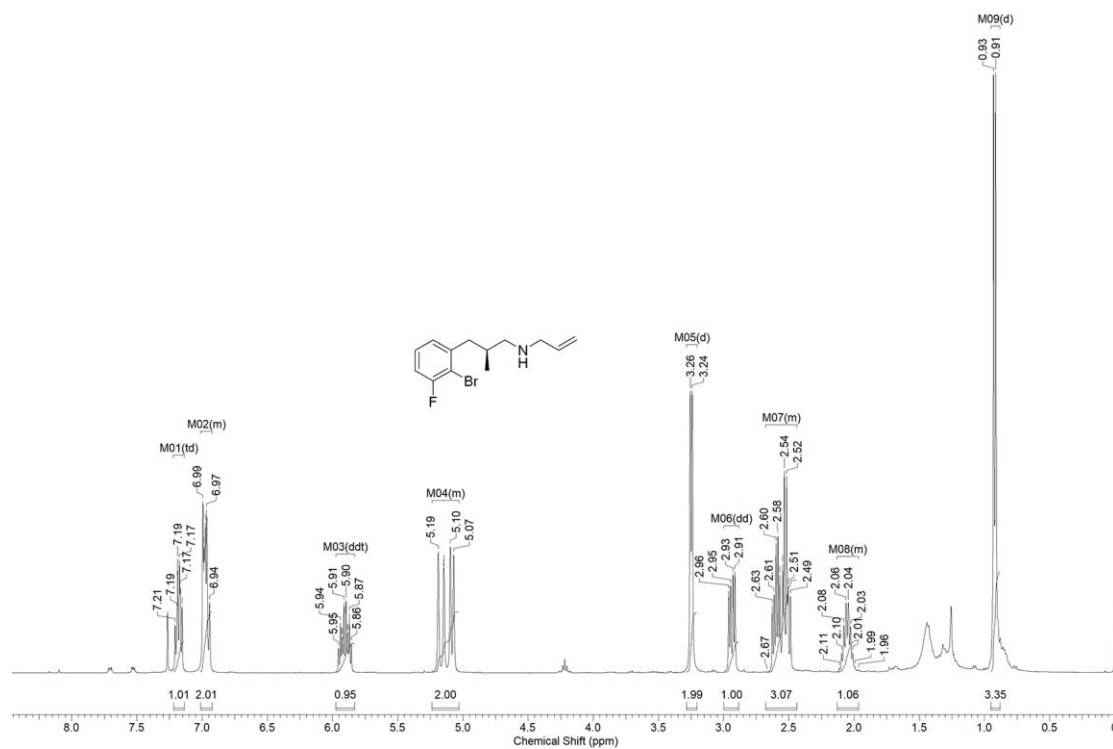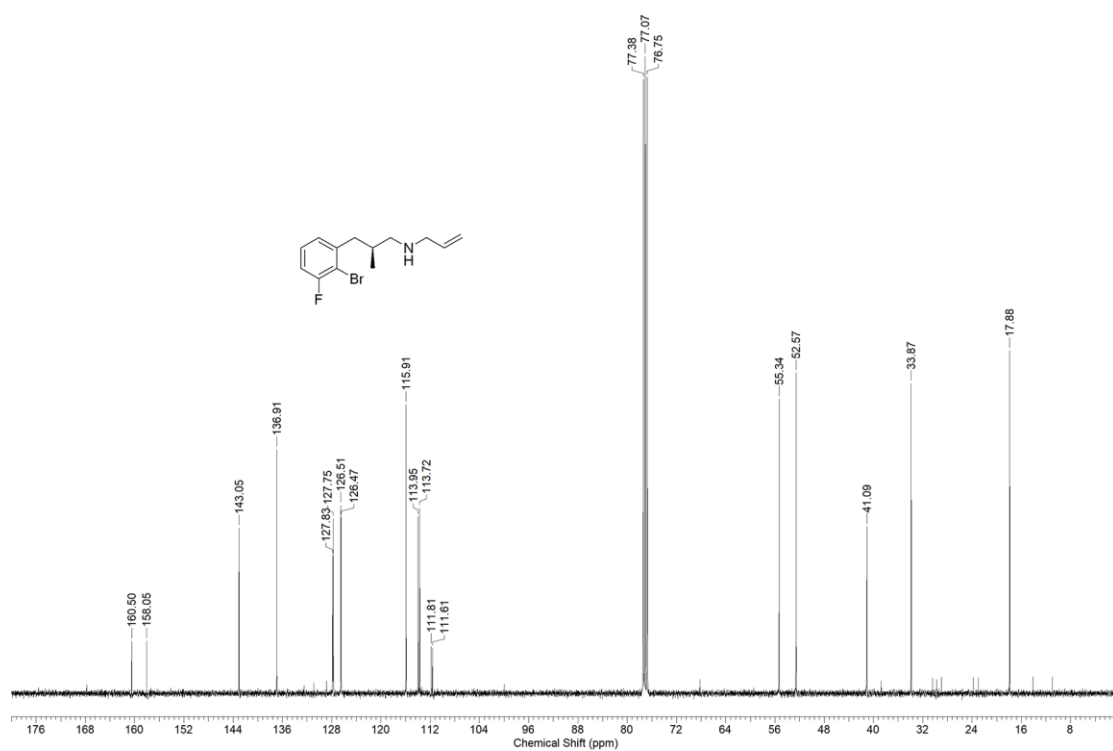

<sup>1</sup>H-NMR spectra and <sup>13</sup>C-NMR spectra of

(S)-N-(3-(2-bromo-3-fluorophenyl)-2-methylpropyl)prop-2-en-1-amine ((S)-4c)

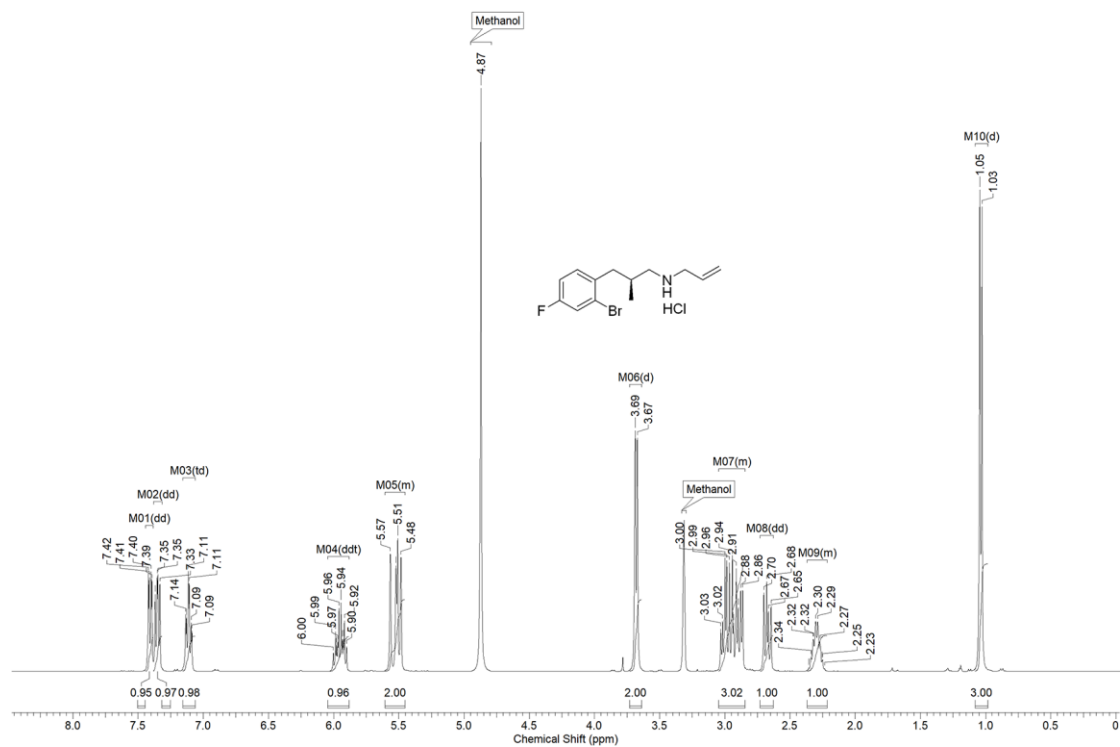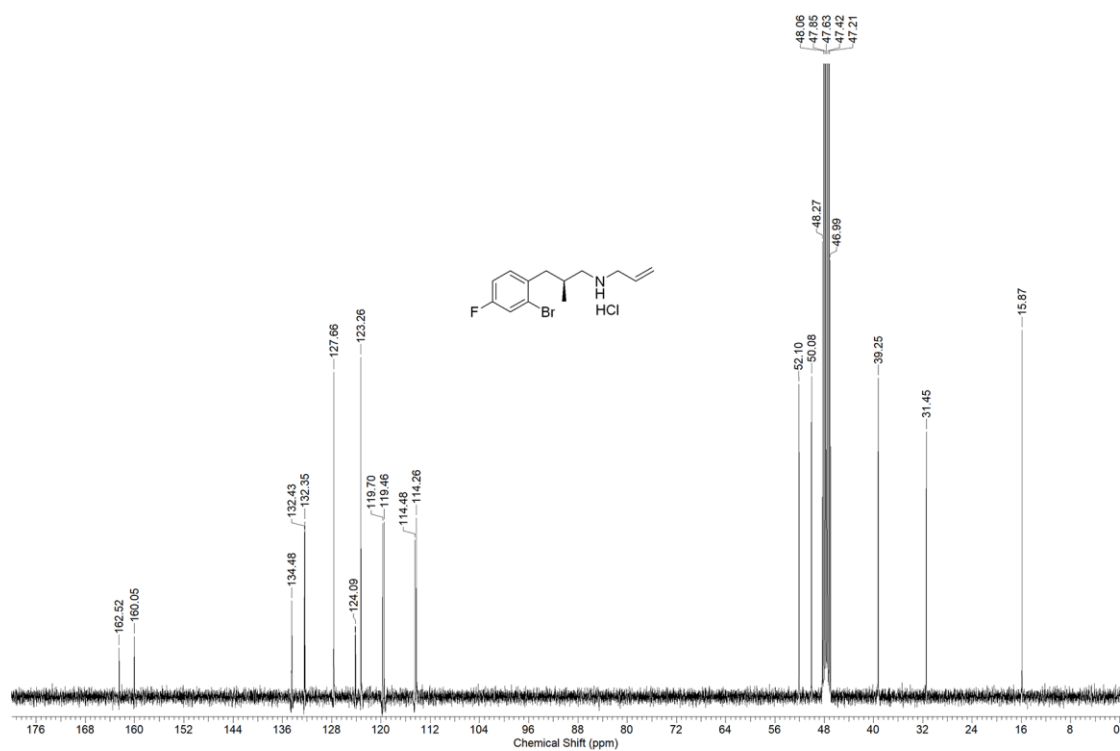

<sup>1</sup>H-NMR spectra and <sup>13</sup>C-NMR spectra of (*S*)-*N*-(3-(2-bromo-4-fluorophenyl)-2-methylpropyl)prop-2-en-1-amine hydrochloride ((*S*)-4d)

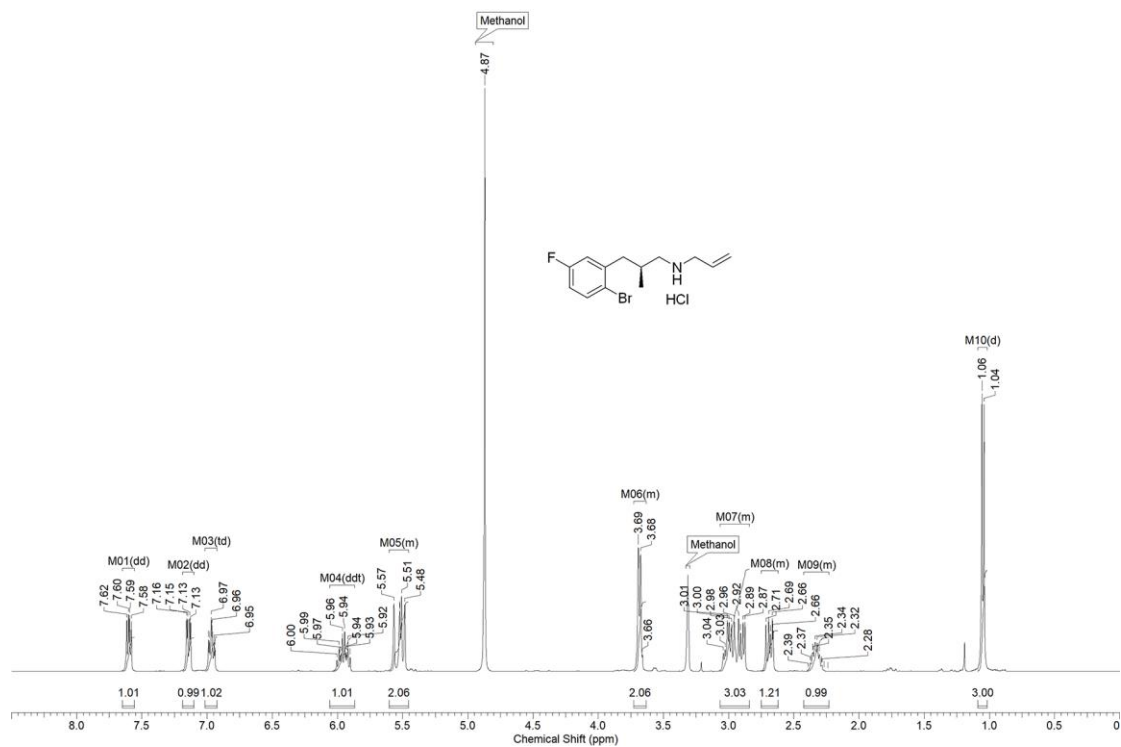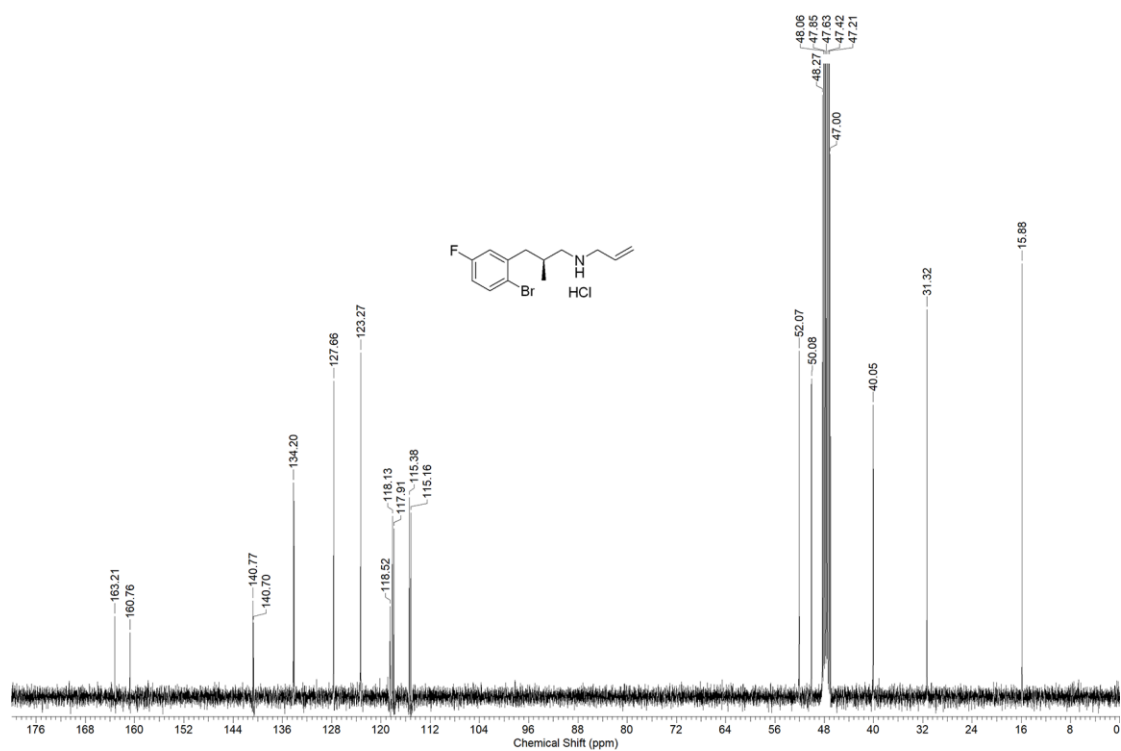

$^1\text{H}$ -NMR spectra and  $^{13}\text{C}$ -NMR spectra of (*S*)-*N*-(3-(2-bromo-5-fluorophenyl)-2-methylpropyl)prop-2-en-1-amine hydrochloride ((*S*)-**4e**)

one pot 309-R9 6F.001.esp

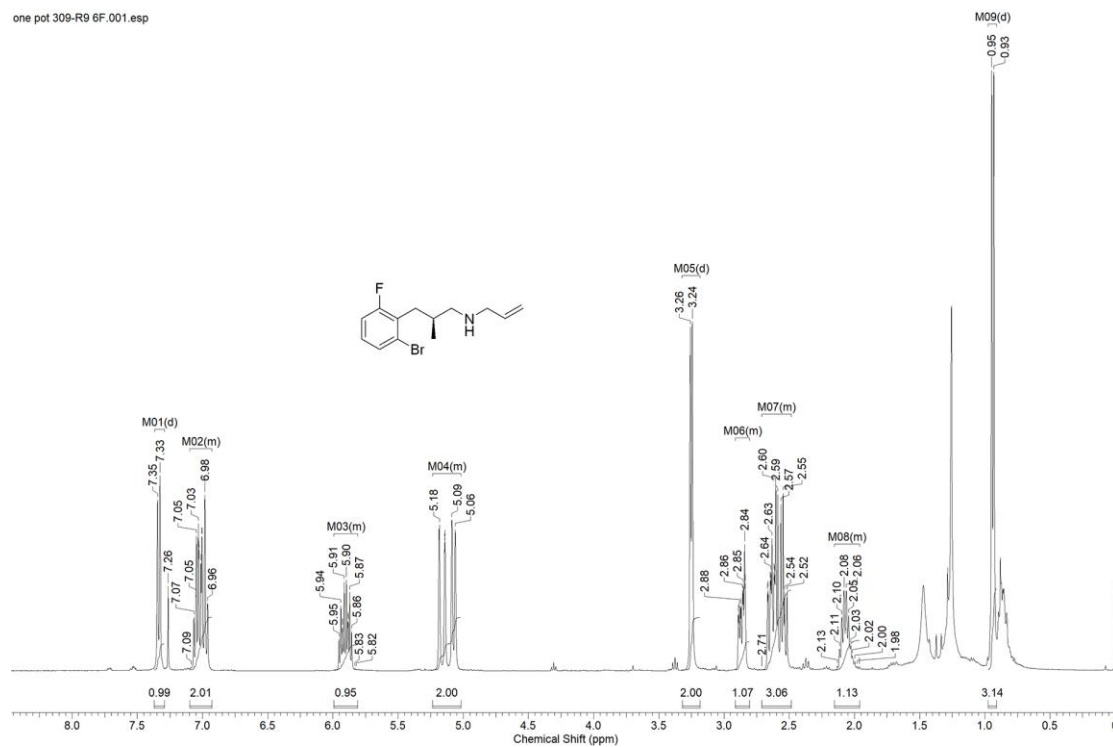

one pot 309-R9 6F.002.esp

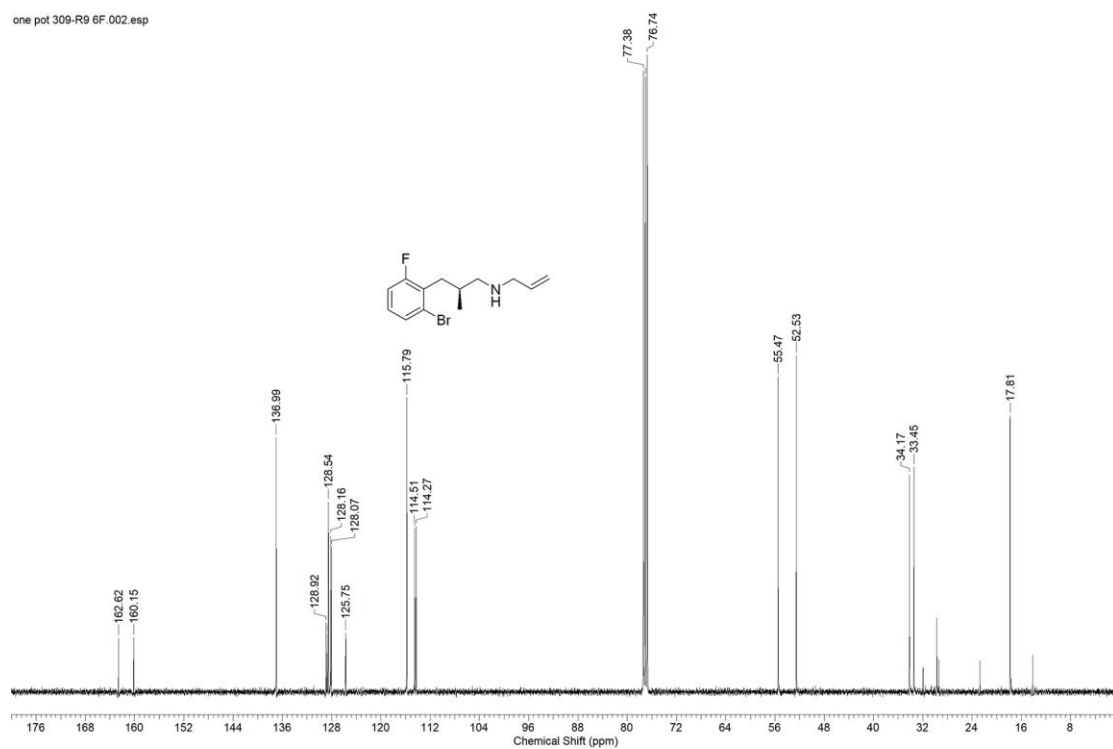

<sup>1</sup>H-NMR spectra and <sup>13</sup>C-NMR spectra of

(*S*)-*N*-(3-(2-bromo-6-fluorophenyl)-2-methylpropyl)prop-2-en-1-amine (*S*)-**4f**

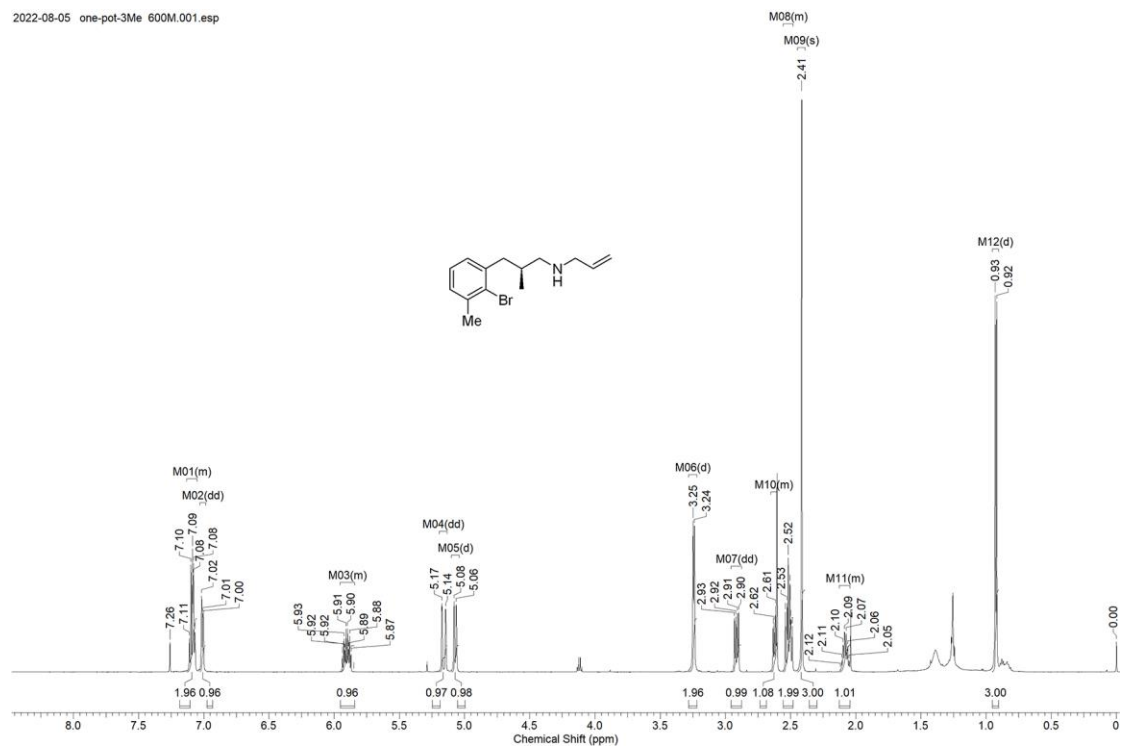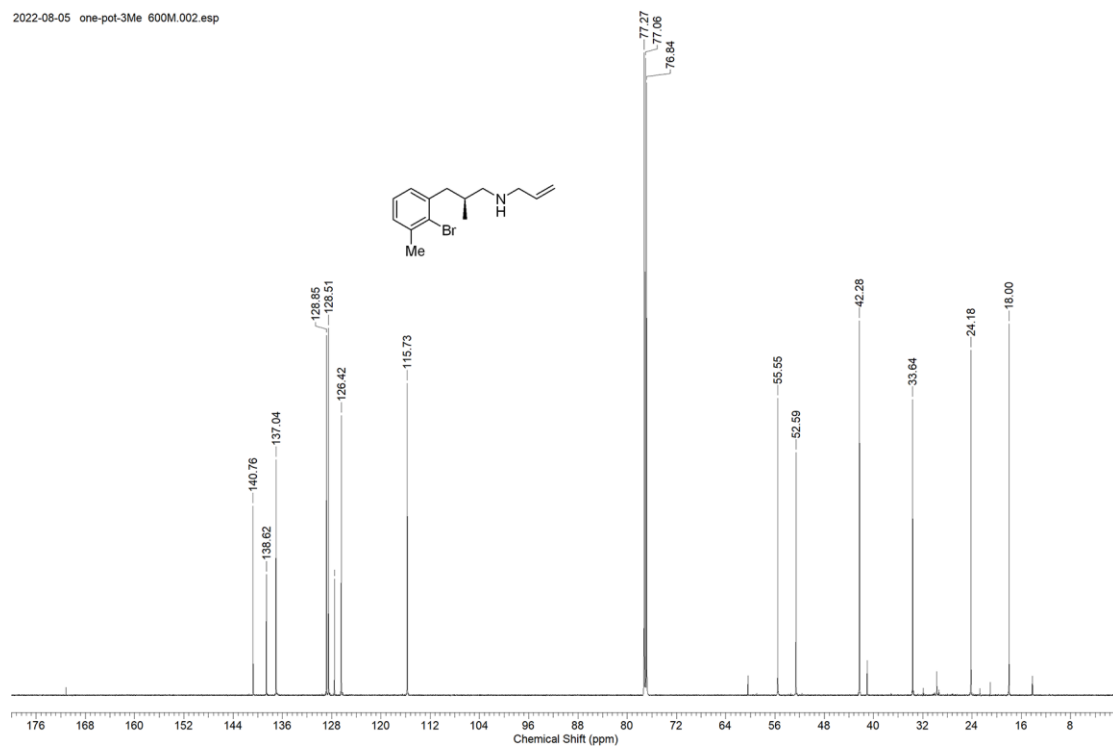

<sup>1</sup>H-NMR spectra and <sup>13</sup>C-NMR spectra of

(S)-N-(3-(2-bromo-3-methylphenyl)-2-methylpropyl)prop-2-en-1-amine ((S)-4g)

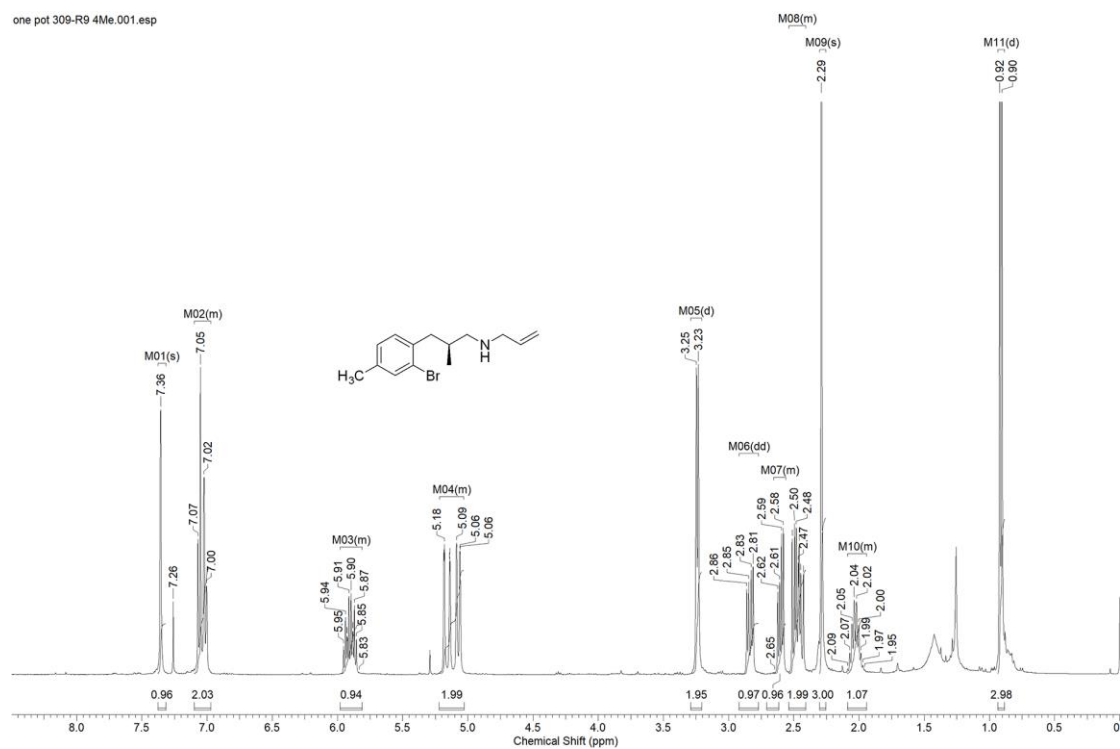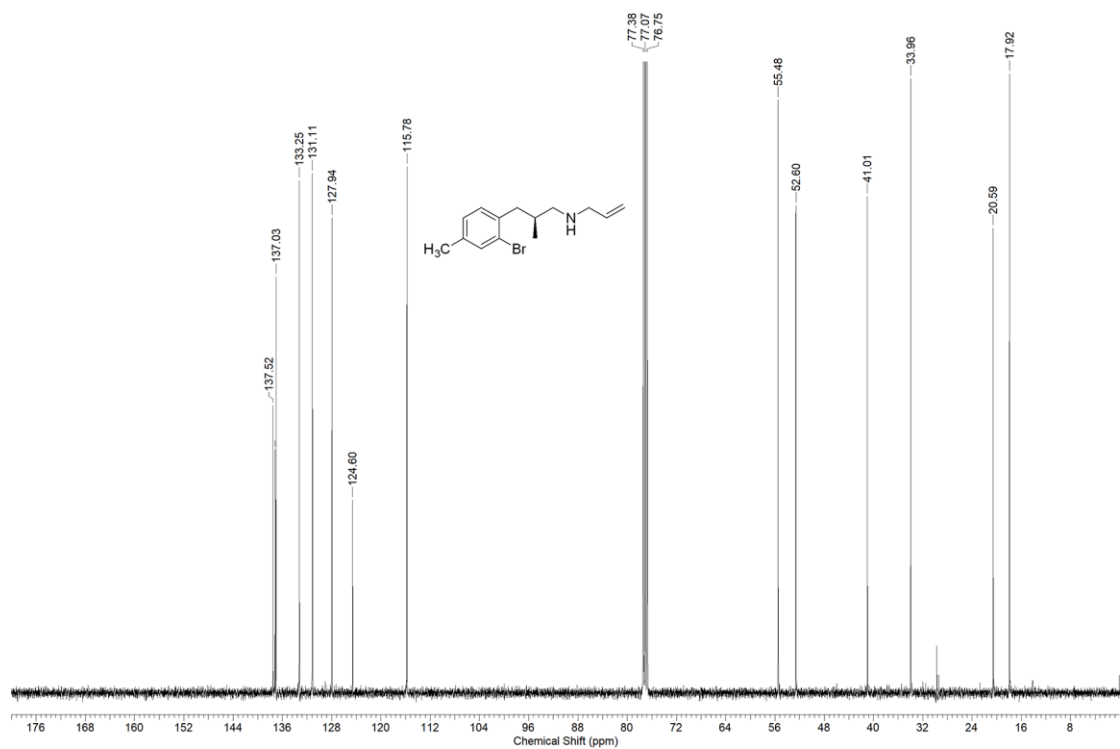

<sup>1</sup>H-NMR spectra and <sup>13</sup>C-NMR spectra of

(S)-N-(3-(2-bromo-4-methylphenyl)-2-methylpropyl)prop-2-en-1-amine ((S)-4h)



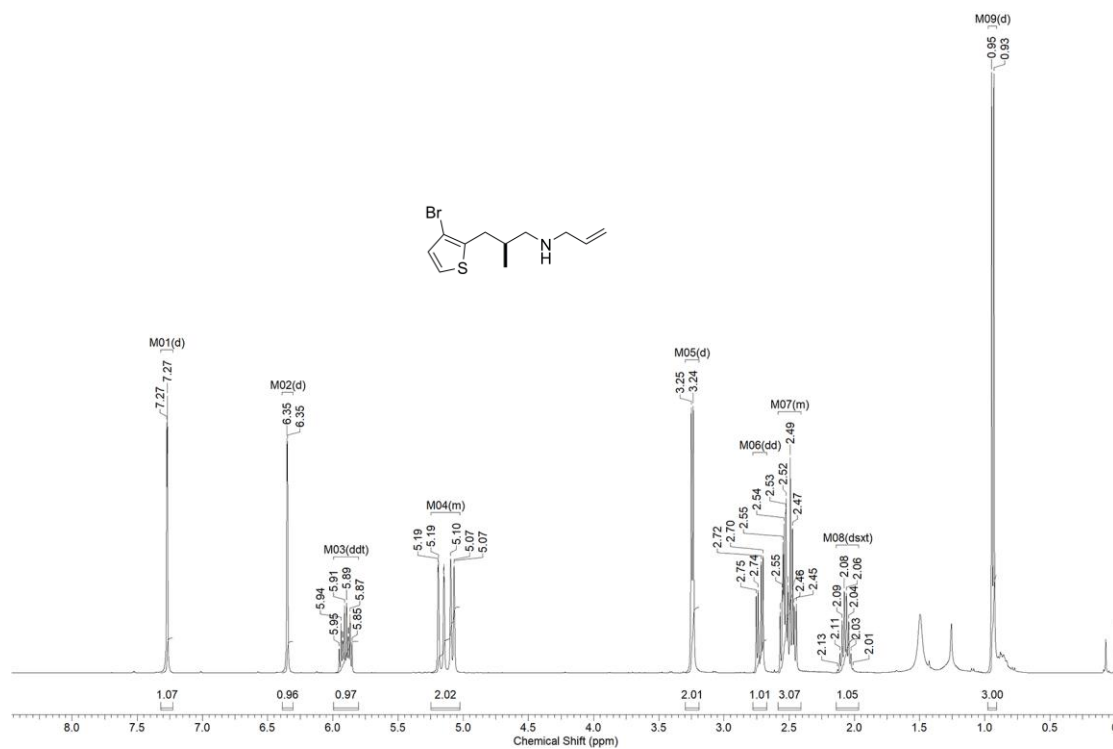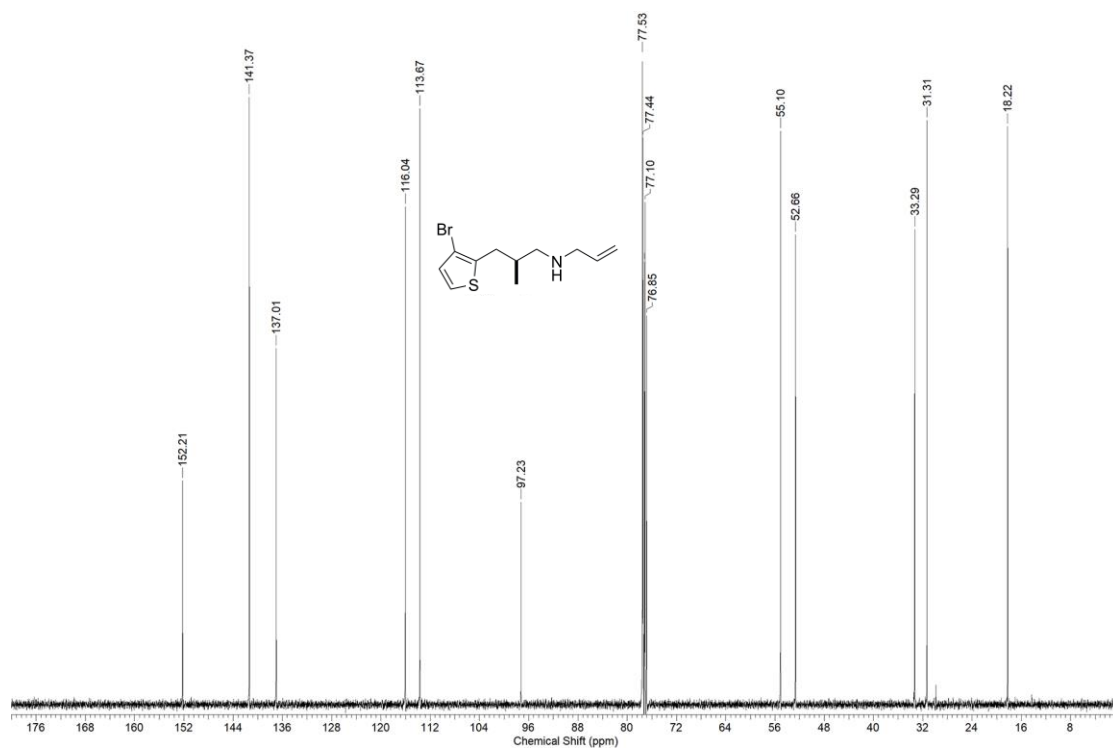

<sup>1</sup>H-NMR spectra and <sup>13</sup>C-NMR spectra of

(*S*)-*N*-(3-(3-bromothiophen-2-yl)-2-methylpropyl)prop-2-en-1-amine ((*S*)-**4i**)

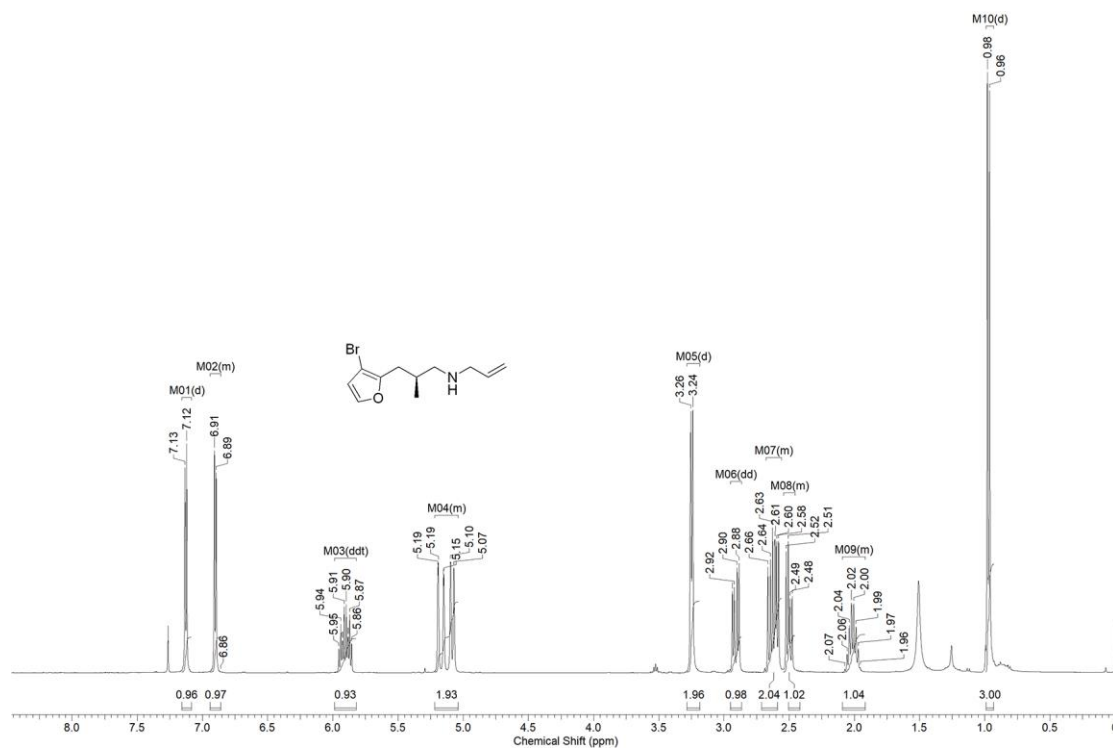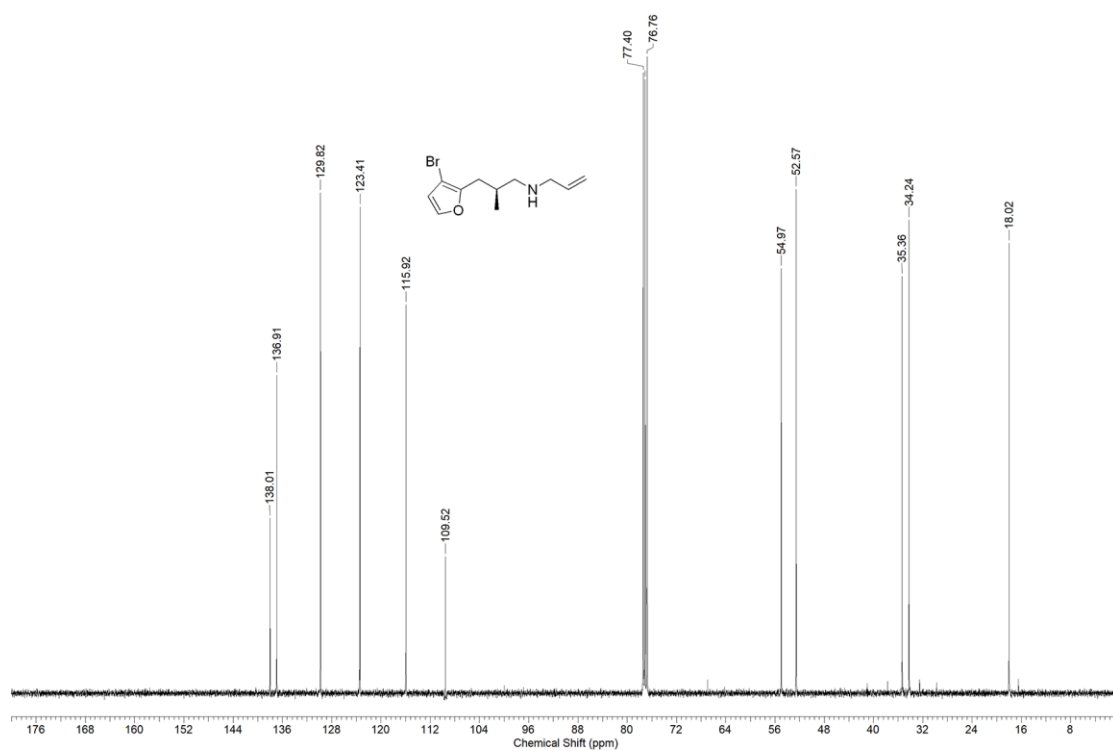

<sup>1</sup>H-NMR spectra and <sup>13</sup>C-NMR spectra of

(*S*)-*N*-(3-(3-bromofuran-2-yl)-2-methylpropyl)prop-2-en-1-amine ((*S*)-**4j**)

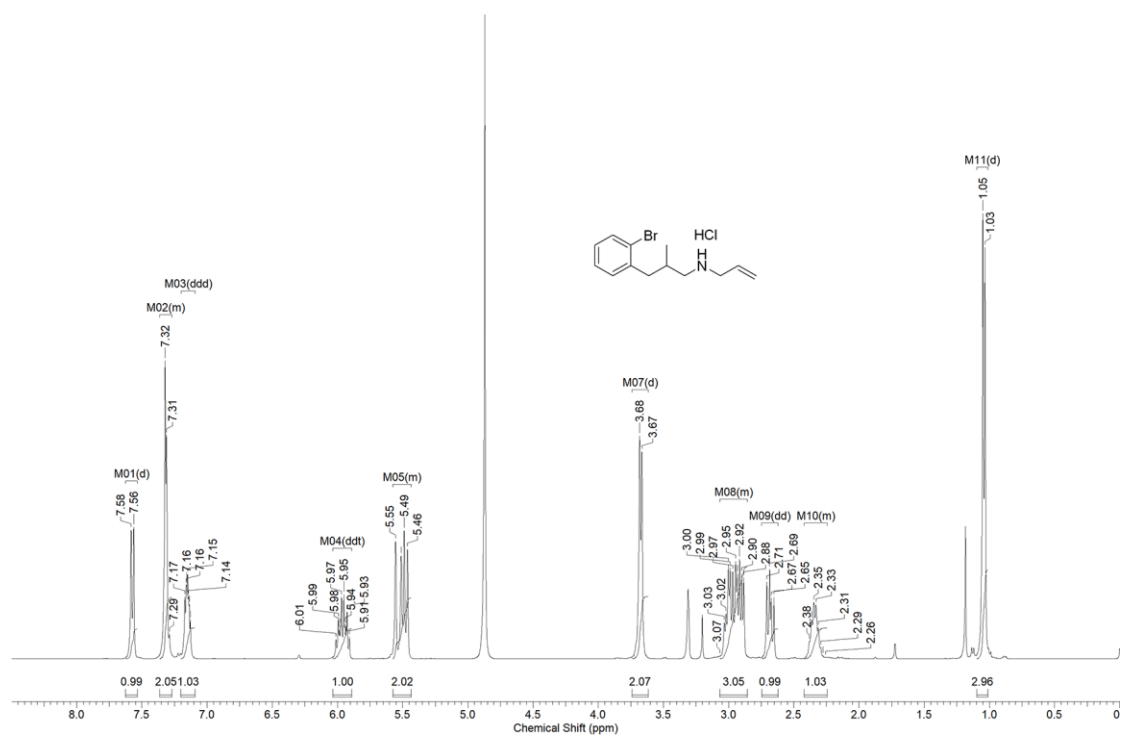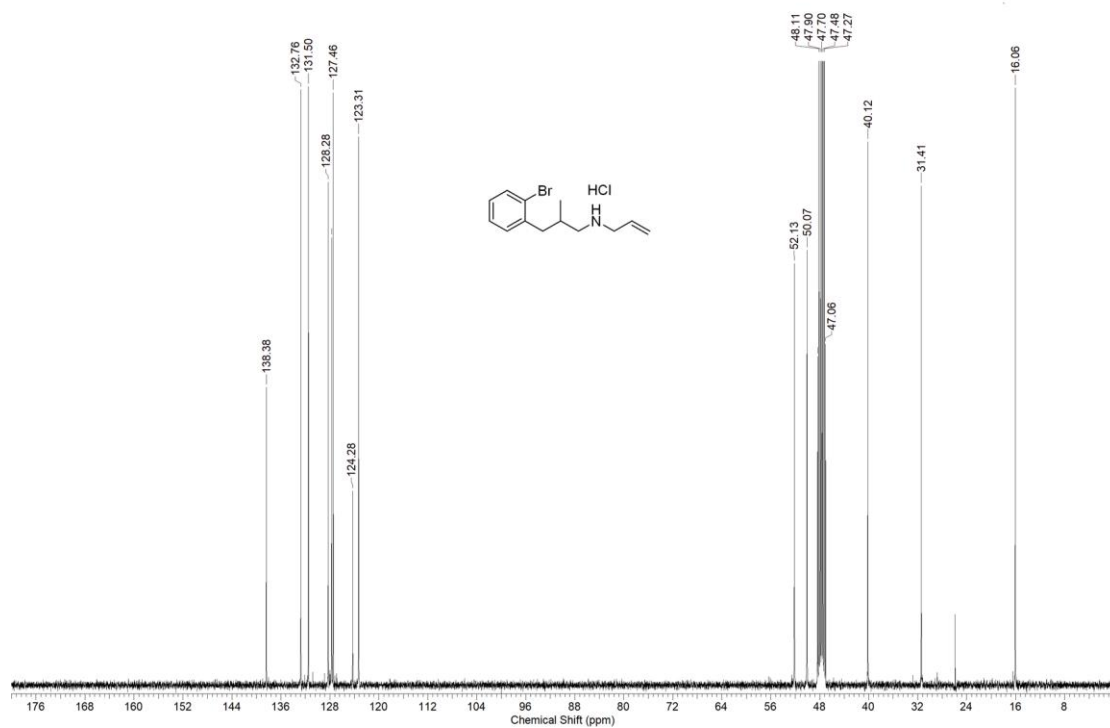

$^1\text{H-NMR}$  spectra and  $^{13}\text{C-NMR}$  spectra of

*N*-(3-(2-bromophenyl)-2-methylpropyl)prop-2-en-1-amine (Rac-4a)

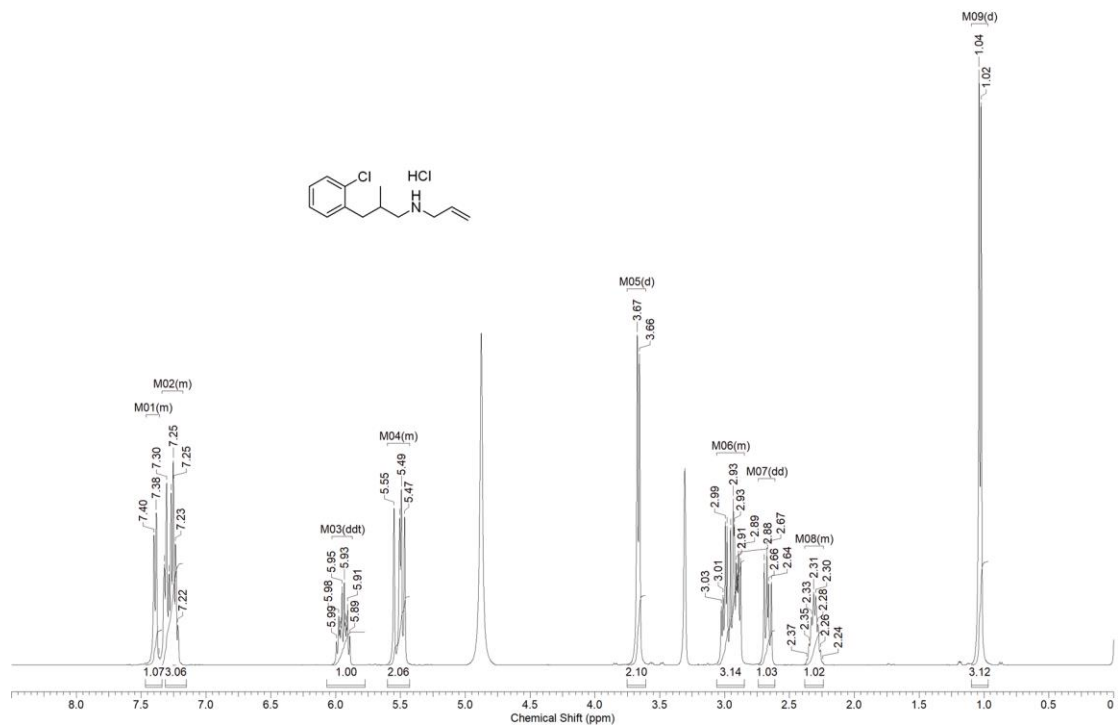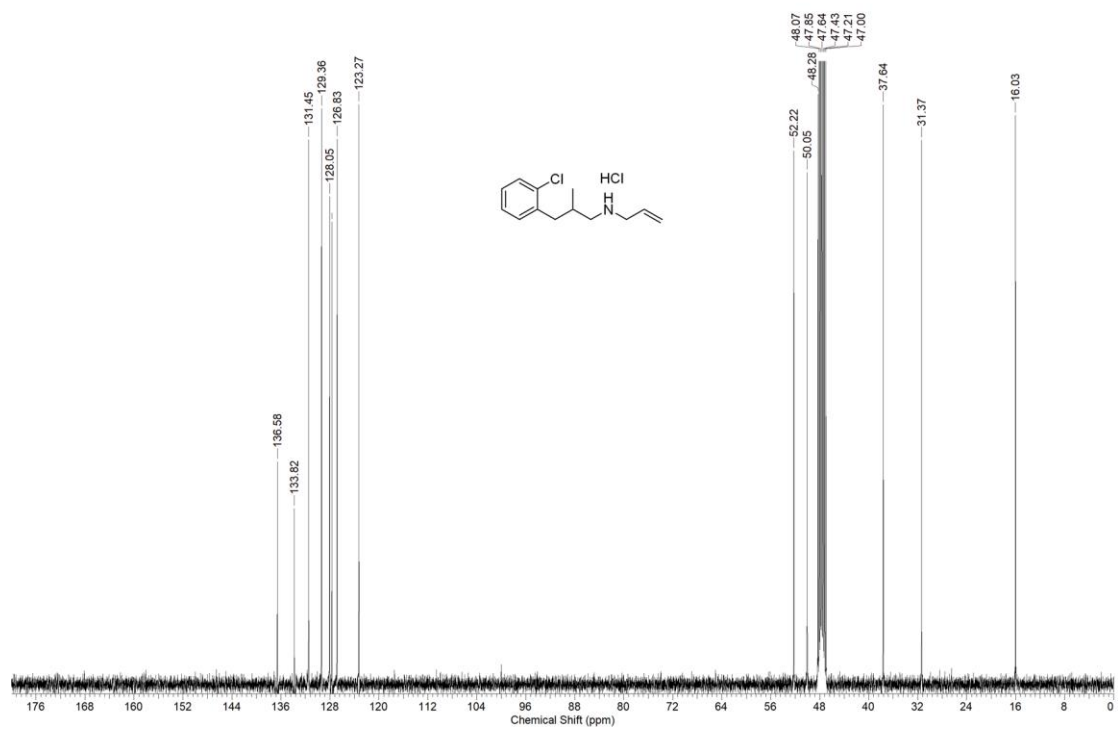

<sup>1</sup>H-NMR spectra and <sup>13</sup>C-NMR spectra of

*N*-(2-chlorophenyl)-2-methylpropylprop-2-en-1-amine (Rac-4b)

Rac-3F.001.esp

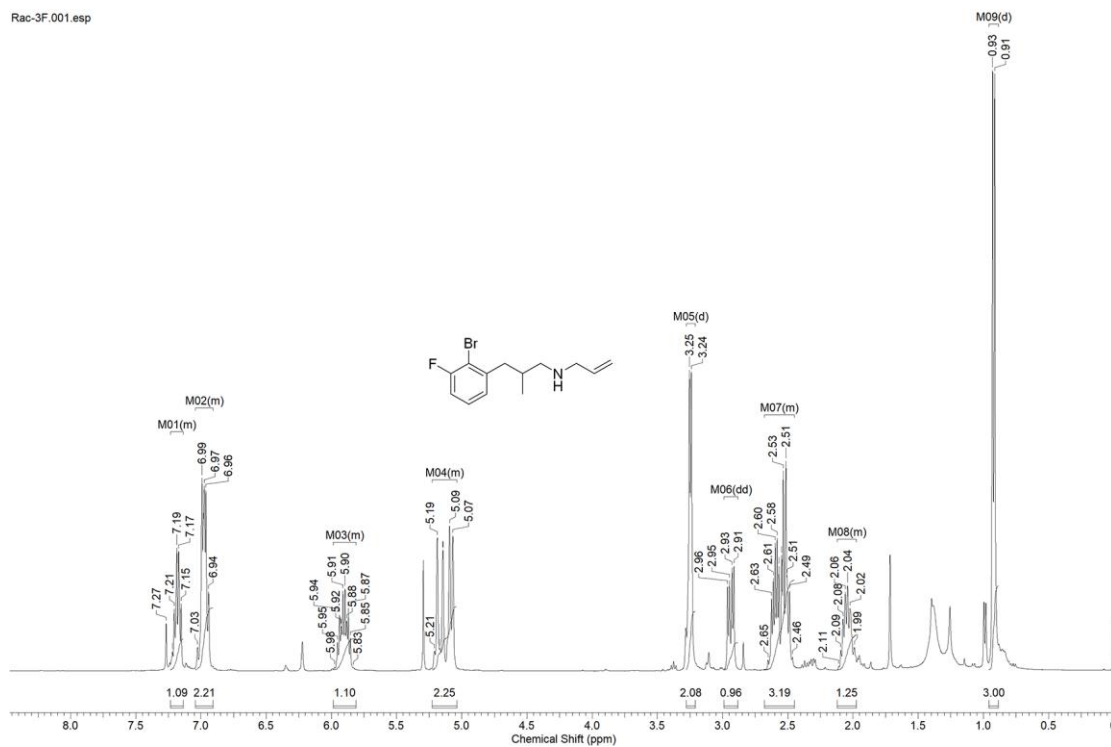

Rac-3F.002.esp

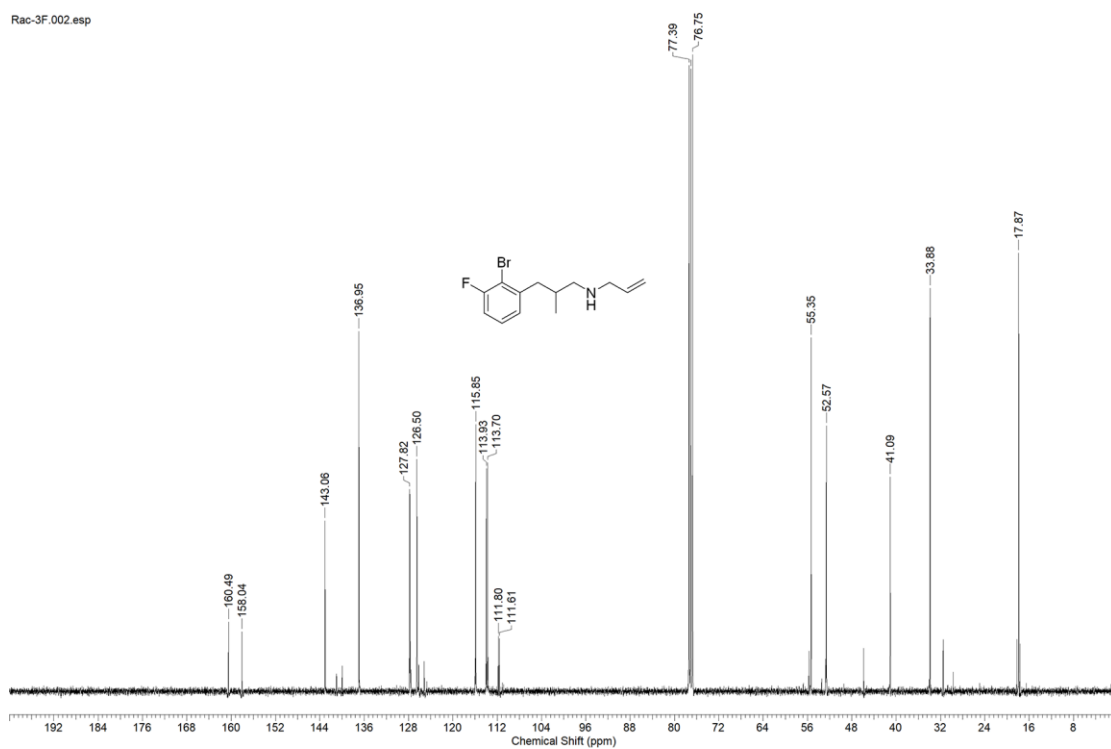

<sup>1</sup>H-NMR spectra and <sup>13</sup>C-NMR spectra of

*N*-(3-(2-bromo-3-fluorophenyl)-2-methylpropyl)prop-2-en-1-amine (**Rac-4c**)

Rac-4F.001.esp

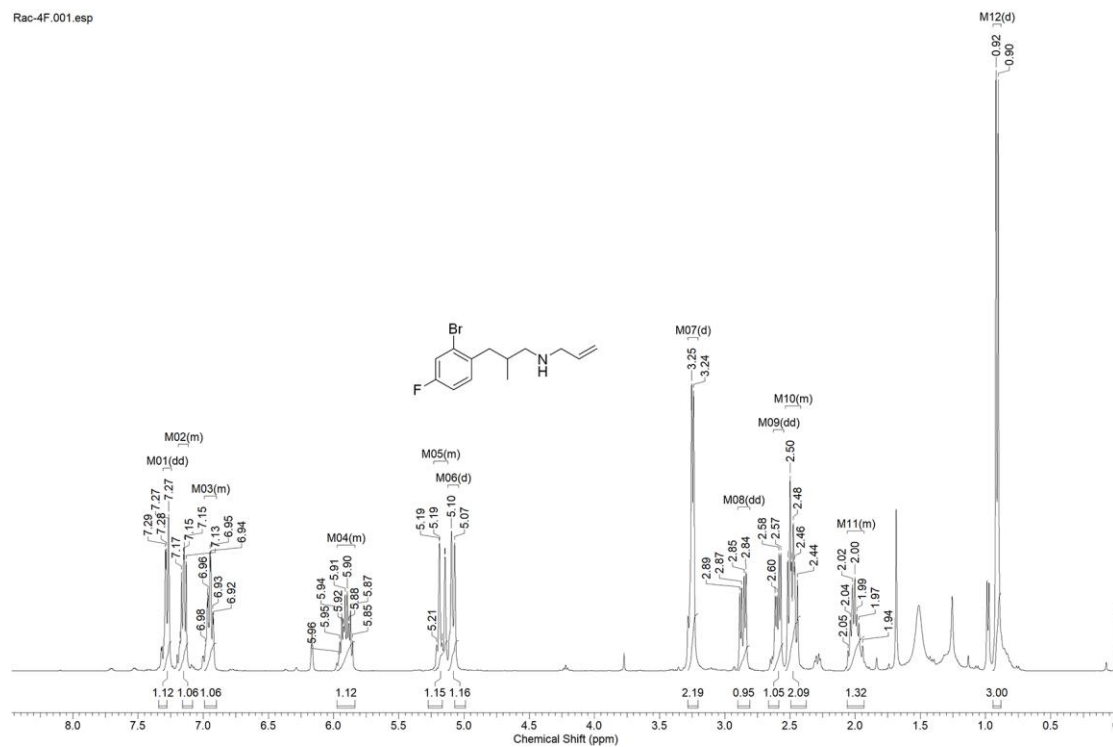

Rac-4F.002.esp

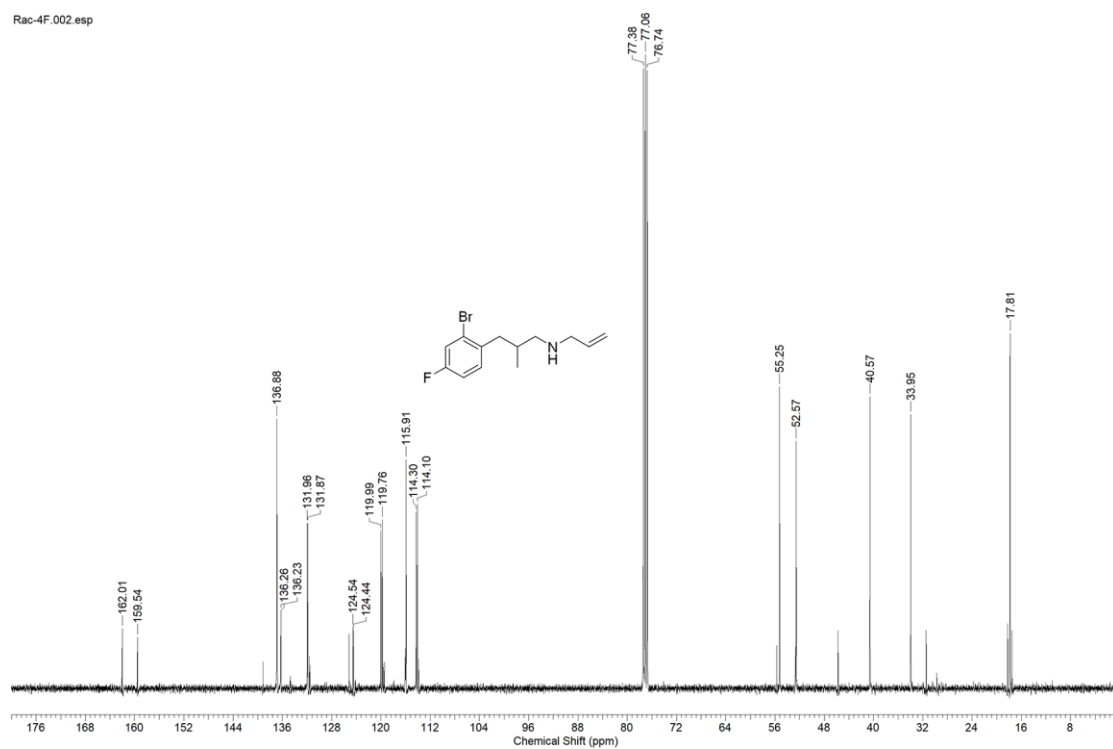

<sup>1</sup>H-NMR spectra and <sup>13</sup>C-NMR spectra of

*N*-(3-(2-bromo-4-fluorophenyl)-2-methylpropyl)prop-2-en-1-amine (**Rac-4d**)

Rac-5F.001.esp

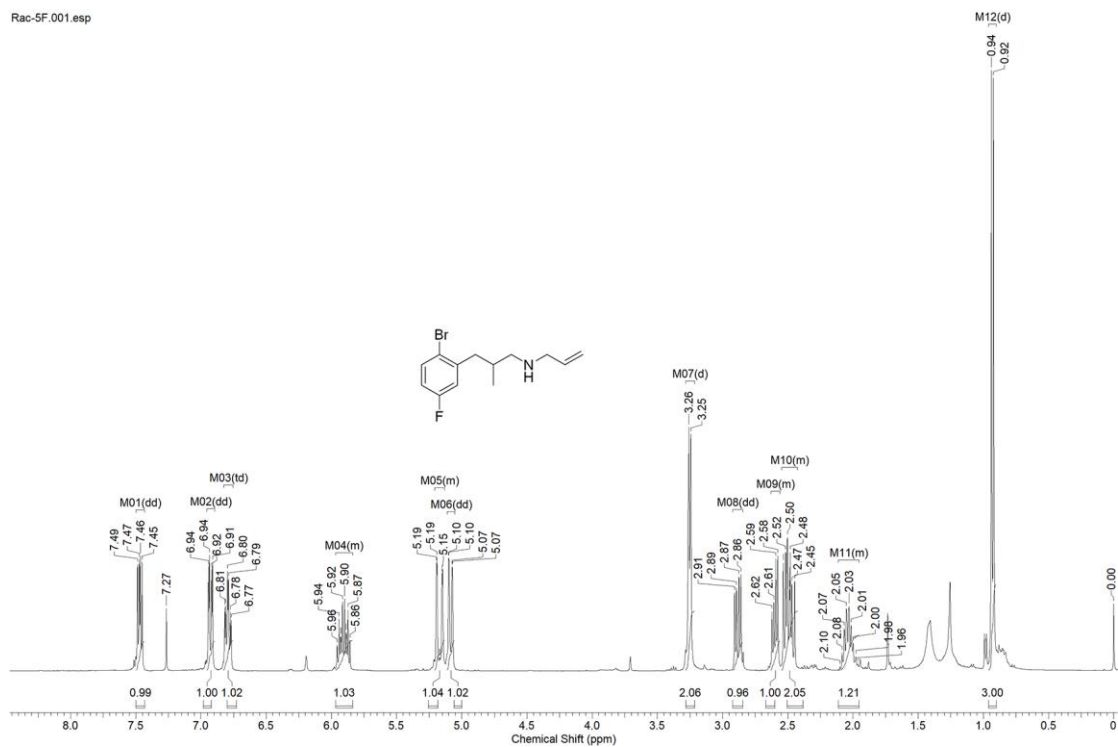

Rac-5F.002.esp

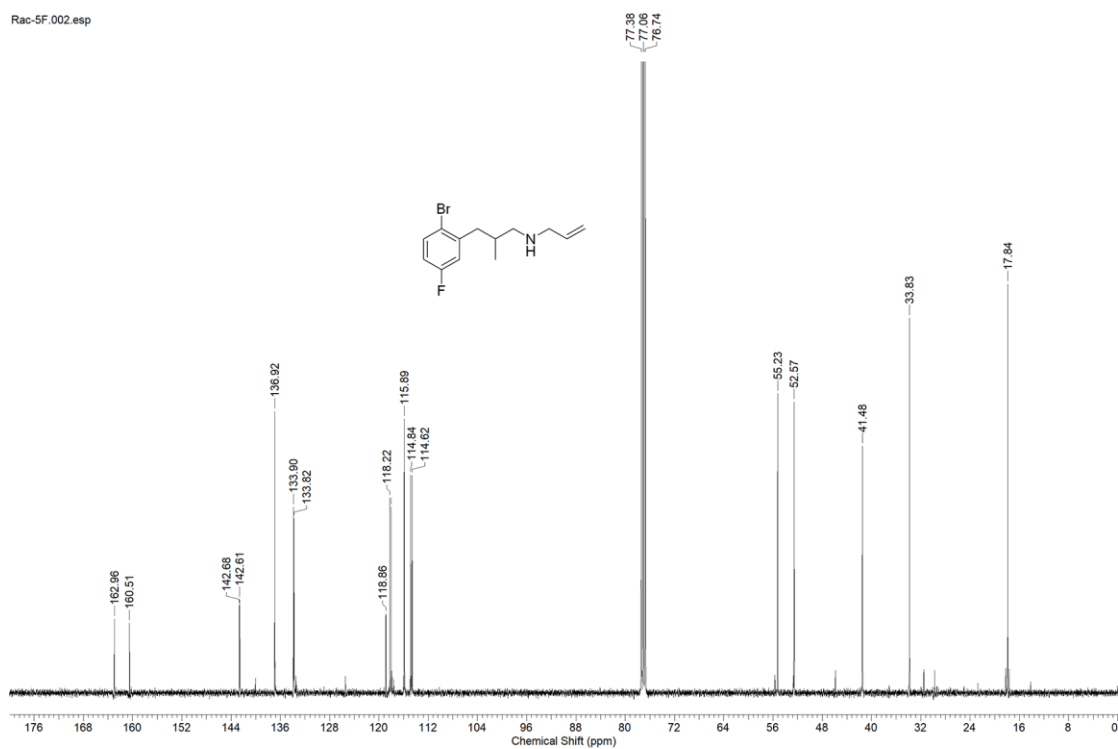

<sup>1</sup>H-NMR spectra and <sup>13</sup>C-NMR spectra of

*N*-(3-(2-bromo-5-fluorophenyl)-2-methylpropyl)prop-2-en-1-amine (Rac-4e)

Rac-6F.001.esp

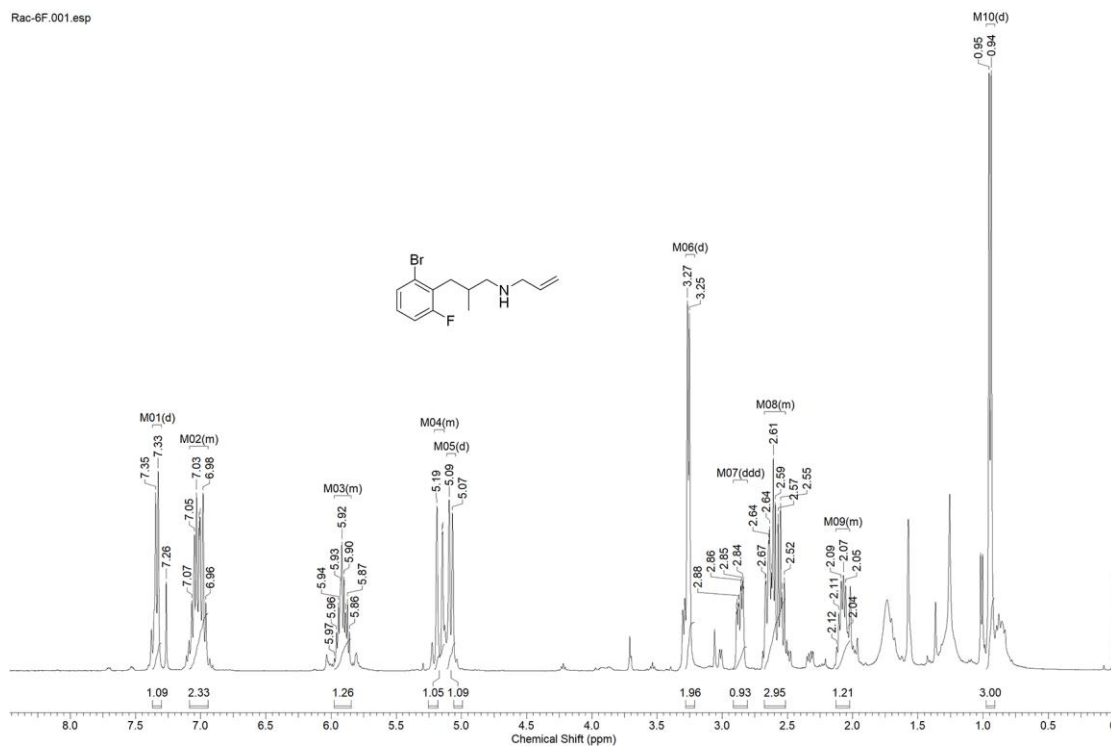

Rac-6F.002.esp

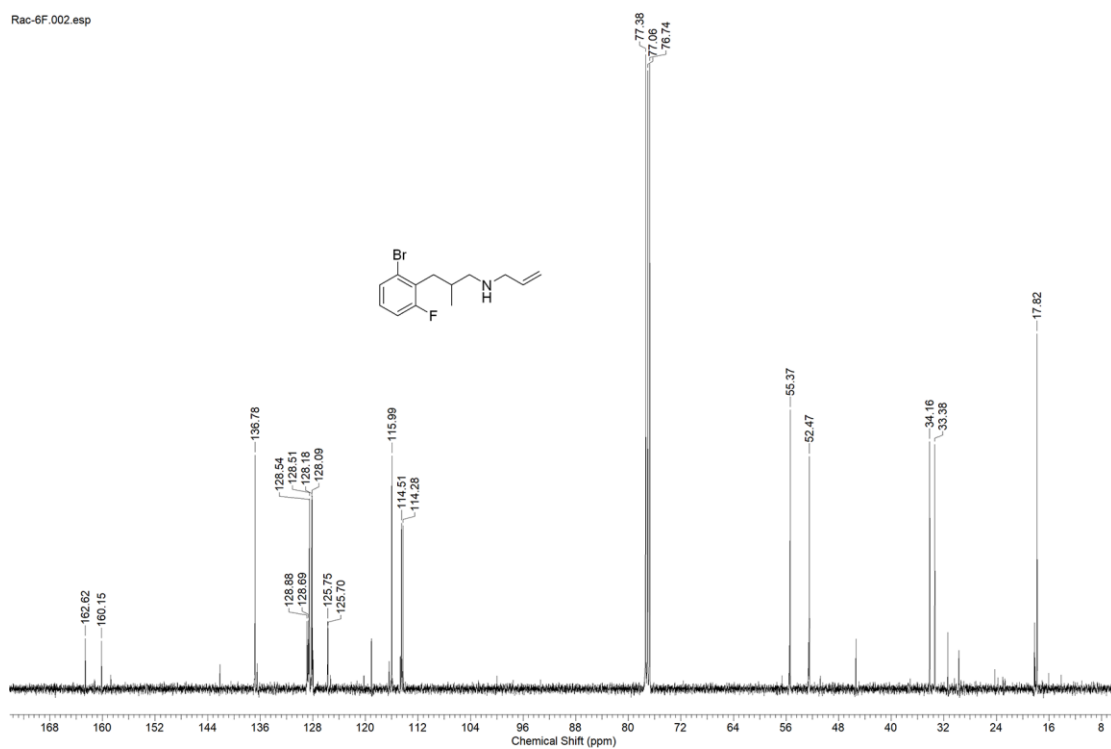

<sup>1</sup>H-NMR spectra and <sup>13</sup>C-NMR spectra of

N-(3-(2-bromo-6-fluorophenyl)-2-methylpropyl)prop-2-en-1-amine (Rac-6f)



Rac-3Me.001.esp

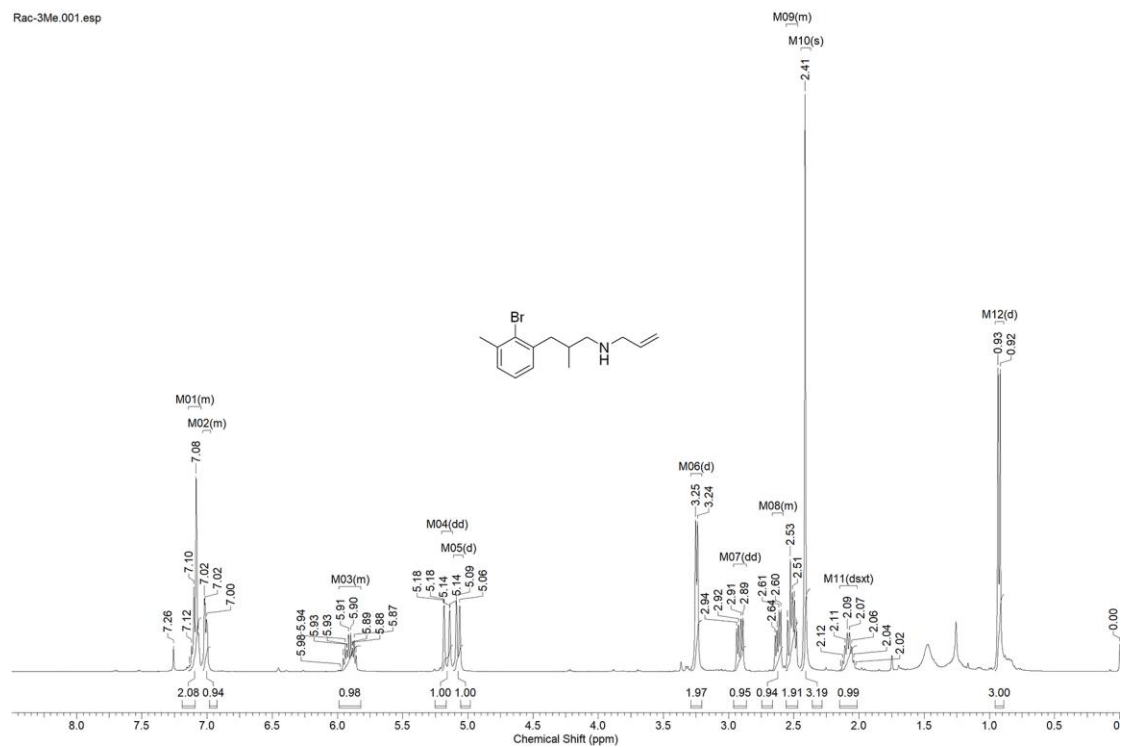

Rac-3Me.002.esp

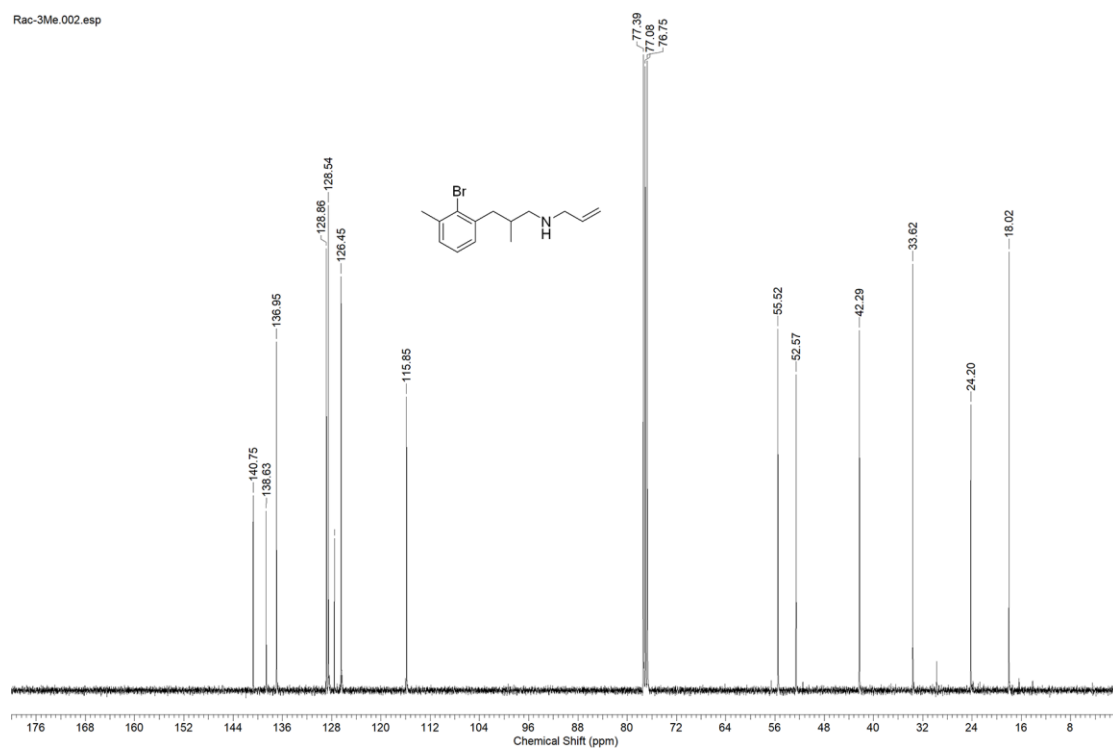

<sup>1</sup>H-NMR spectra and <sup>13</sup>C-NMR spectra of

*N*-(3-(2-bromo-3-methylphenyl)-2-methylpropyl)prop-2-en-1-amine (Rac-4g)

4me.001.esp

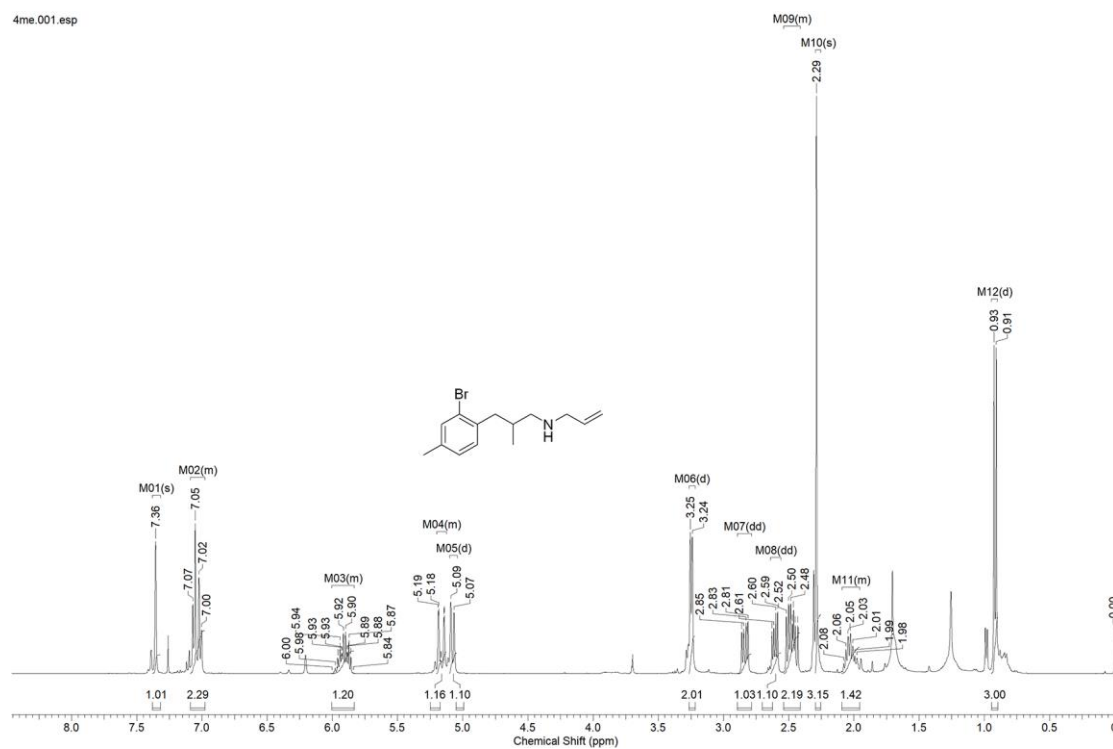

4me.002.esp

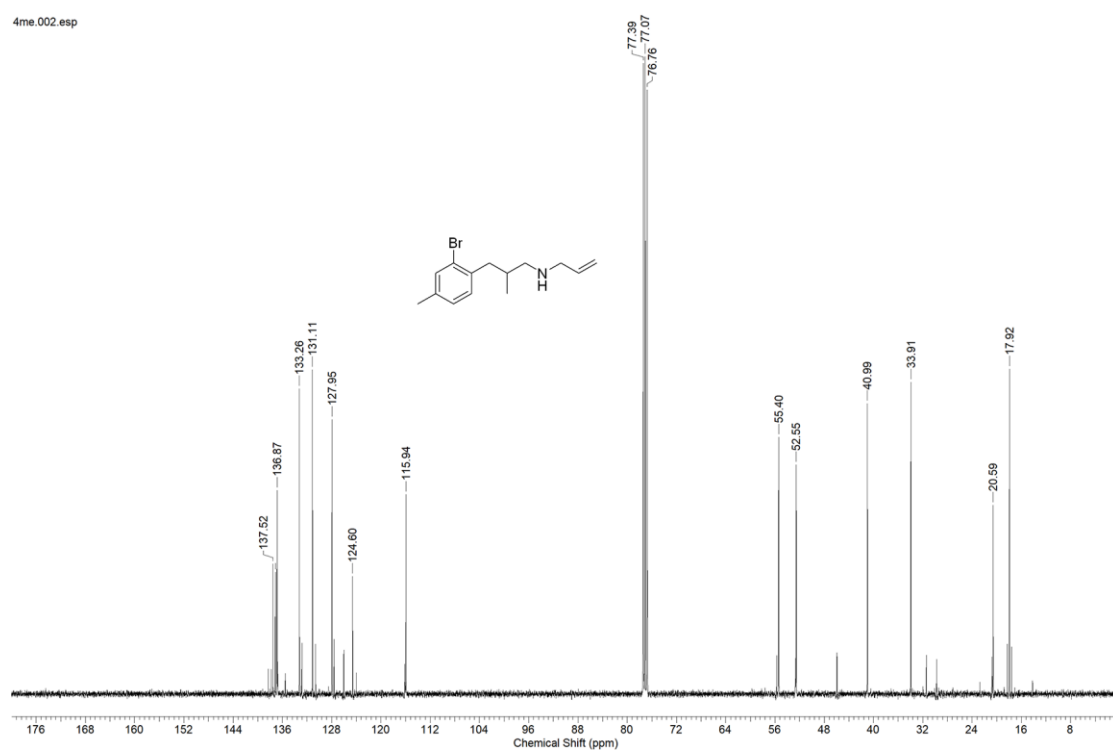

<sup>1</sup>H-NMR spectra and <sup>13</sup>C-NMR spectra of

*N*-(3-(2-bromo-4-methylphenyl)-2-methylpropyl)prop-2-en-1-amine (**Rac-4h**)

Rac-S.001.esp

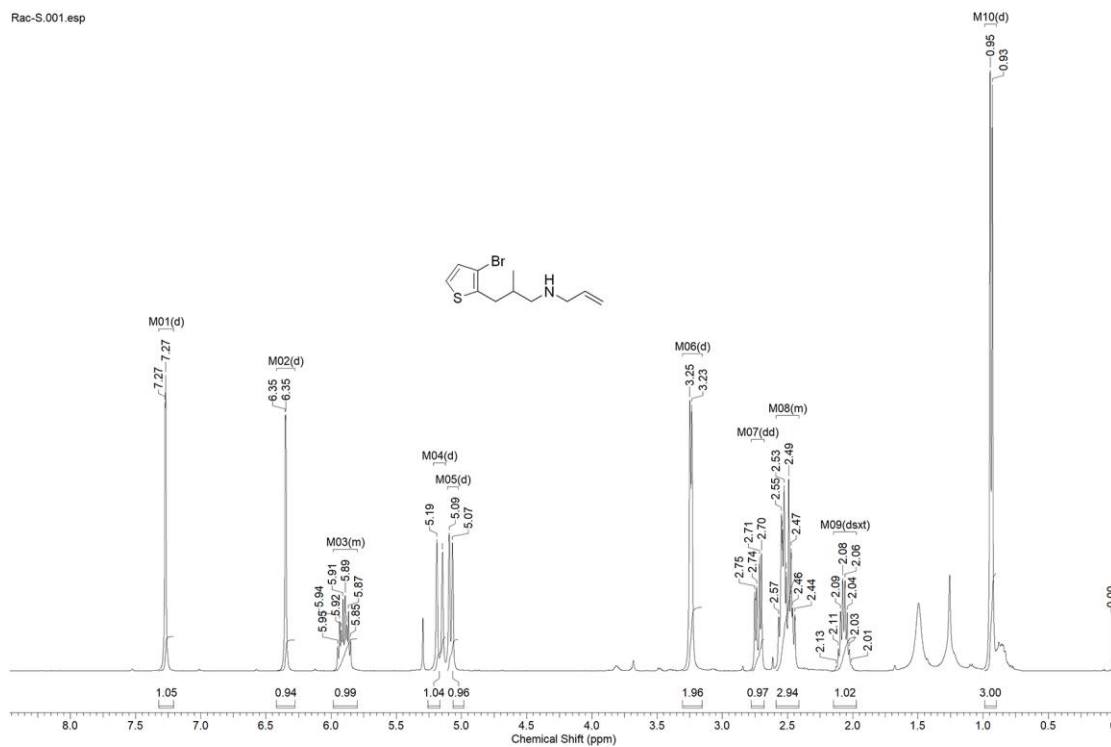

Rac-S.002.esp

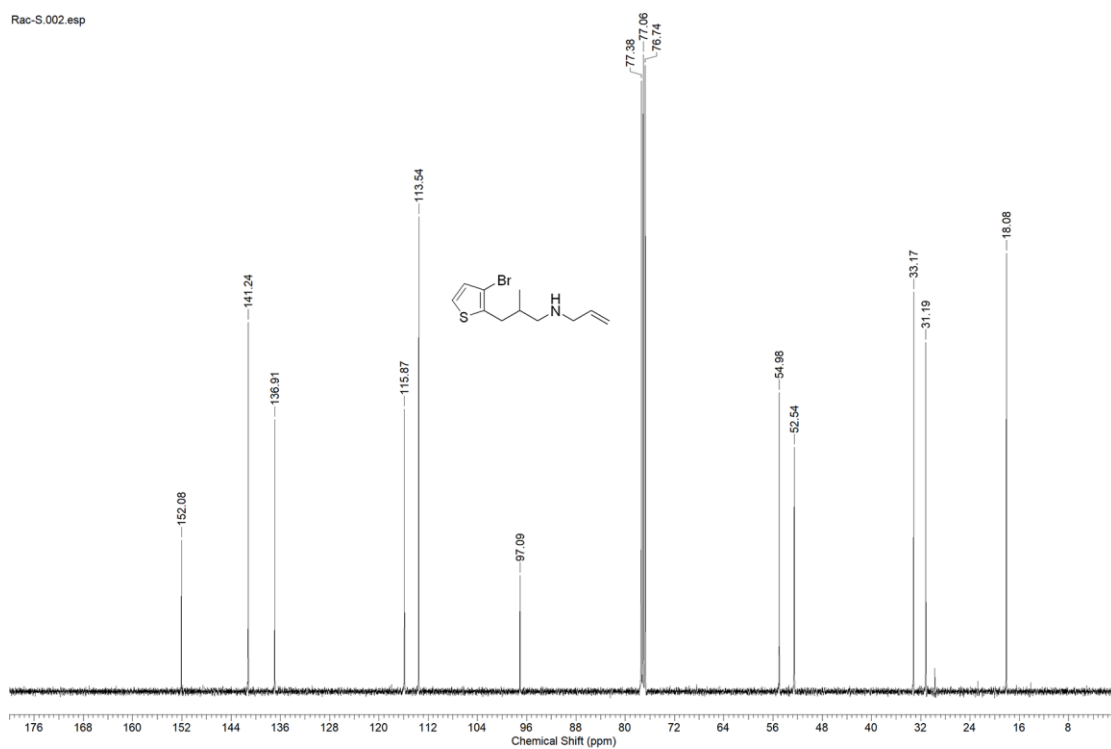

<sup>1</sup>H-NMR spectra and <sup>13</sup>C-NMR spectra of

*N*-(3-(3-bromothiophen-2-yl)-2-methylpropyl)prop-2-en-1-amine (Rac-4i)

Rac-O.001.esp

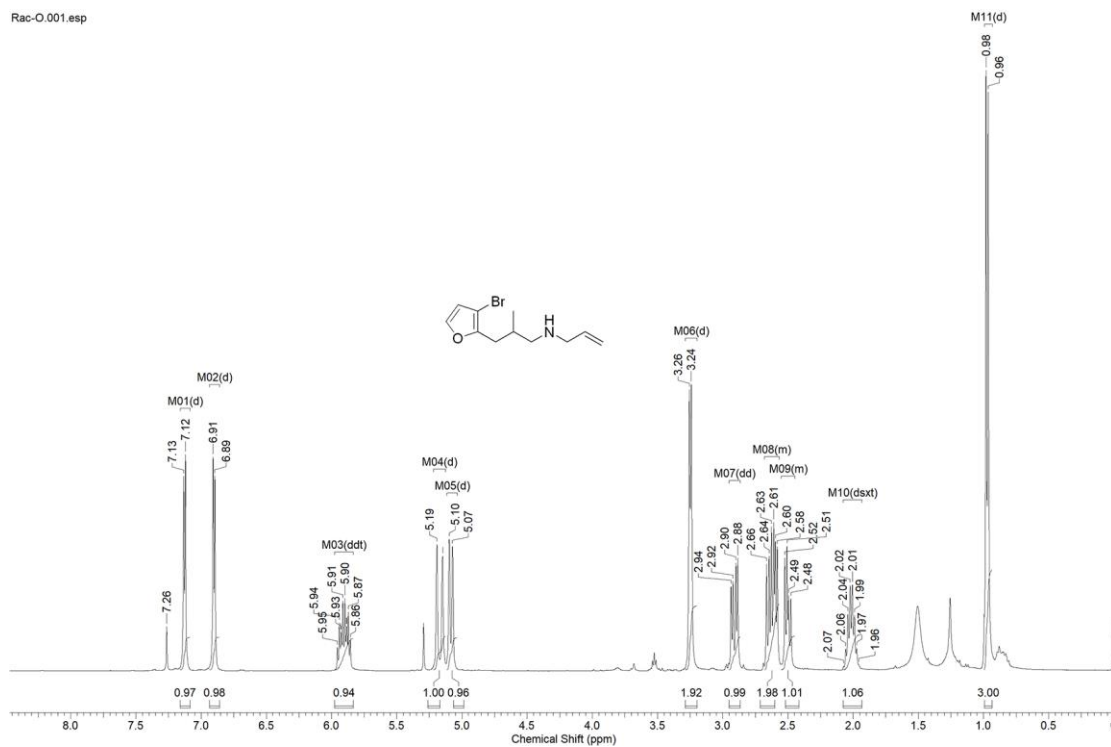

Rac-O.002.esp

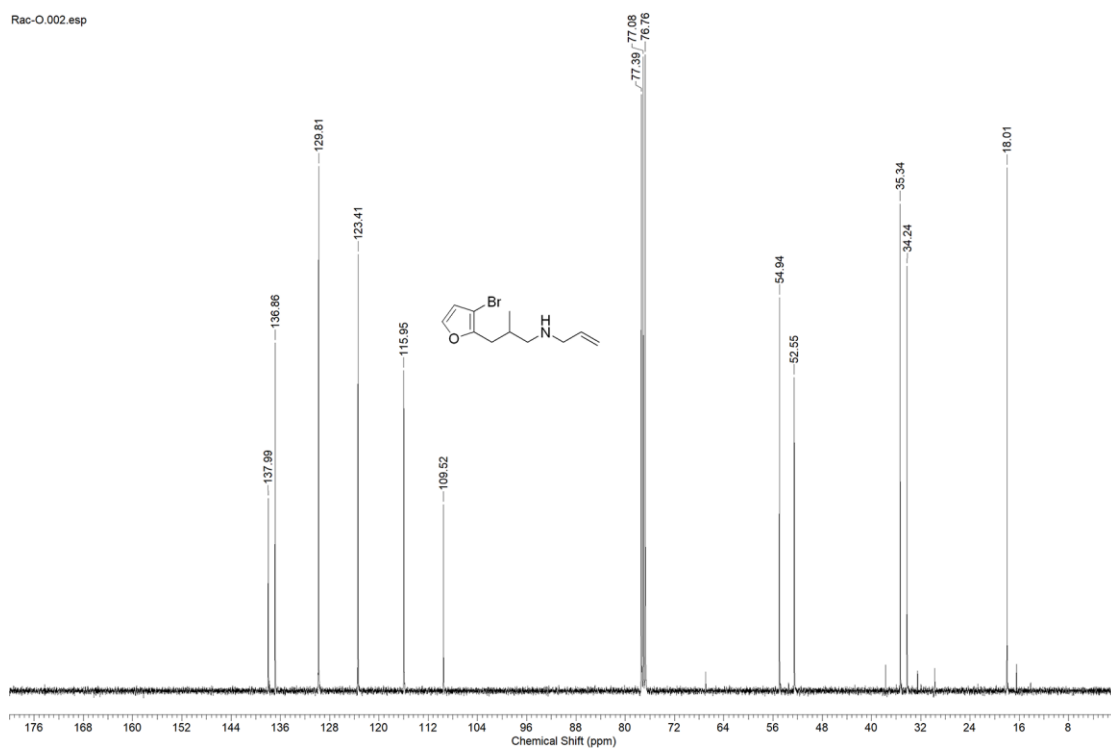

<sup>1</sup>H-NMR spectra and <sup>13</sup>C-NMR spectra of

*N*-(3-(3-bromofuran-2-yl)-2-methylpropyl)prop-2-en-1-amine (Rac-4j)

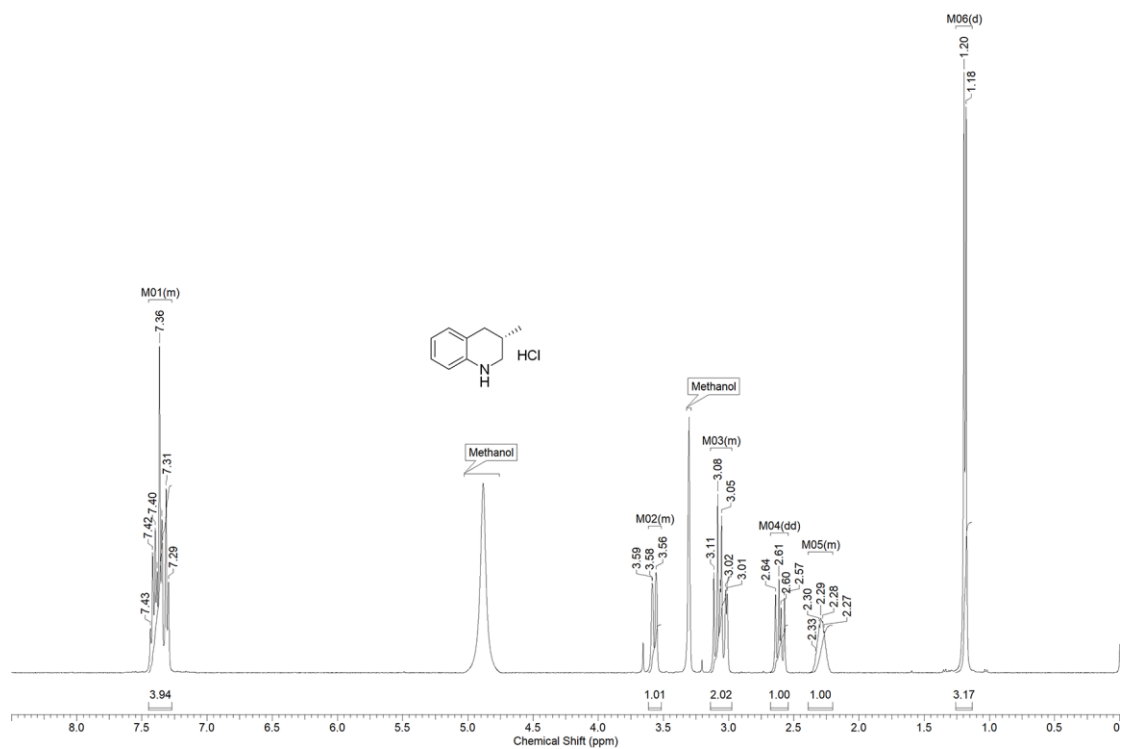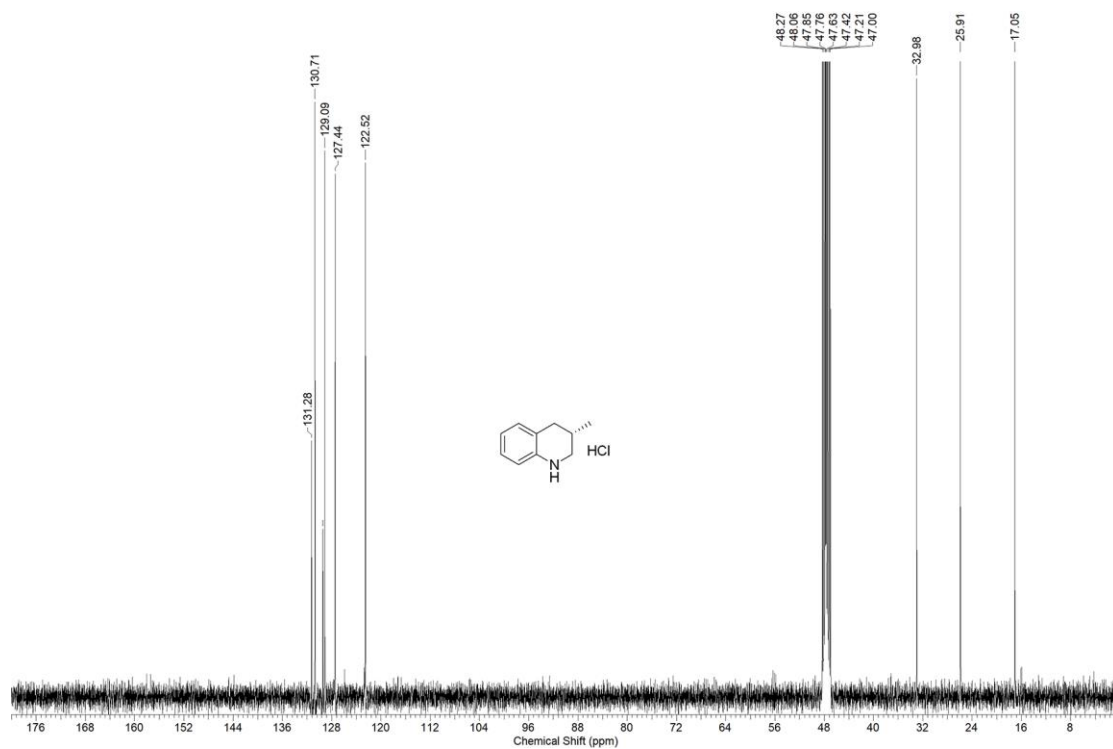

<sup>1</sup>H-NMR spectra and <sup>13</sup>C-NMR spectra of

(S)-3-methyl-1,2,3,4-tetrahydroquinoline hydrochloride ((S)-6a)

S-3F-HCl.001.esp

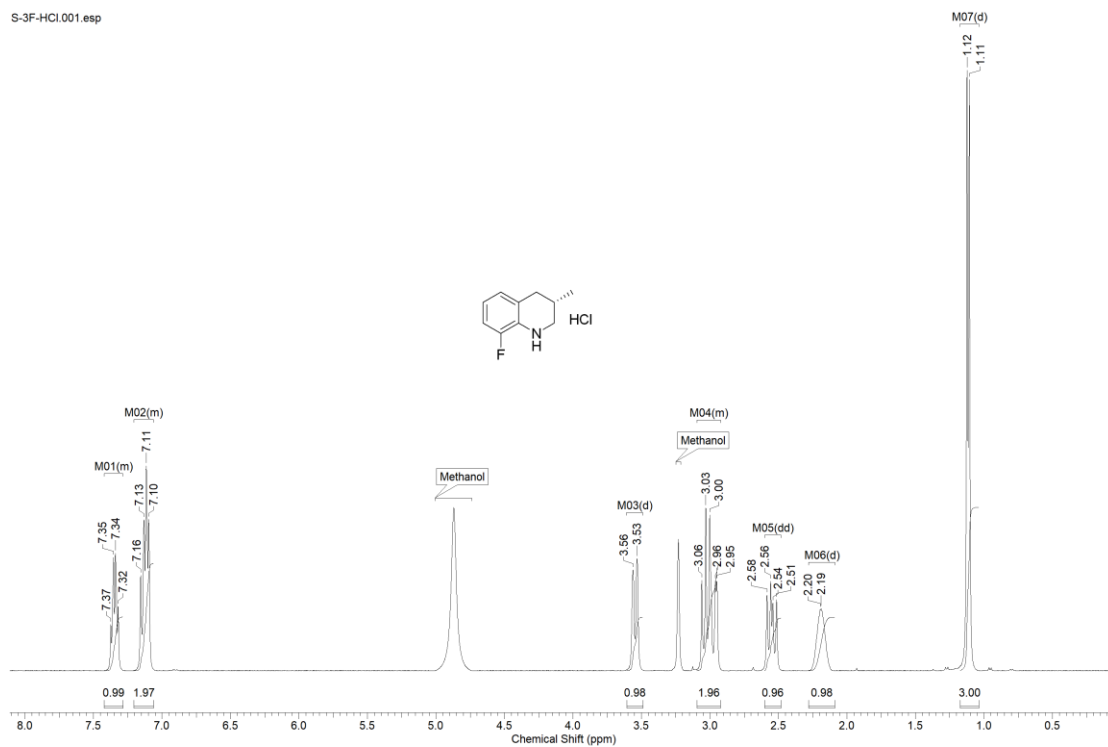

S-3F-HCl.002.esp

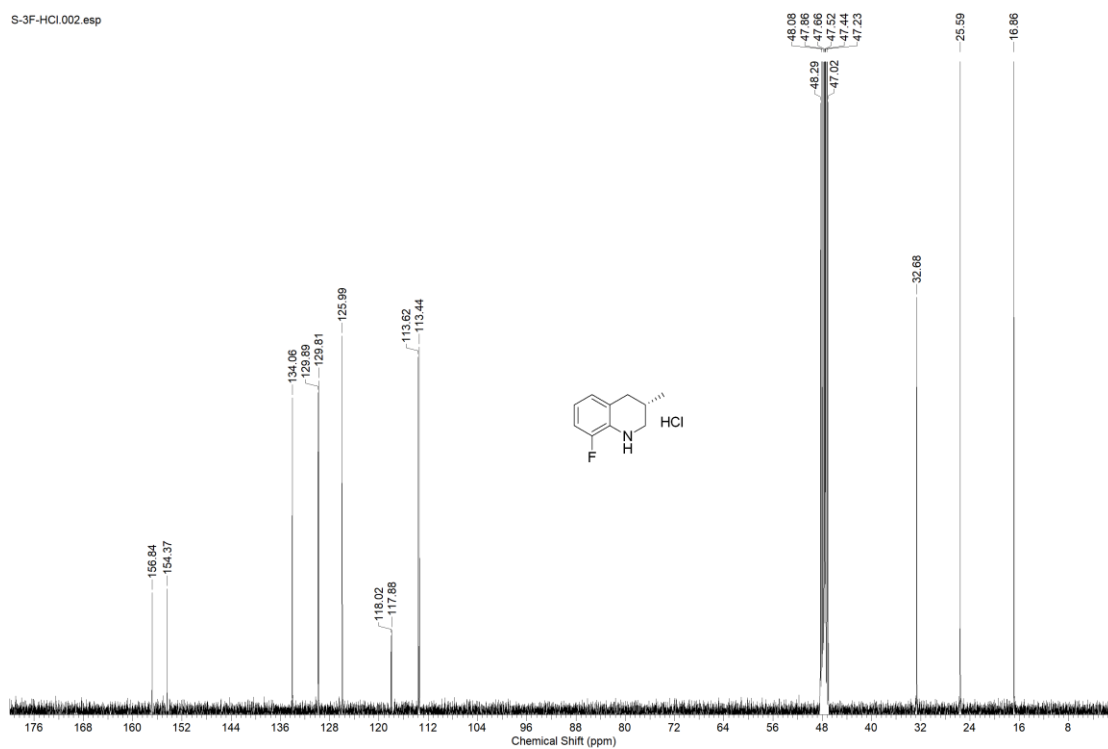

<sup>1</sup>H-NMR spectra and <sup>13</sup>C-NMR spectra of

(S)-8-fluoro-3-methyl-1,2,3,4-tetrahydroquinoline hydrochloride ((S)-6c)

4F-HCl.001.esp

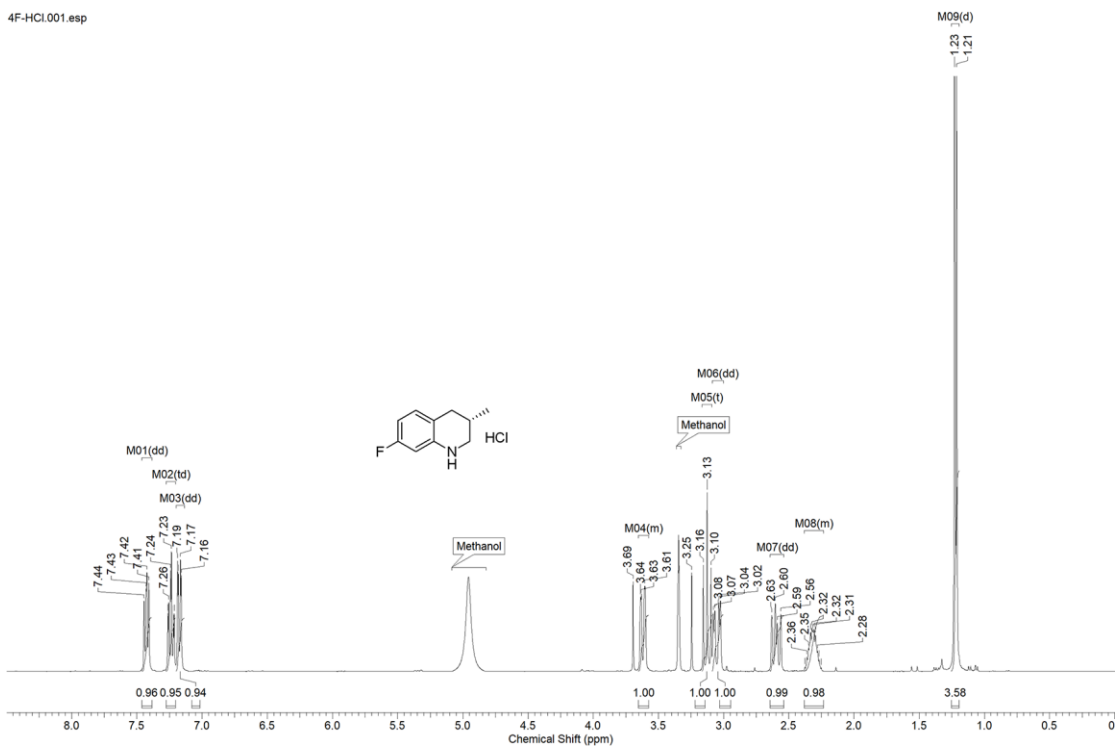

4F-HCl.002.esp

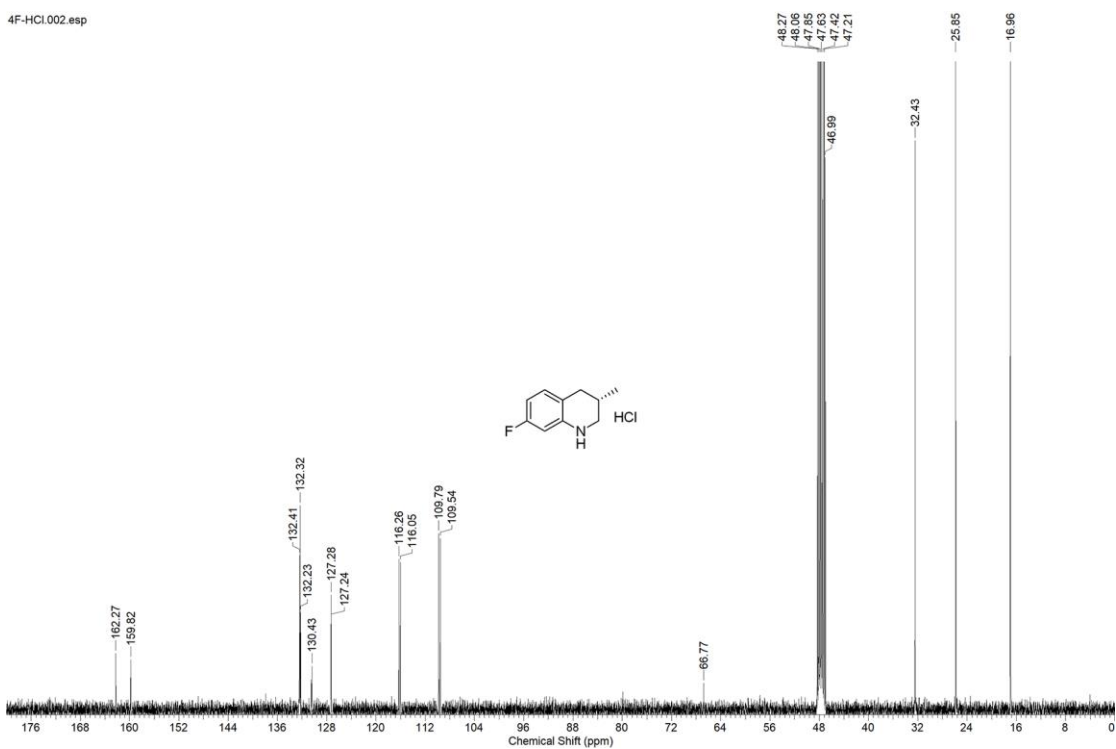

<sup>1</sup>H-NMR spectra and <sup>13</sup>C-NMR spectra of

(S)-7-fluoro-3-methyl-1,2,3,4-tetrahydroquinoline hydrochloride ((S)-6d)

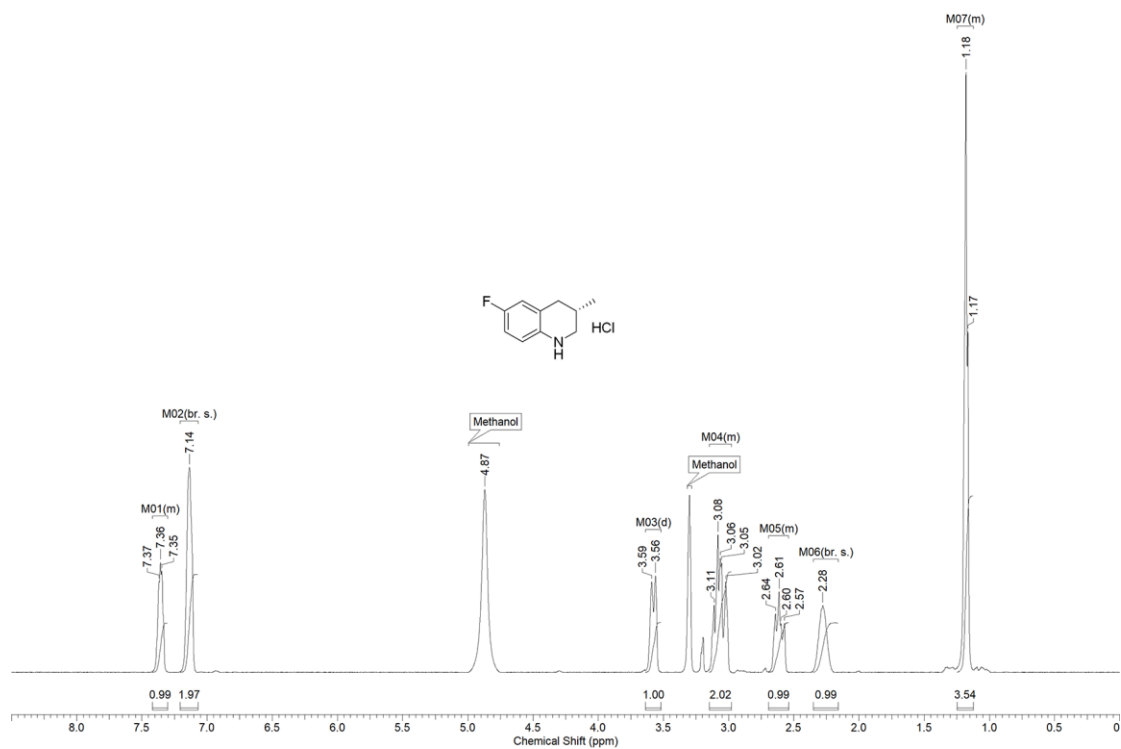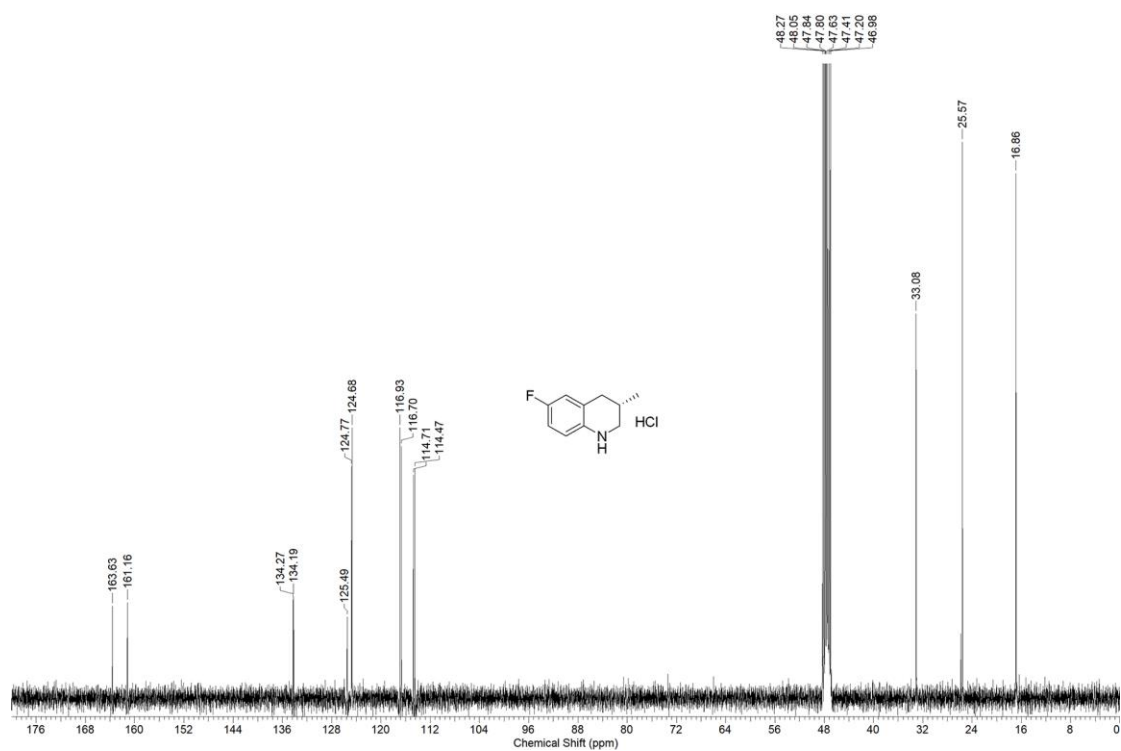

<sup>1</sup>H-NMR spectra and <sup>13</sup>C-NMR spectra of

(S)-6-fluoro-3-methyl-1,2,3,4-tetrahydroquinoline hydrochloride ((S)-6e)



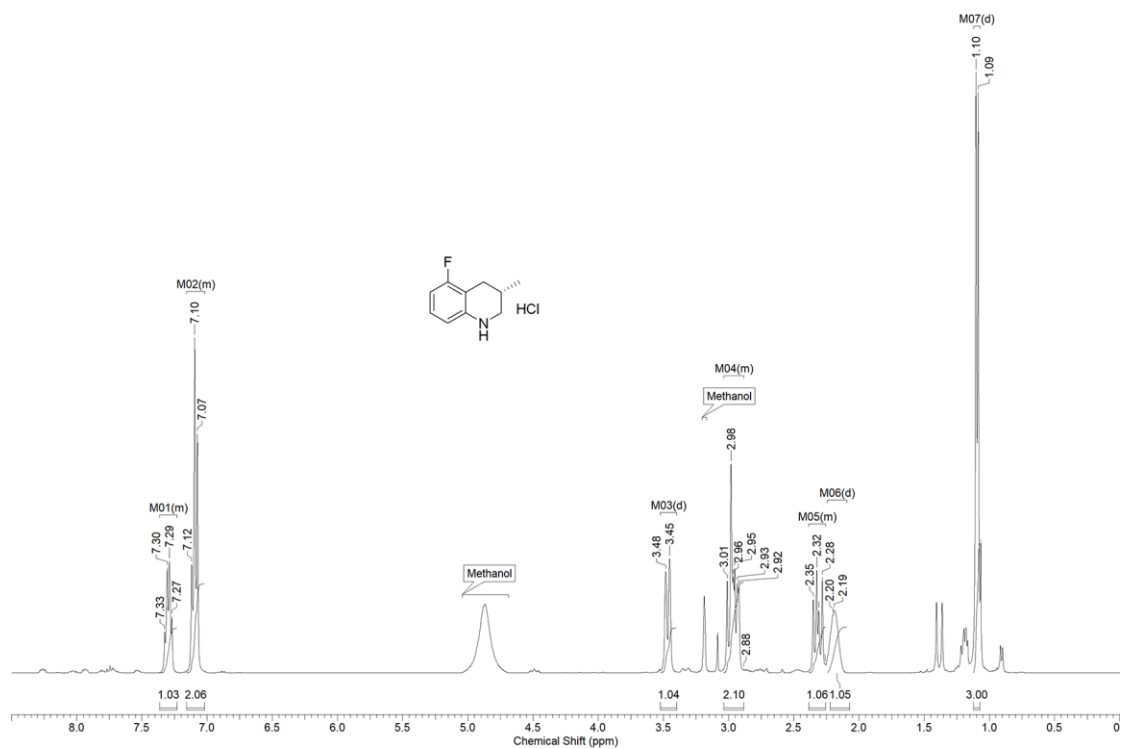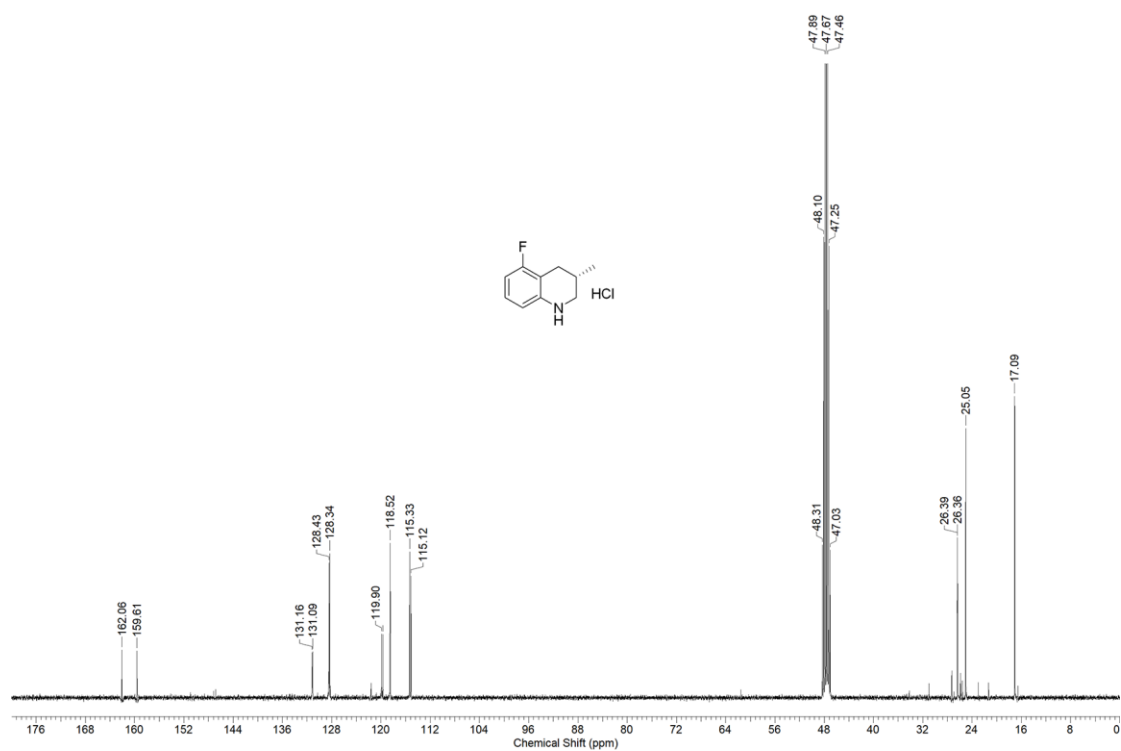

<sup>1</sup>H-NMR spectra and <sup>13</sup>C-NMR spectra of

(S)-5-fluoro-3-methyl-1,2,3,4-tetrahydroquinoline hydrochloride ((S)-6f)

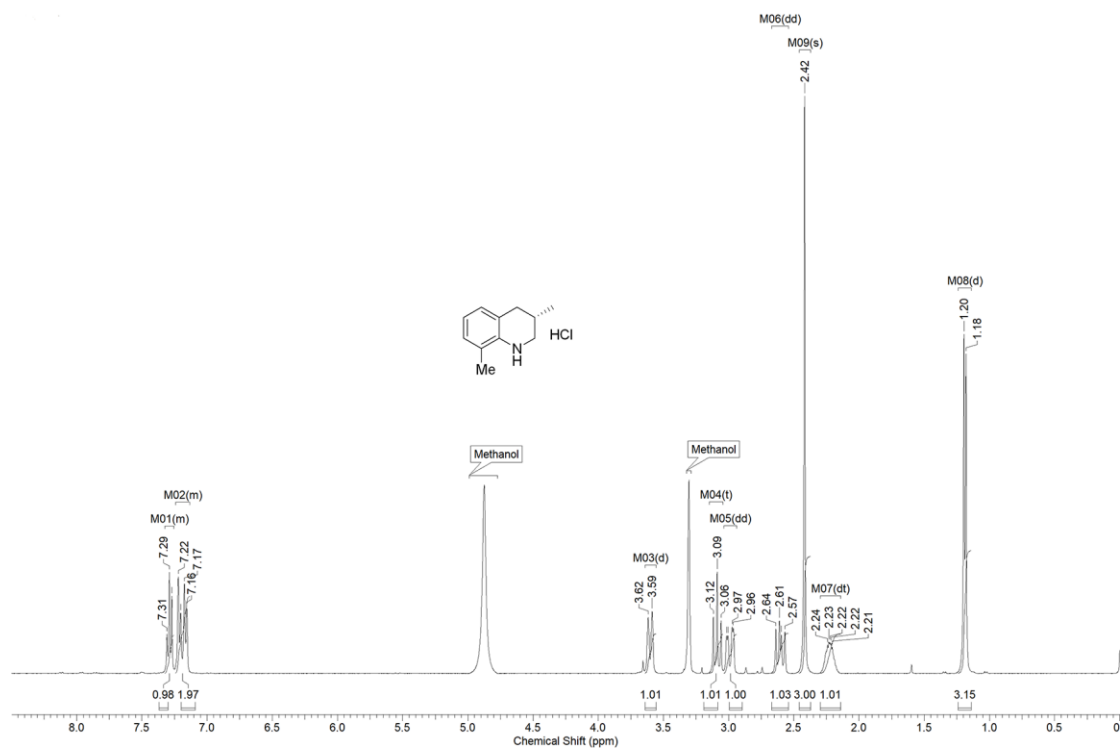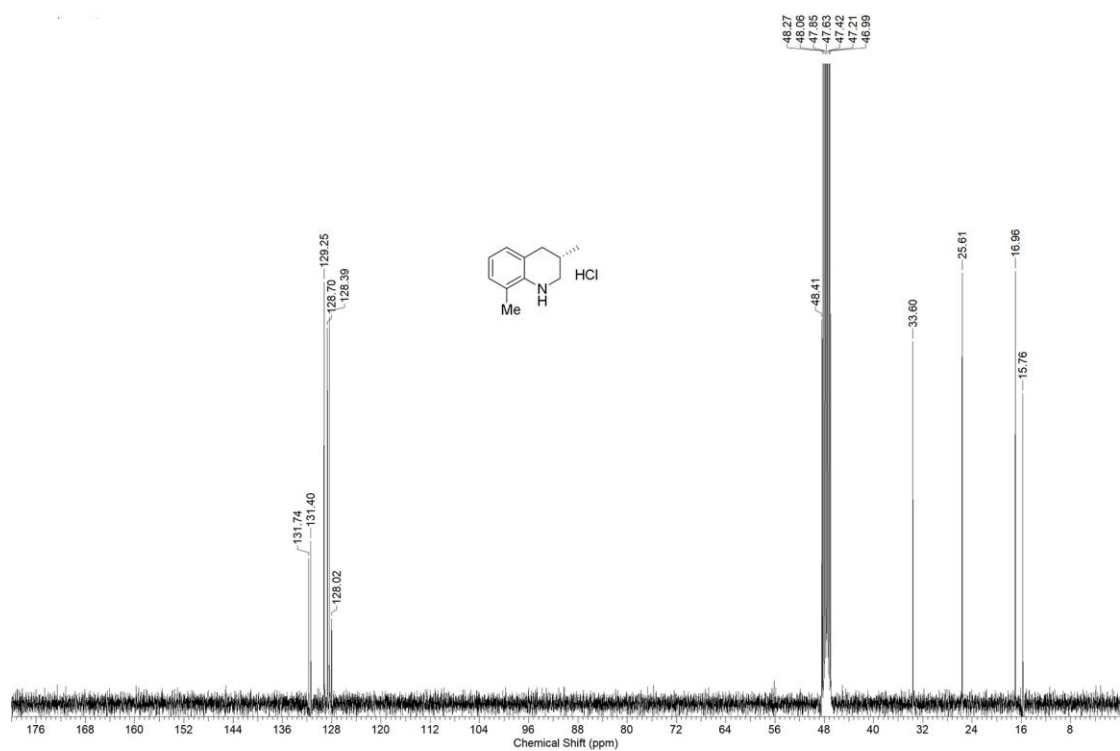

<sup>1</sup>H-NMR spectra and <sup>13</sup>C-NMR spectra of

(S)- 3,8-dimethyl-1,2,3,4-tetrahydroquinoline hydrochloride ((S)-6g)

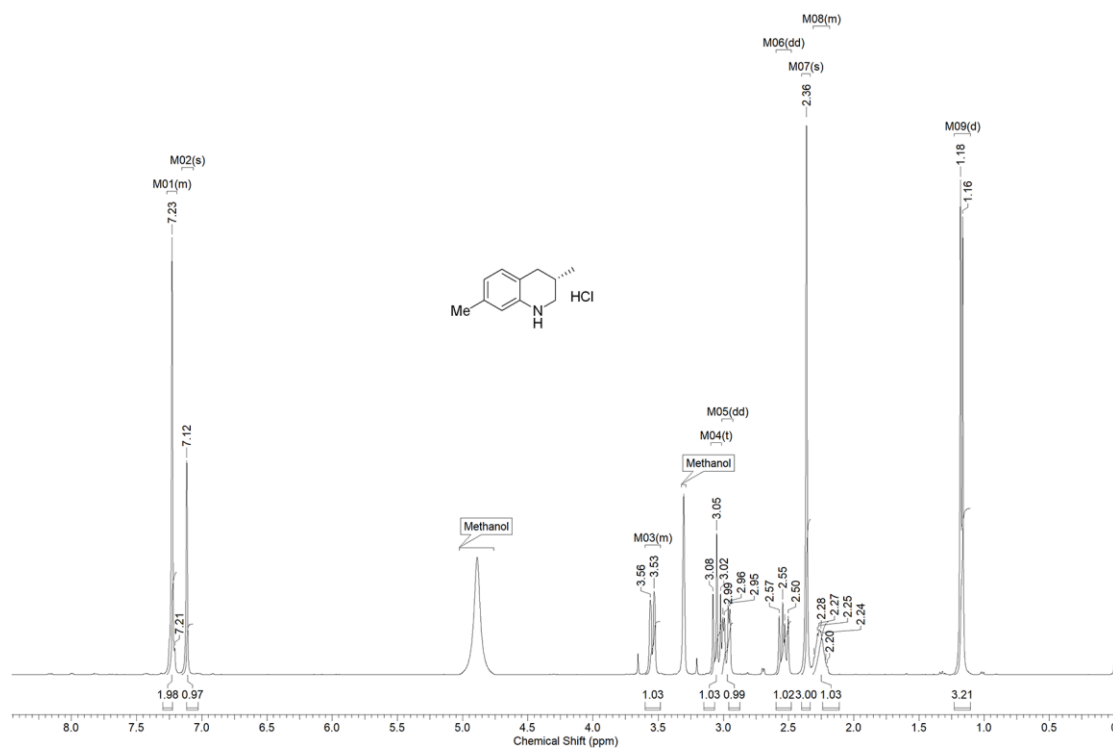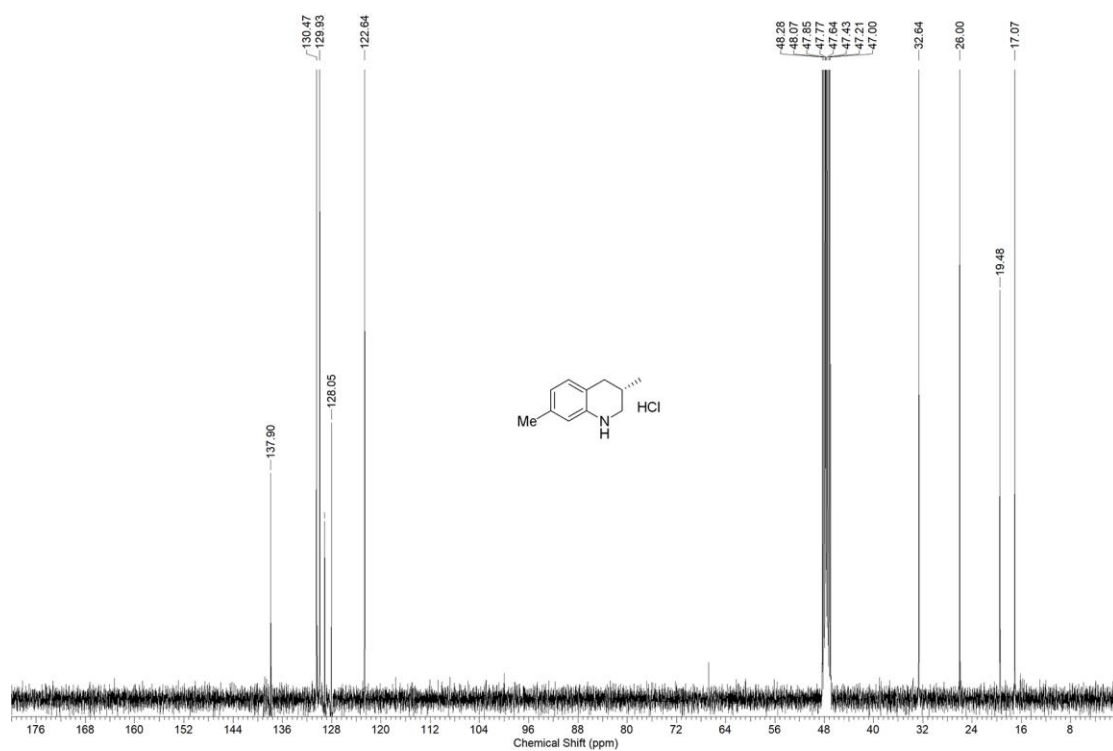

<sup>1</sup>H-NMR spectra and <sup>13</sup>C-NMR spectra of

(S)-3,7-dimethyl-1,2,3,4-tetrahydroquinoline hydrochloride ((S)-6h)

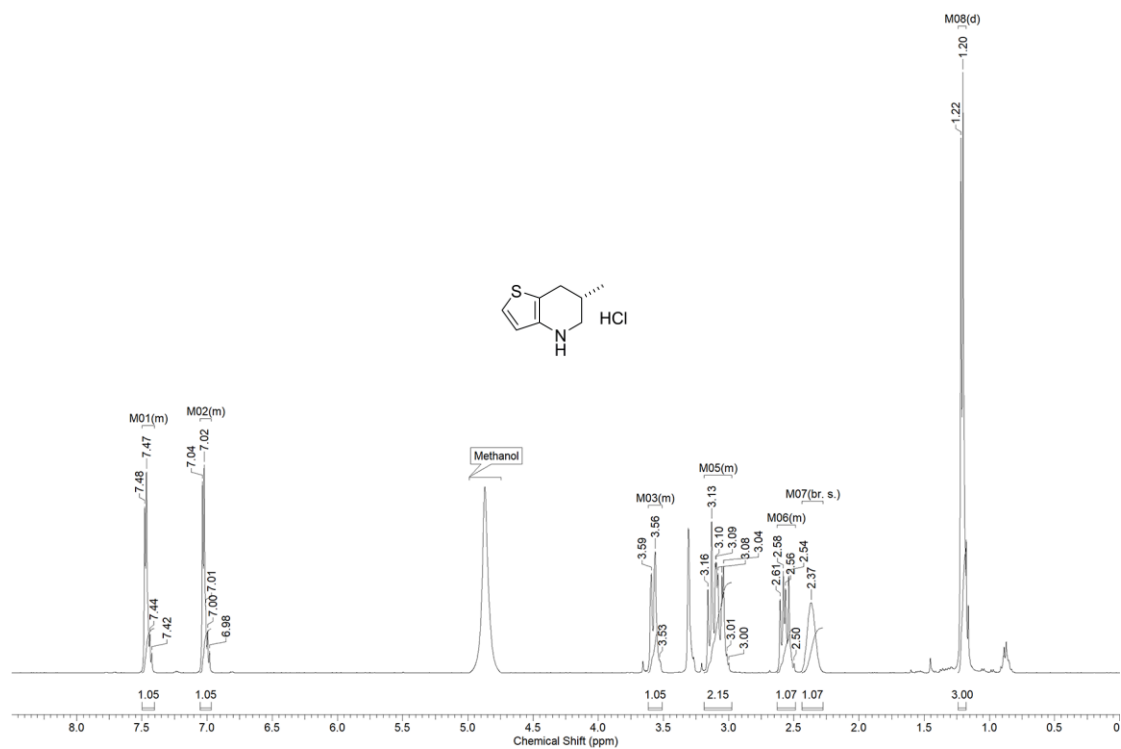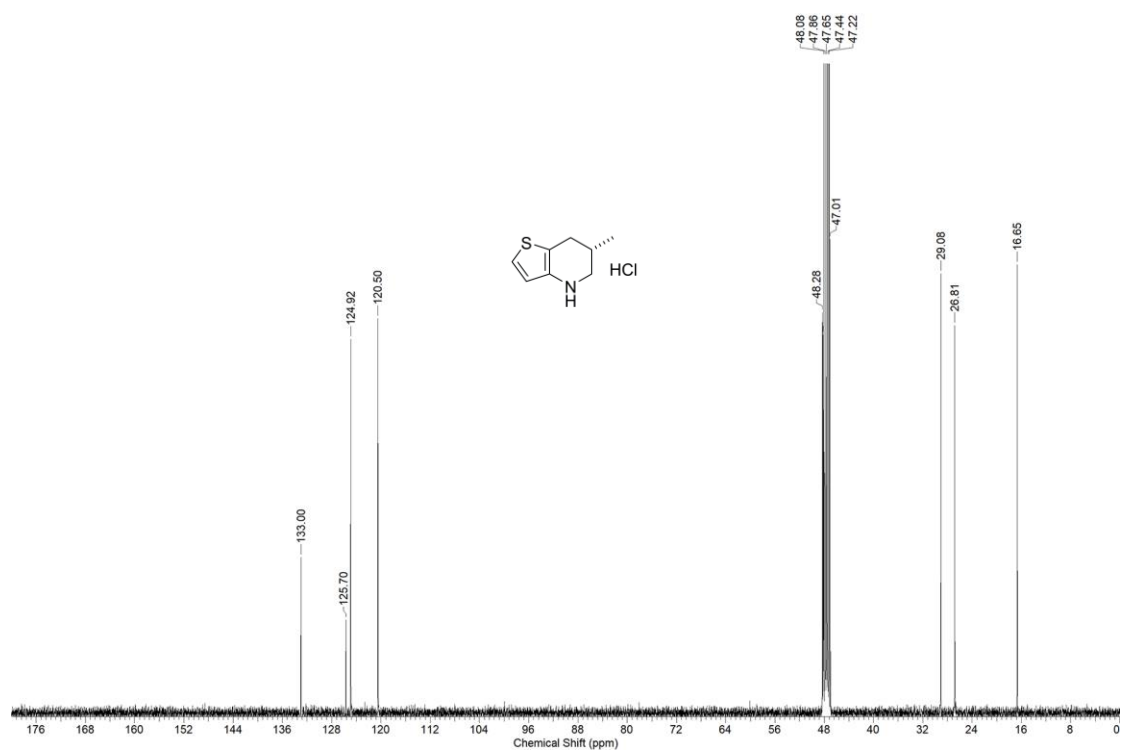

<sup>1</sup>H-NMR spectra and <sup>13</sup>C-NMR spectra of

(S)-6-methyl-4,5,6,7-tetrahydrothieno[3,2-b]pyridine hydrochloride ((S)-6i)

Rac-3F-HCl.001.esp

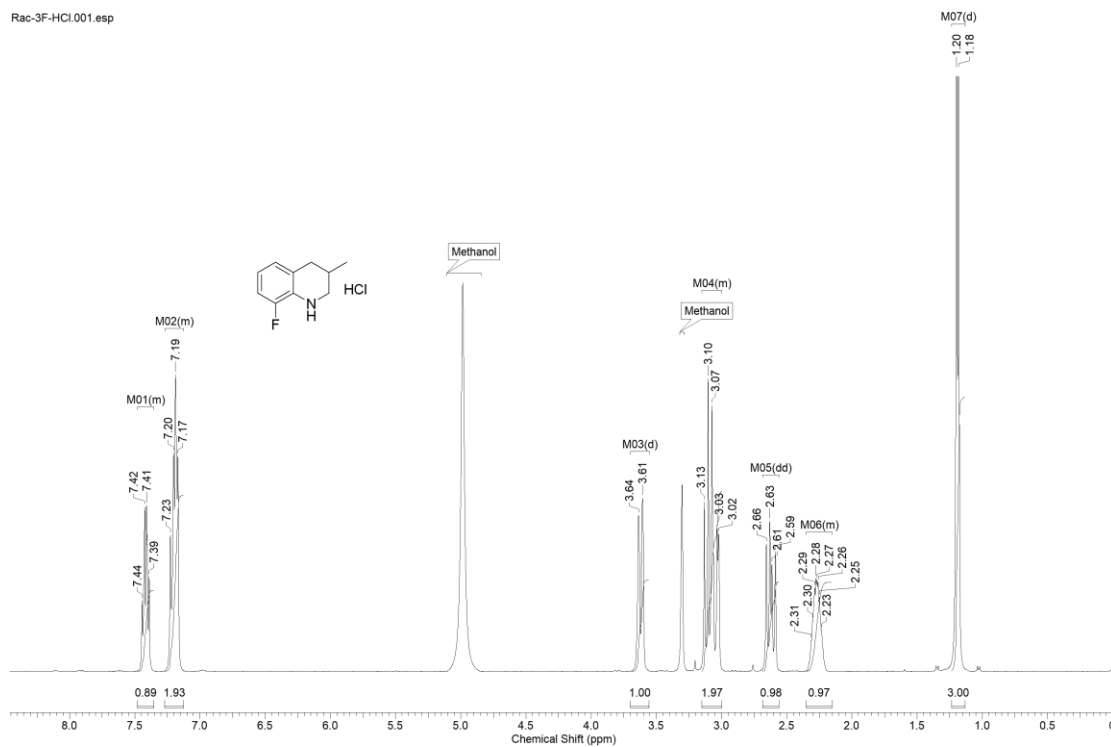

Rac-3F-HCl.002.esp

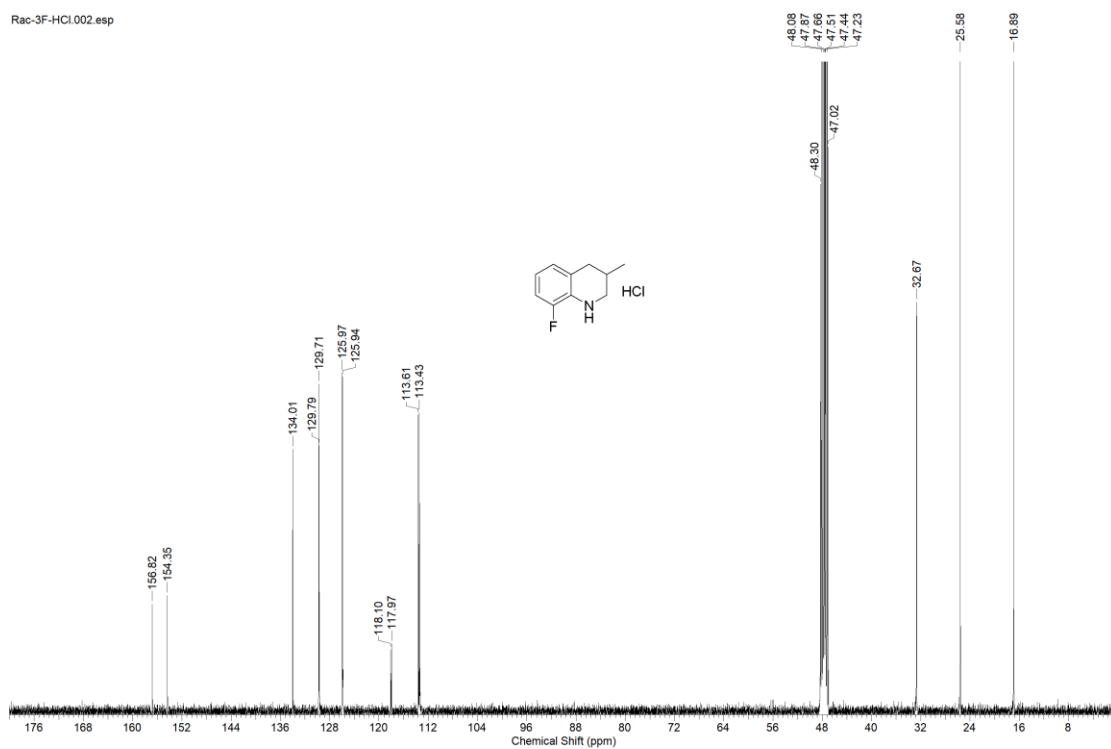

<sup>1</sup>H-NMR spectra and <sup>13</sup>C-NMR spectra of

8-fluoro-3-methyl-1,2,3,4-tetrahydroquinoline hydrochloride (Rac-6c)

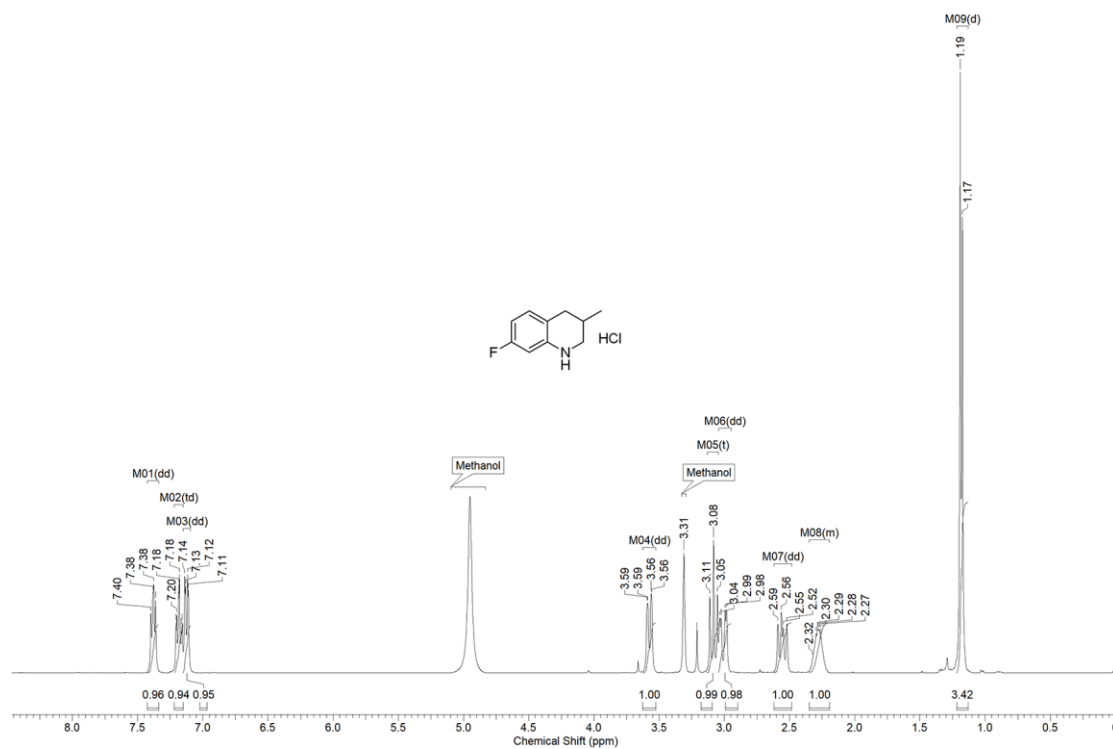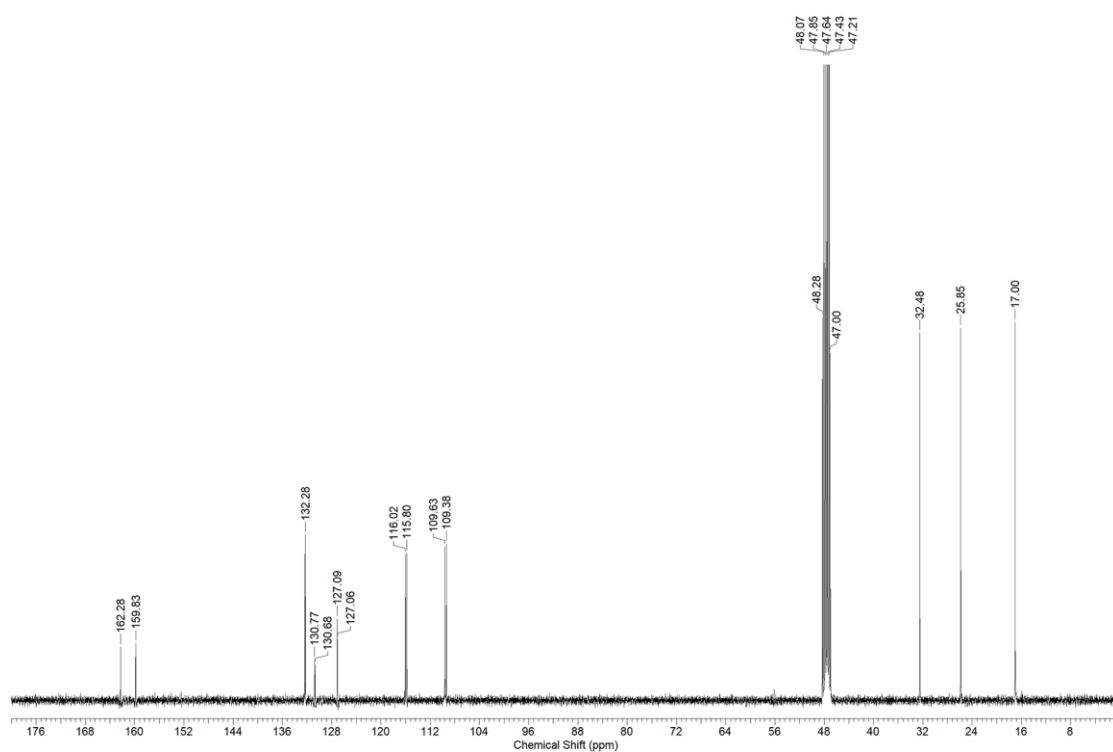

<sup>1</sup>H-NMR spectra and <sup>13</sup>C-NMR spectra of

7-fluoro-3-methyl-1,2,3,4-tetrahydroquinoline hydrochloride (Rac-6d)

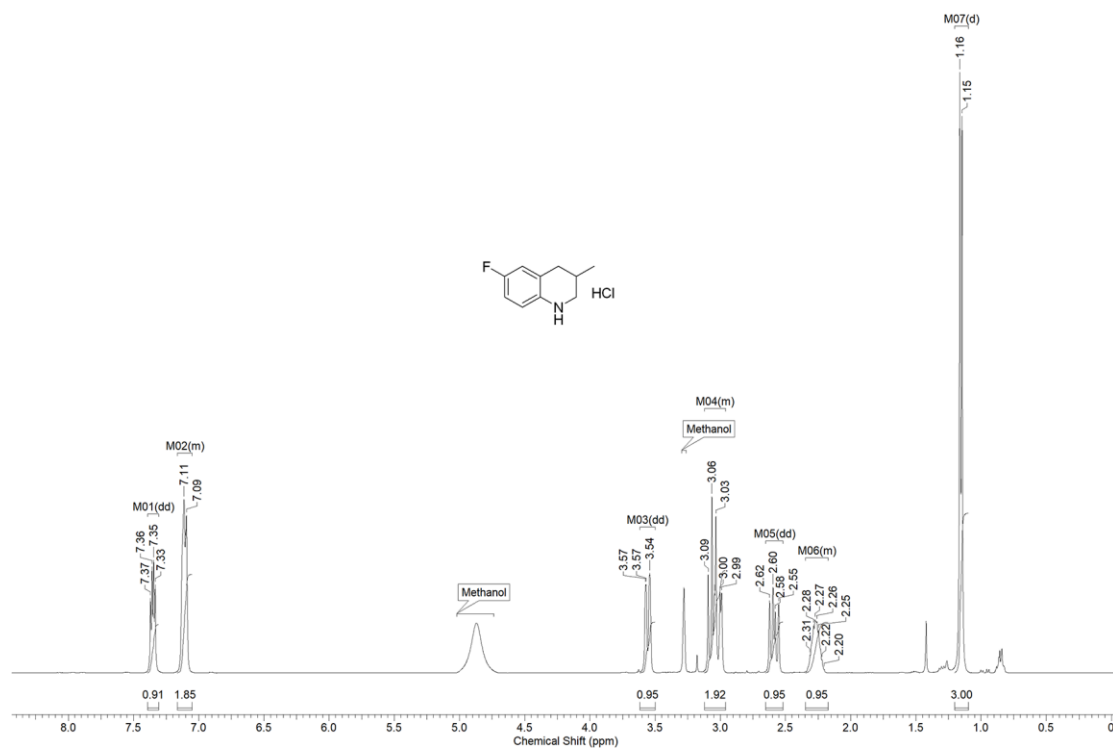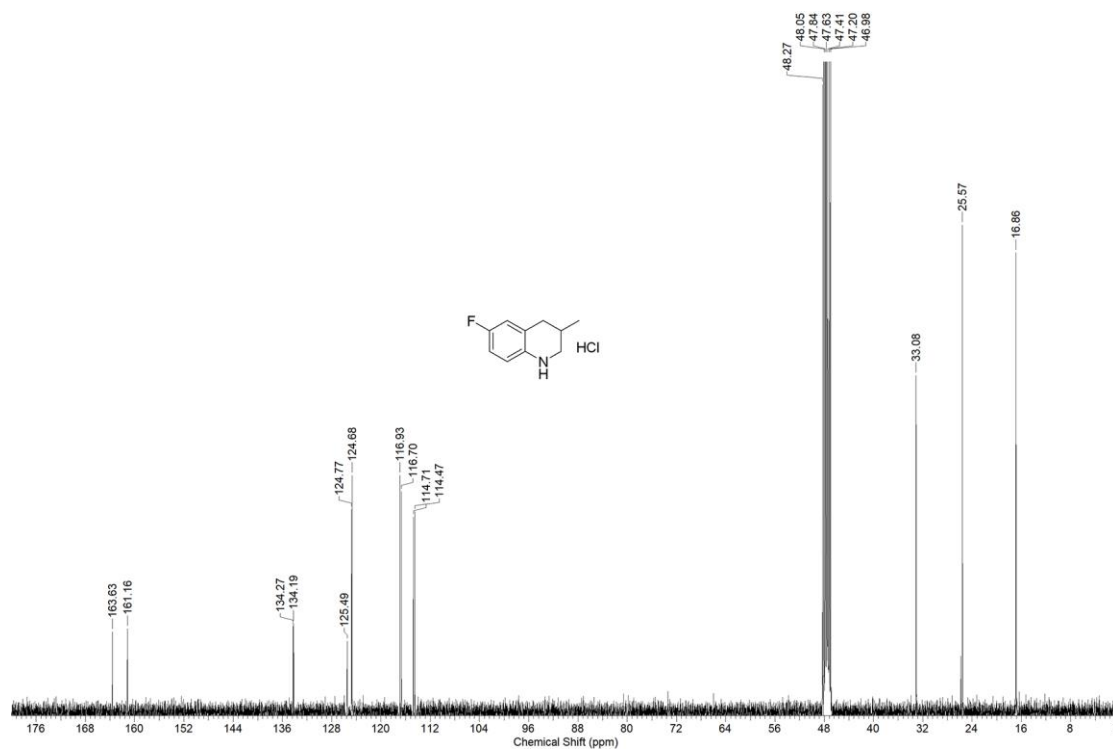

<sup>1</sup>H-NMR spectra and <sup>13</sup>C-NMR spectra of

6-fluoro-3-methyl-1,2,3,4-tetrahydroquinoline hydrochloride (Rac-6e)

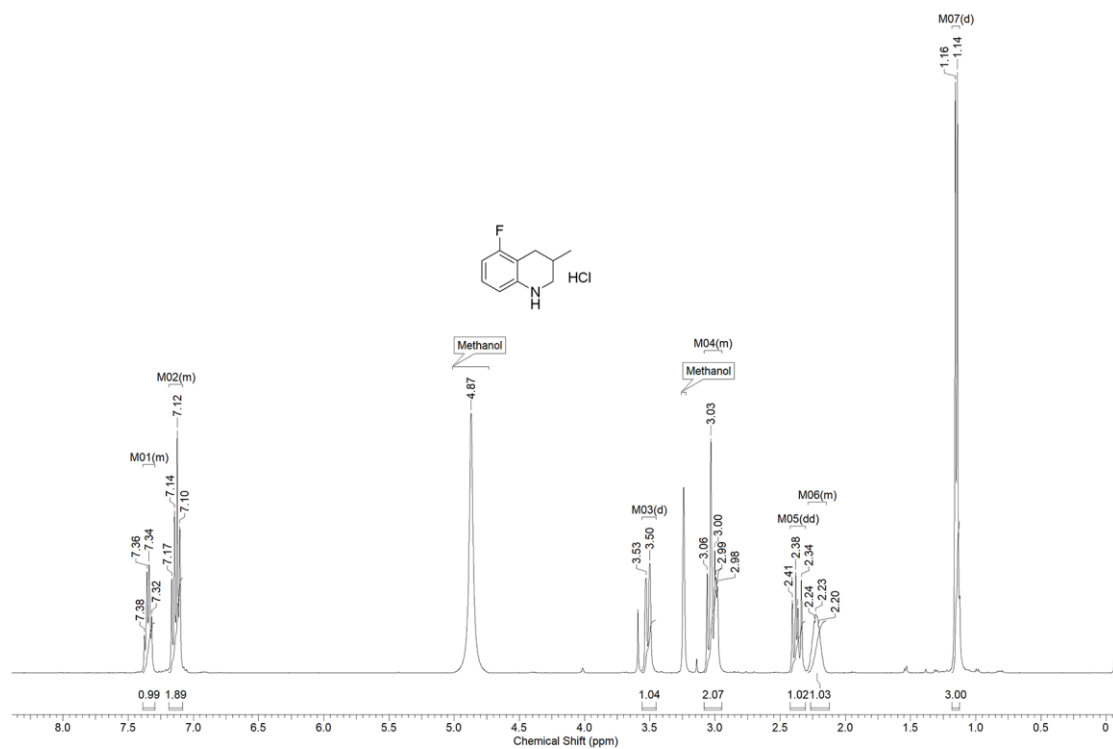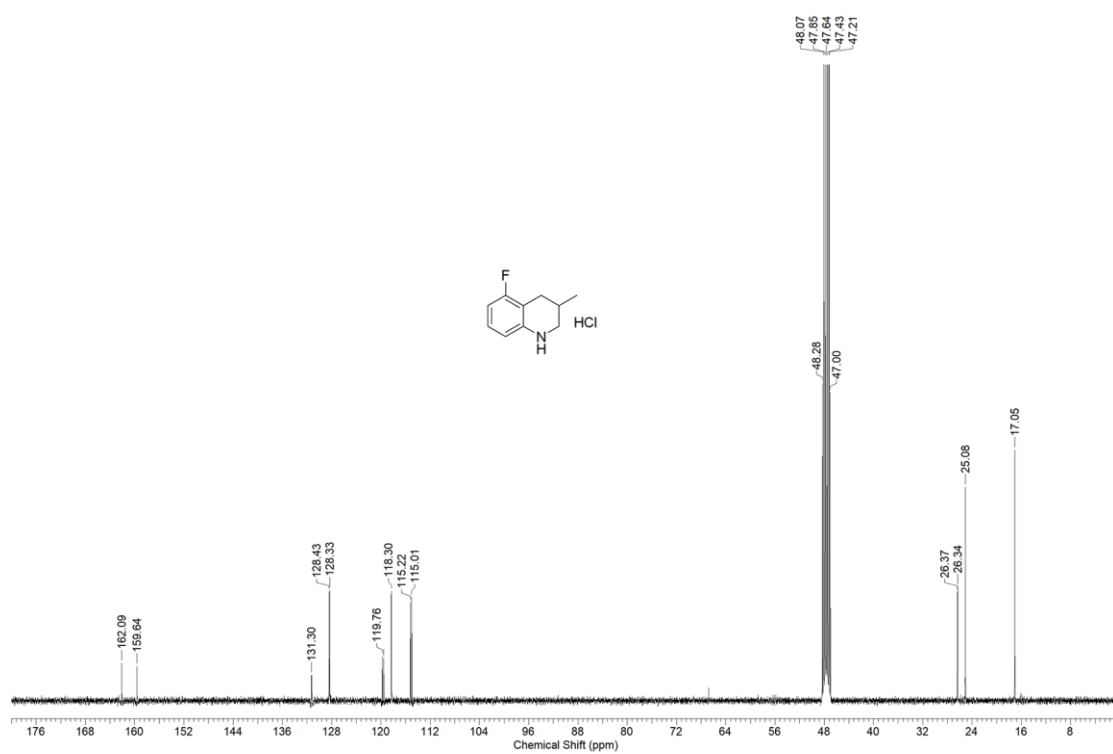

<sup>1</sup>H-NMR spectra and <sup>13</sup>C-NMR spectra of

5-fluoro-3-methyl-1,2,3,4-tetrahydroquinoline hydrochloride (Rac-6f)



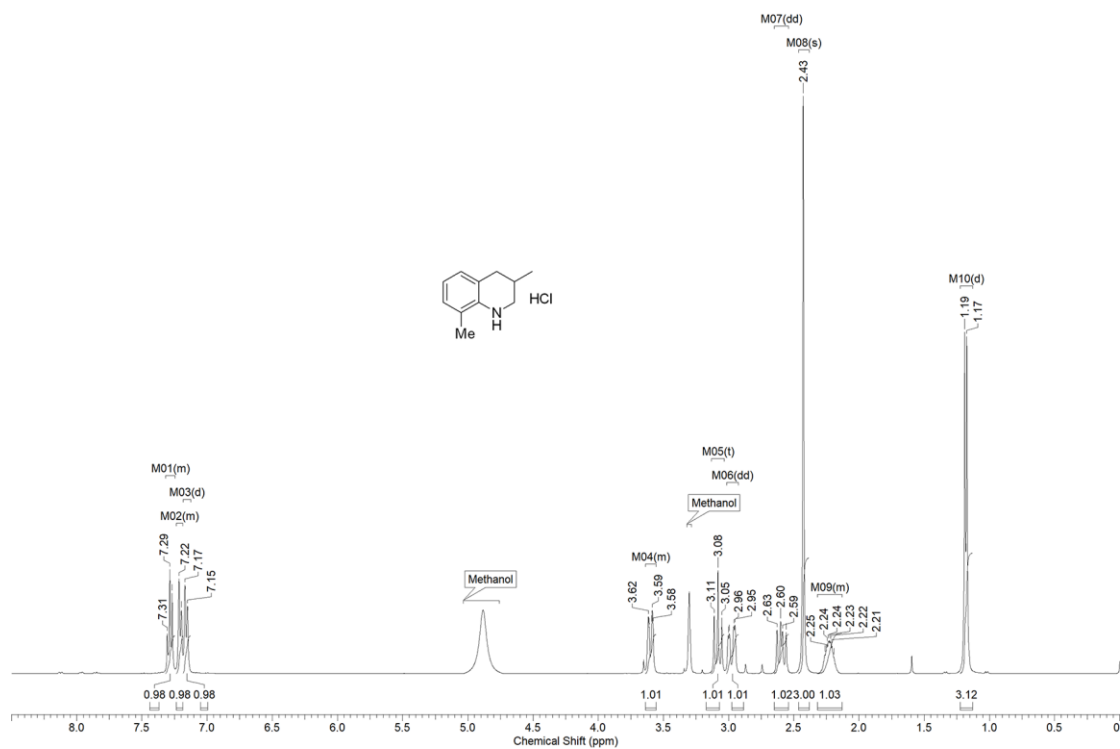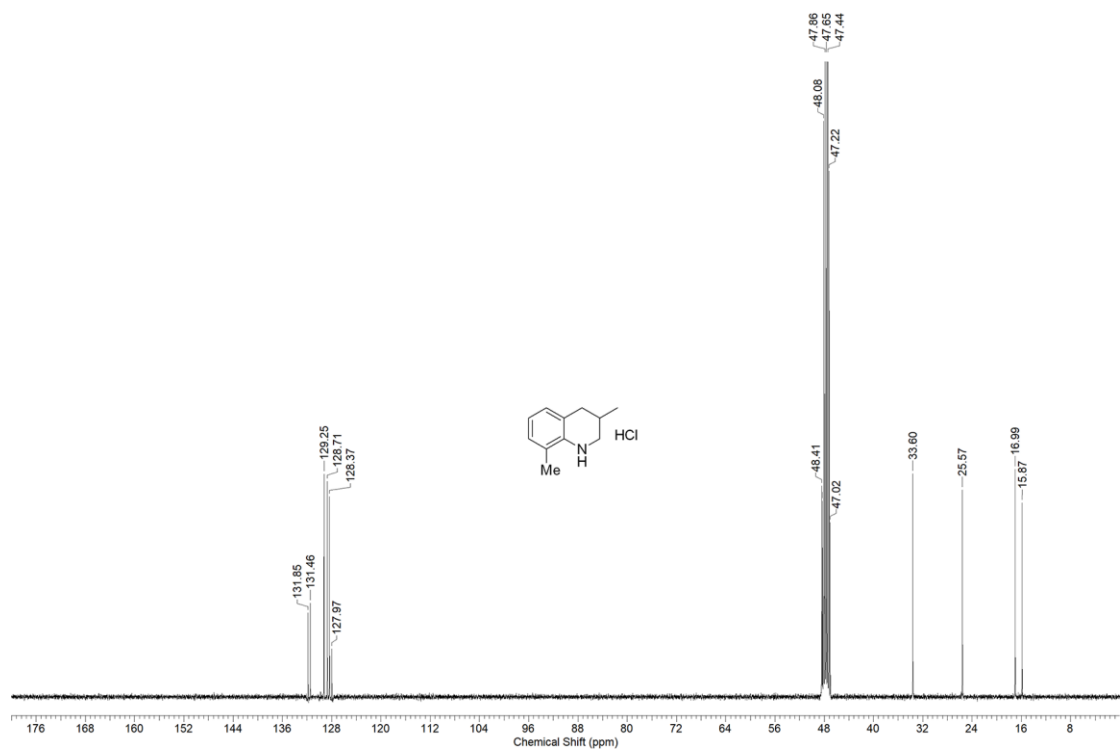

1H-NMR spectra and 13C-NMR spectra of  
3,8-dimethyl-1,2,3,4-tetrahydroquinoline hydrochloride (Rac-6g)

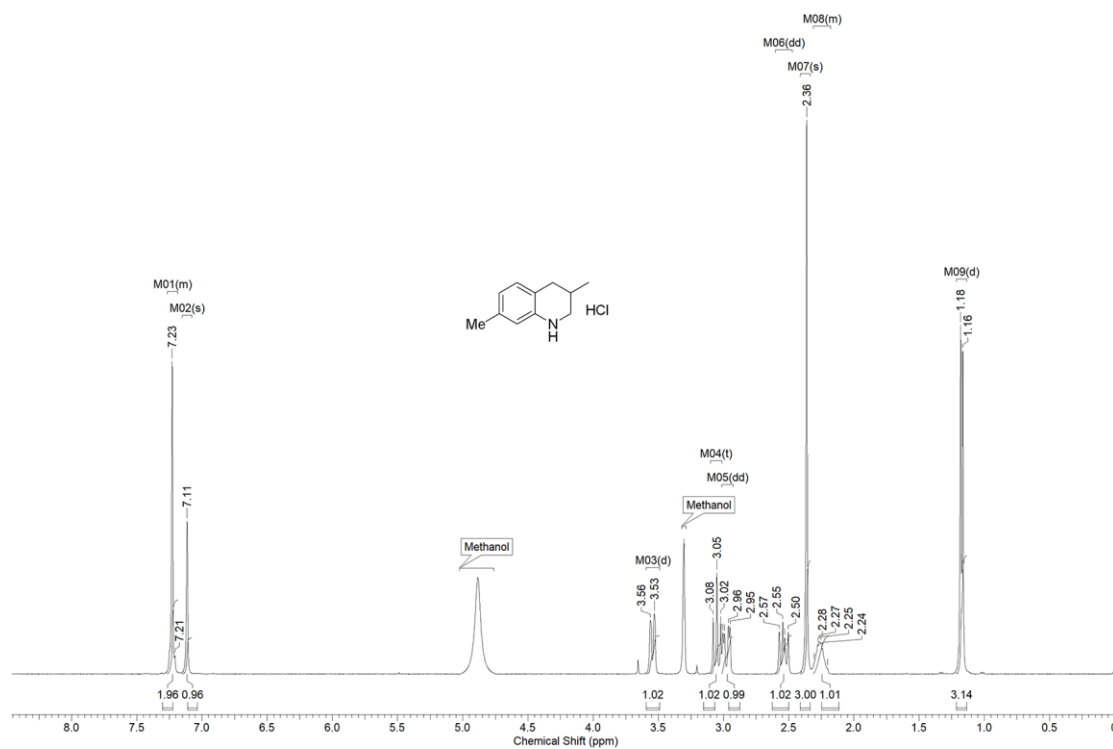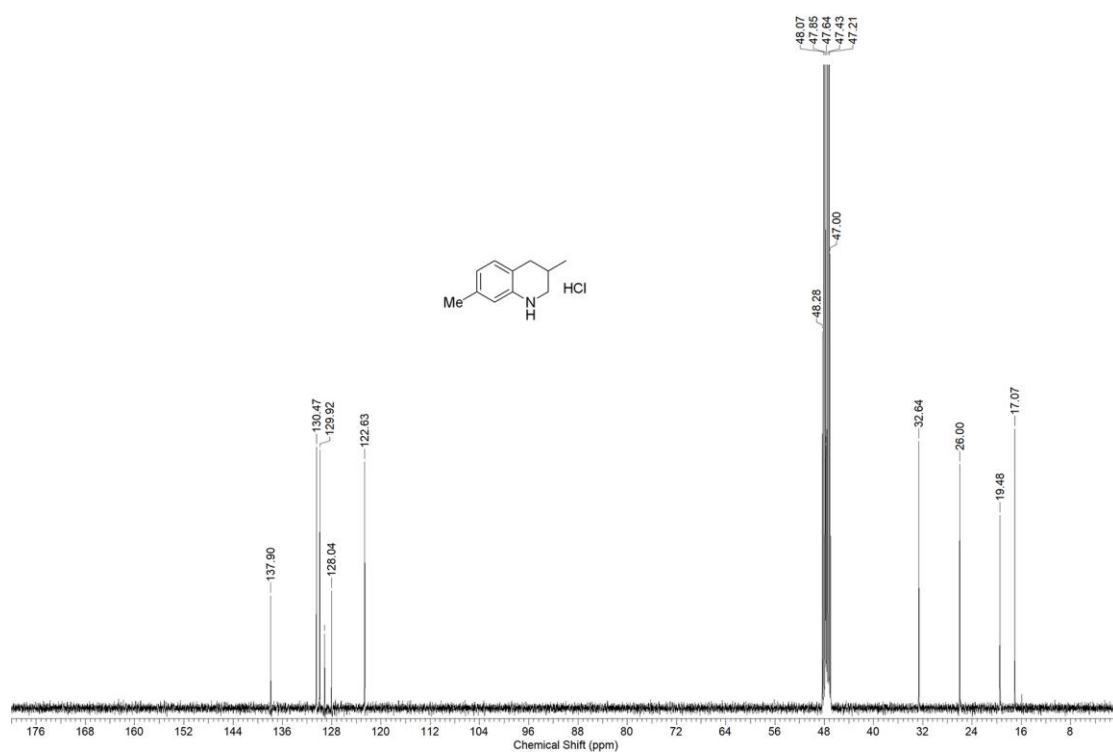

$^1\text{H}$ -NMR spectra and  $^{13}\text{C}$ -NMR spectra of

3,7-dimethyl-1,2,3,4-tetrahydroquinoline hydrochloride (Rac-6h)

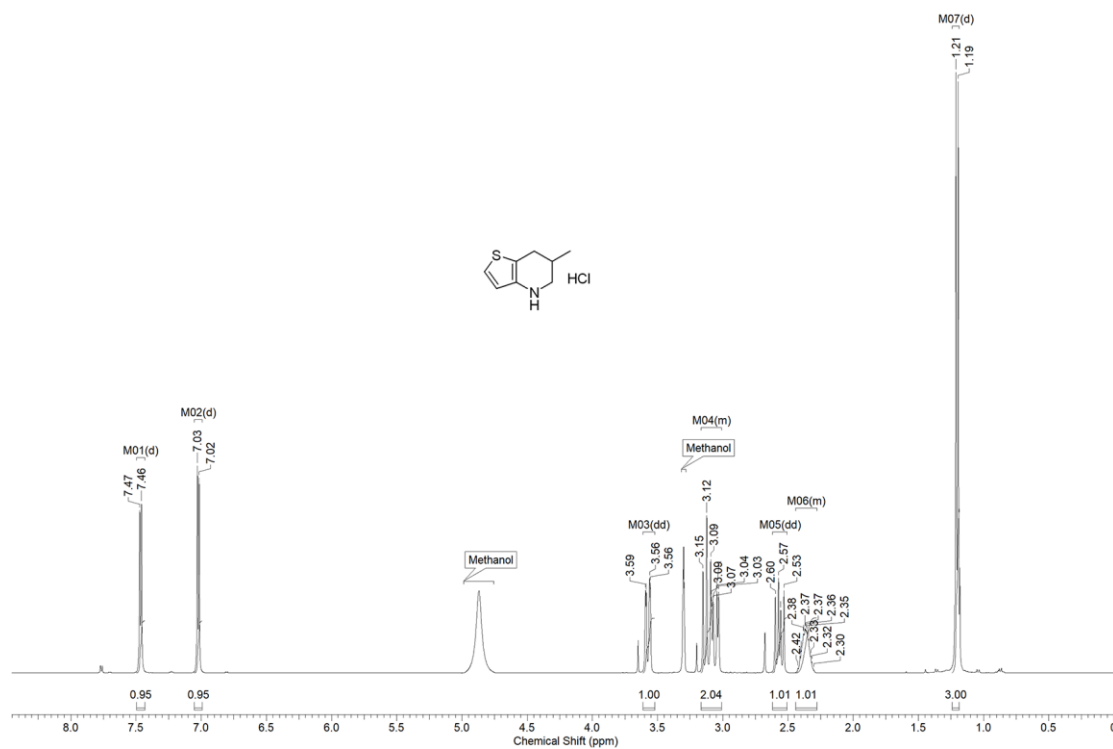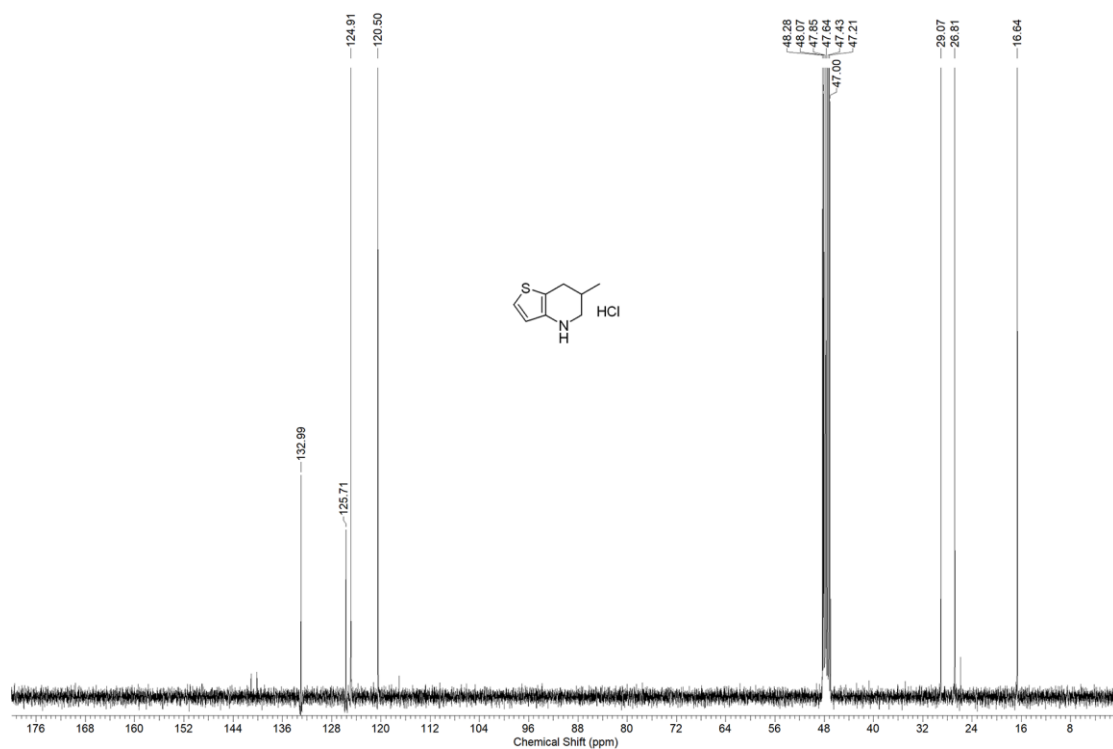

$^1\text{H-NMR}$  spectra and  $^{13}\text{C-NMR}$  spectra of  
6-methyl-4,5,6,7-tetrahydrothieno[3,2-b]pyridine (Rac-6i)

## S2.7 HPLC spectra

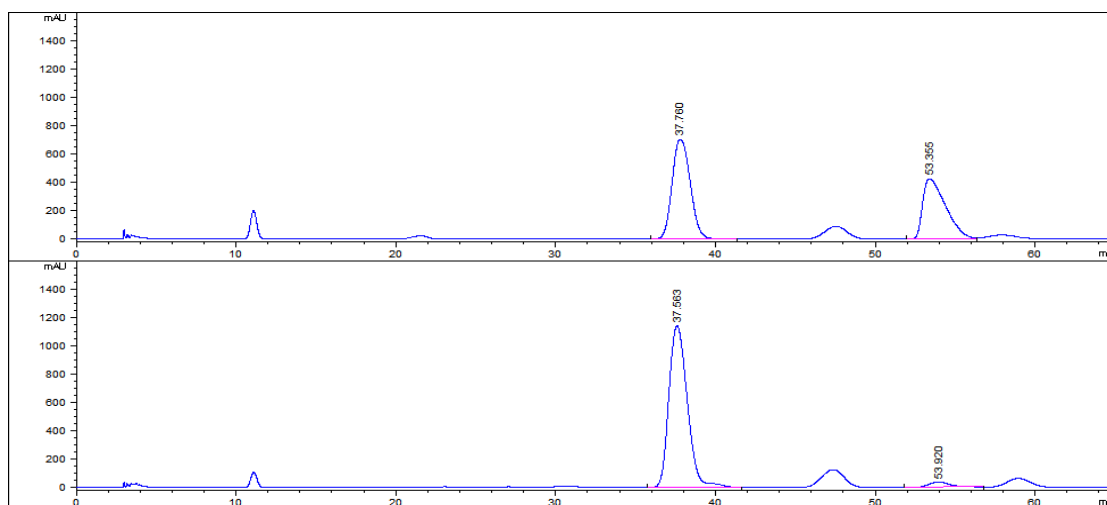

HPLC spectra of racemic **3a'** and enzymatic (*S*)-**3a'**

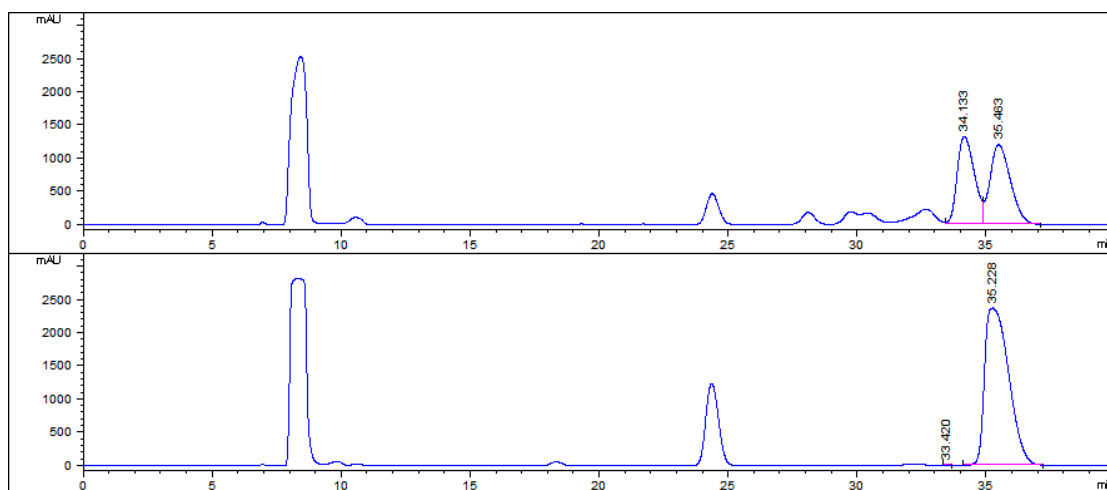

HPLC spectra of racemic **4a** and enzymatic (*S*)-**4a** derivatized with Fmoc N-hydroxysuccinimide.

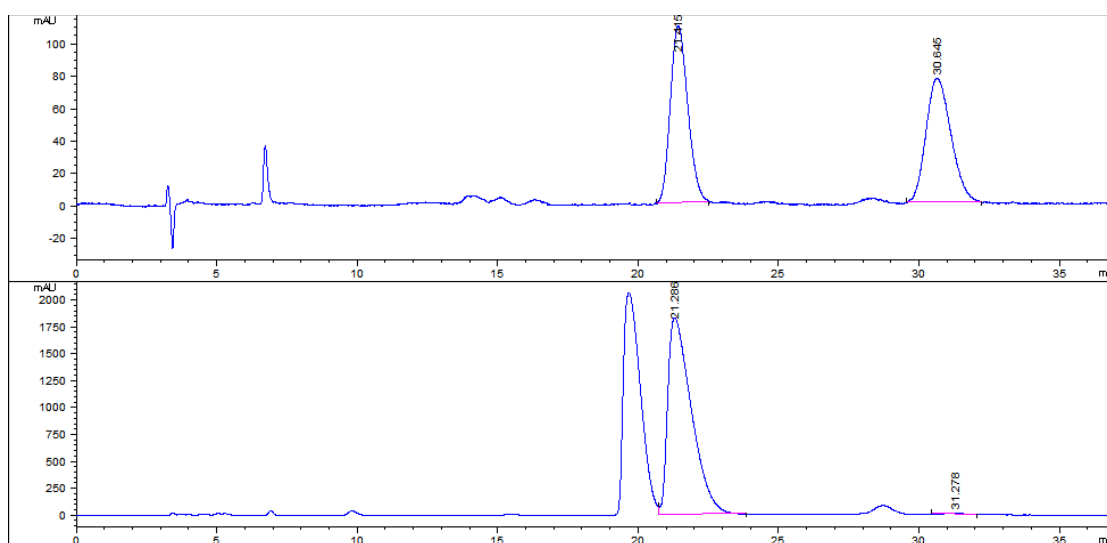

HPLC spectra of racemic **4b** and enzymatic (*S*)-**4b** derivatized with 4-nitrobenzene sulfonyl chloride.

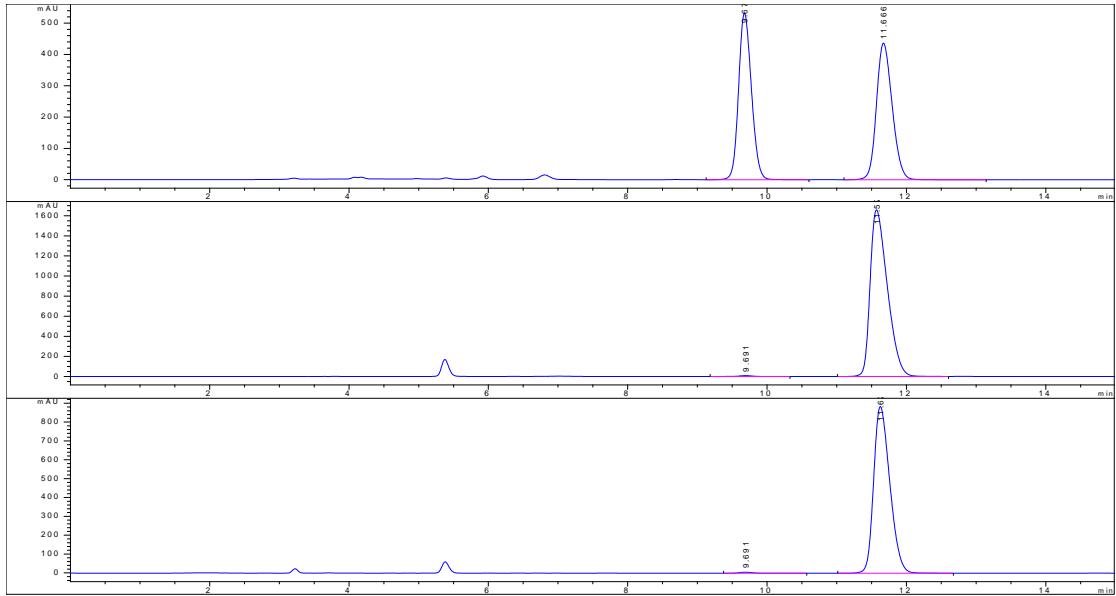

HPLC spectra of racemic **6a**, enzymatic (*S*)-**6a** from **4a** and enzymatic (*S*)-**6a** from **4b**

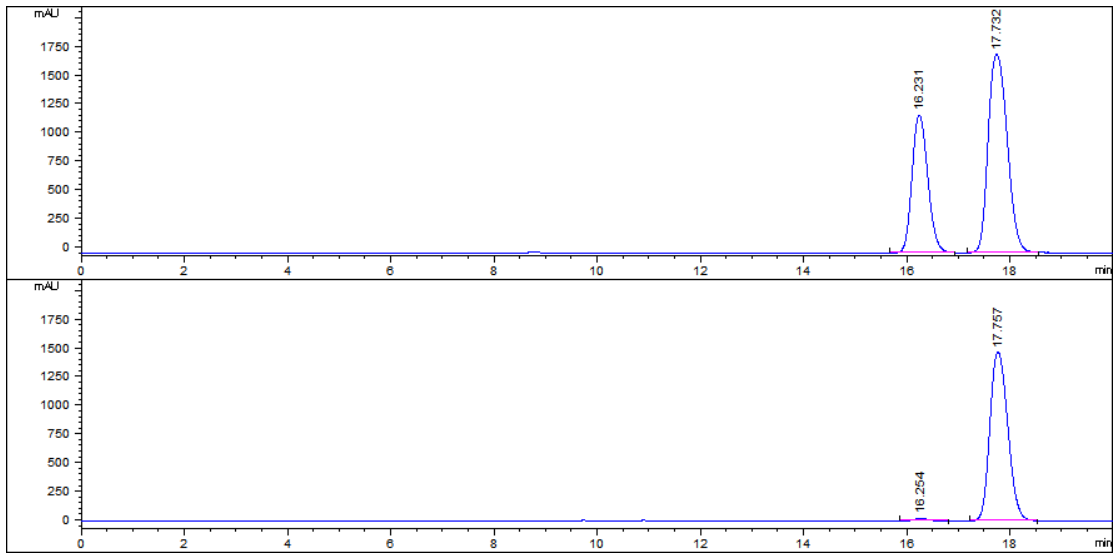

HPLC spectra of racemic **6c** and enzymatic (*S*)-**6c**

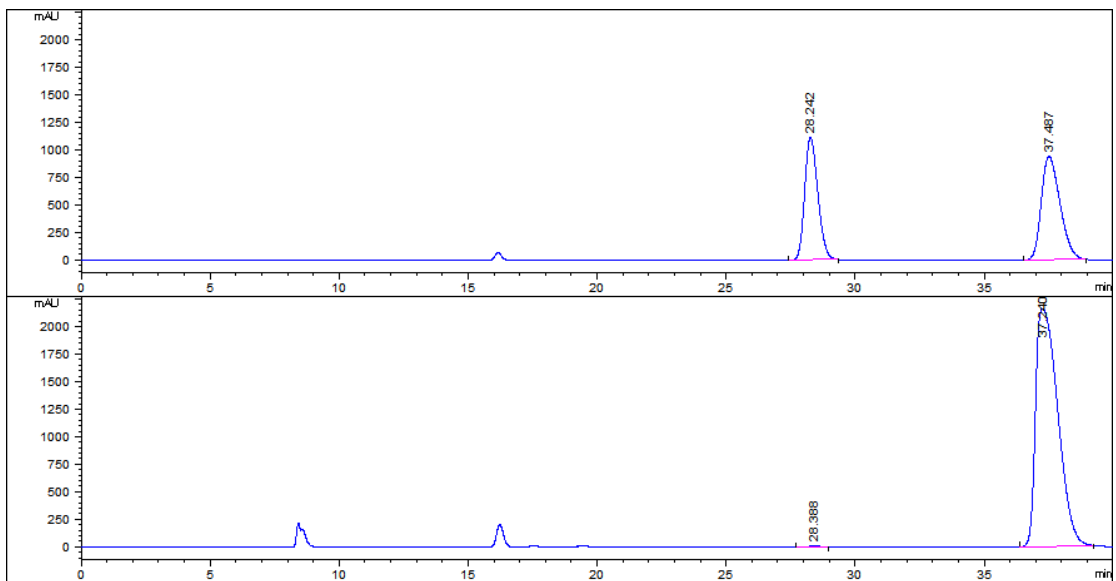

HPLC spectra of racemic **6d** and enzymatic (*S*)-**6d**

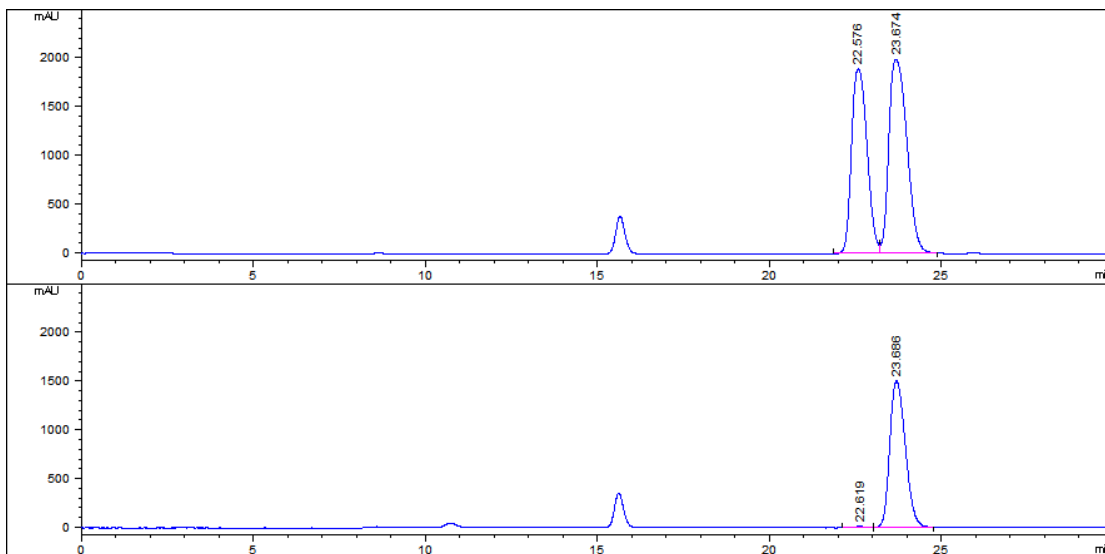

HPLC spectra of racemic **6e** and enzymatic (*S*)-**6e**

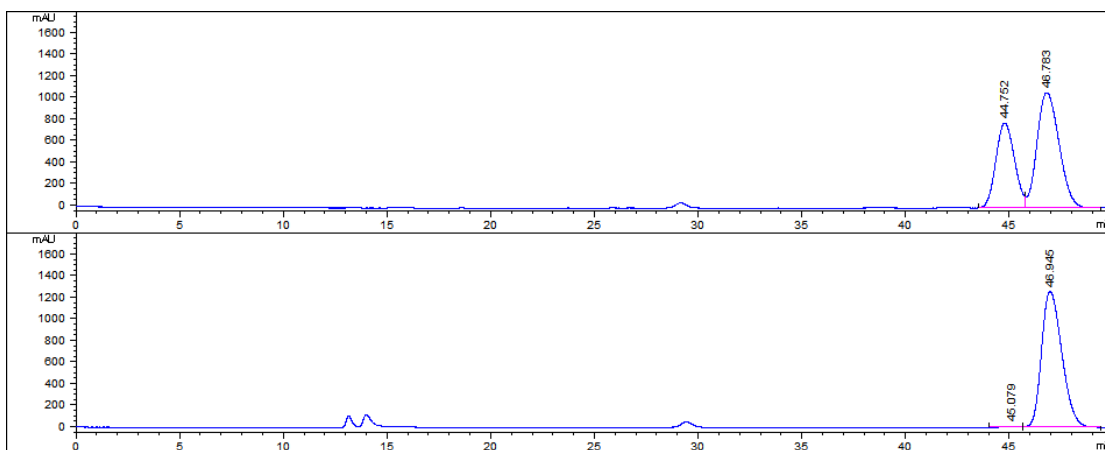

HPLC spectra of racemic **6f** and enzymatic (*S*)-**6f**

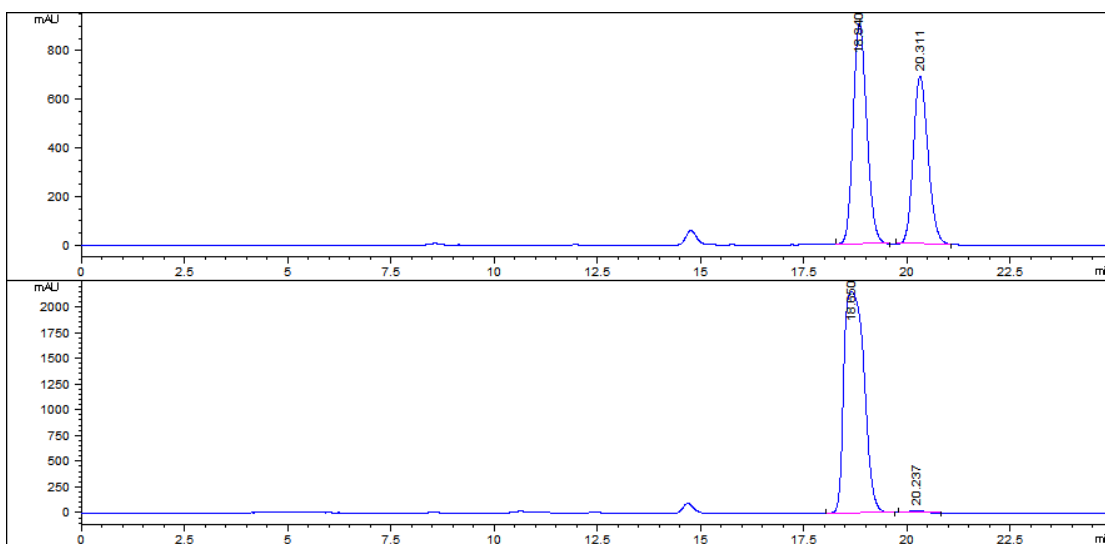

HPLC spectra of racemic **6g** and enzymatic (*S*)-**6g**

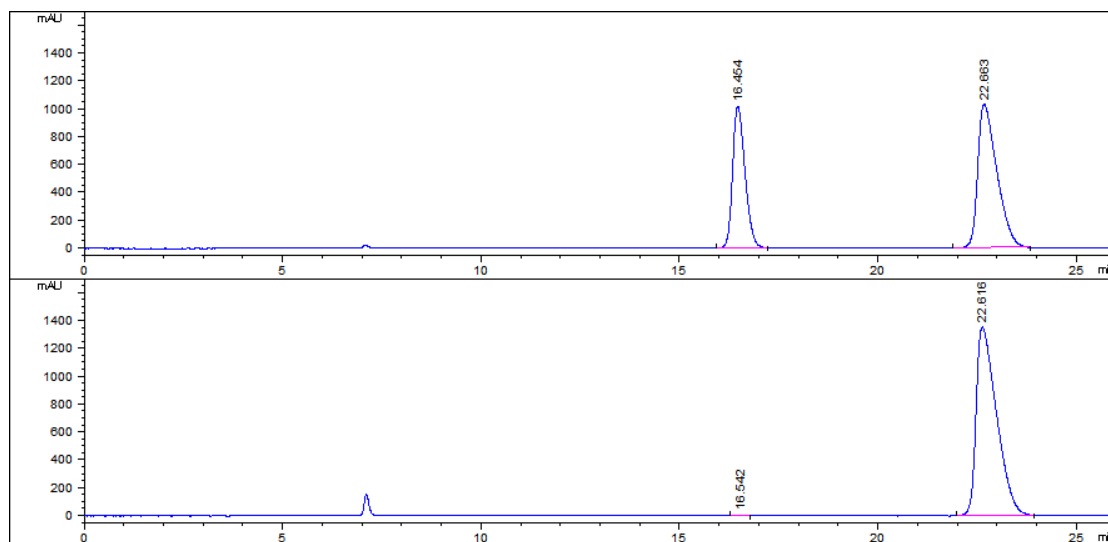

HPLC spectra of racemic **6h** and enzymatic (*S*)-**6h**

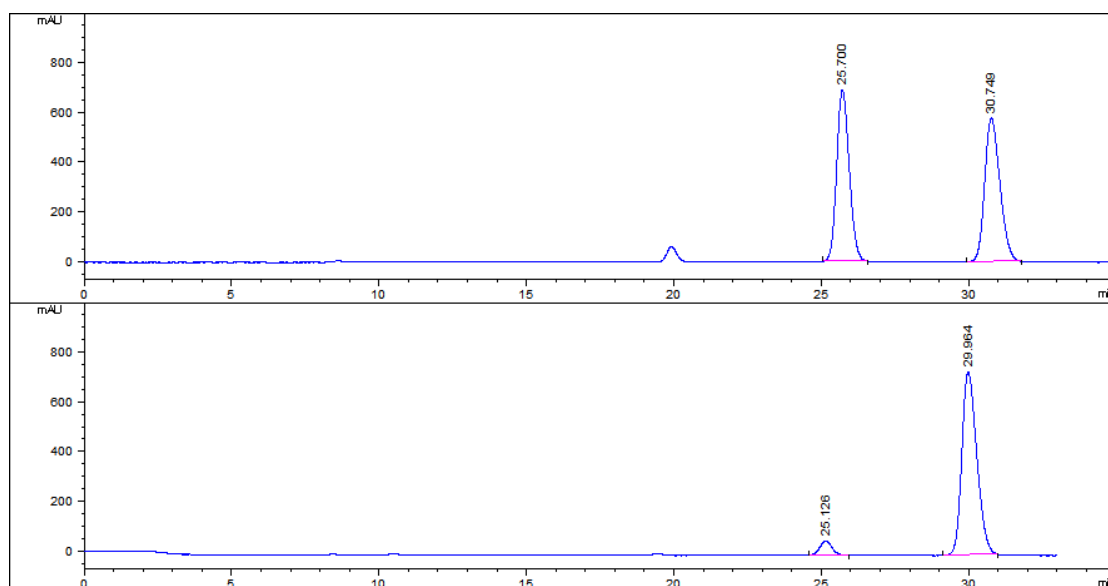

HPLC spectra of racemic **6i** and enzymatic (*S*)-**6i**

## S2.8 GC spectra

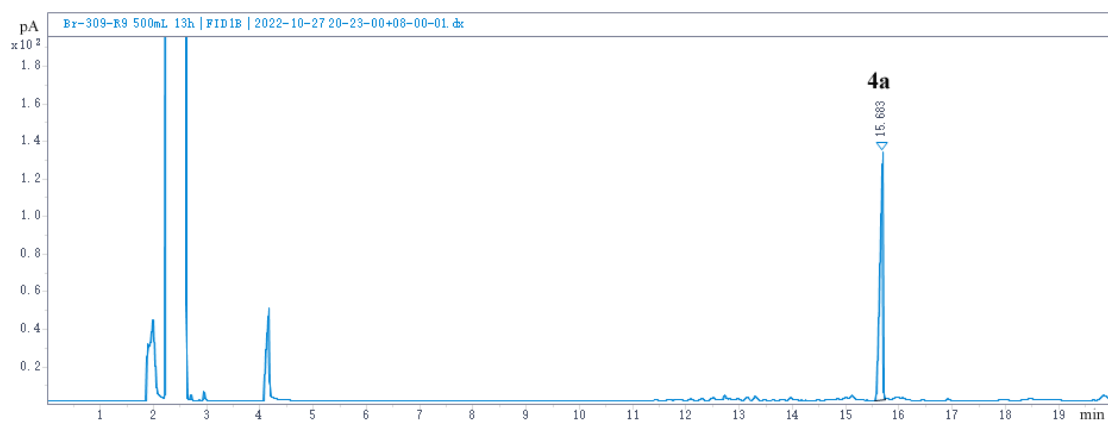

GC chromatograms of the preparative scale reaction (500 mL) crude product of **2a**.

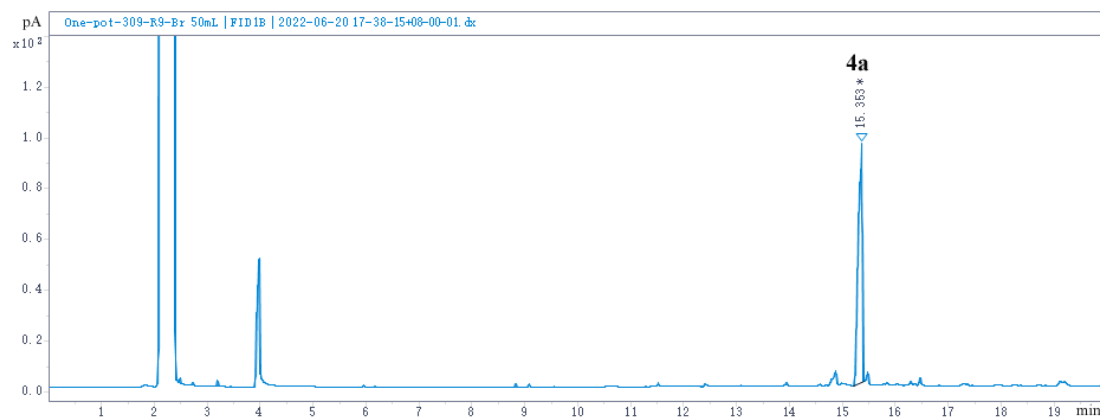

GC chromatograms of the preparative scale reaction (50 mL) crude product of **2a**.

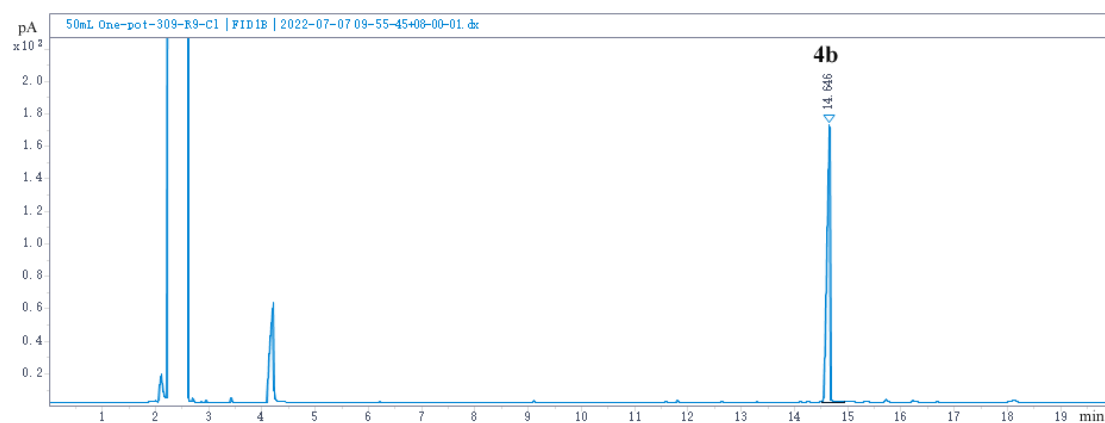

GC chromatograms of the preparative scale reaction (50 mL) crude product of **2b**.

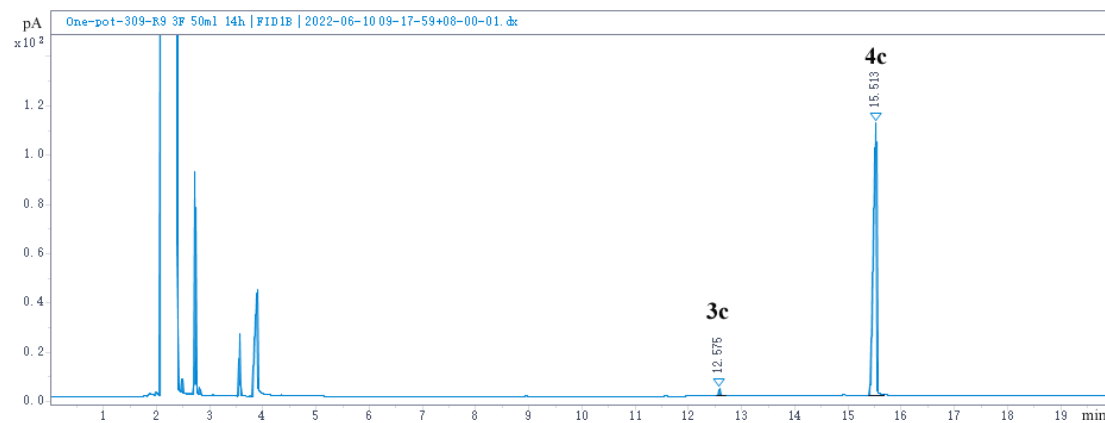

GC chromatograms of the preparative scale reaction (50 mL) crude product of **2c**.

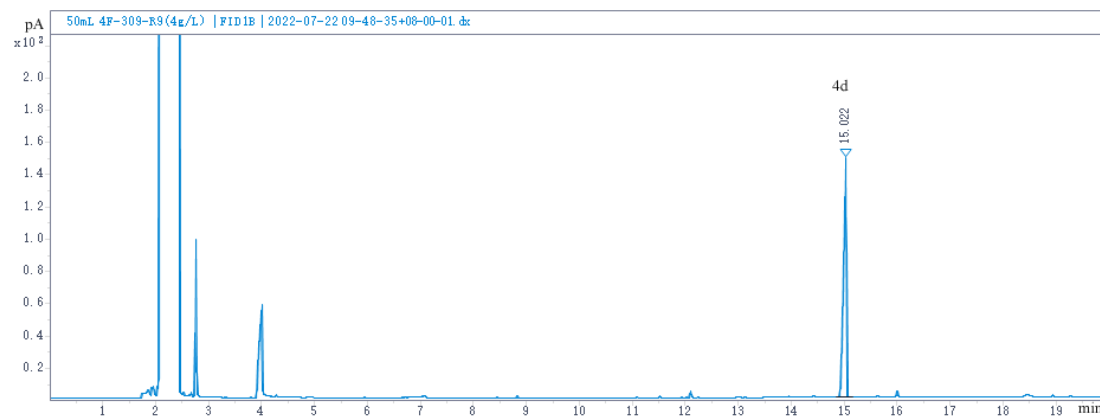



GC chromatograms of the preparative scale reaction (50 mL) crude product of **2d**.

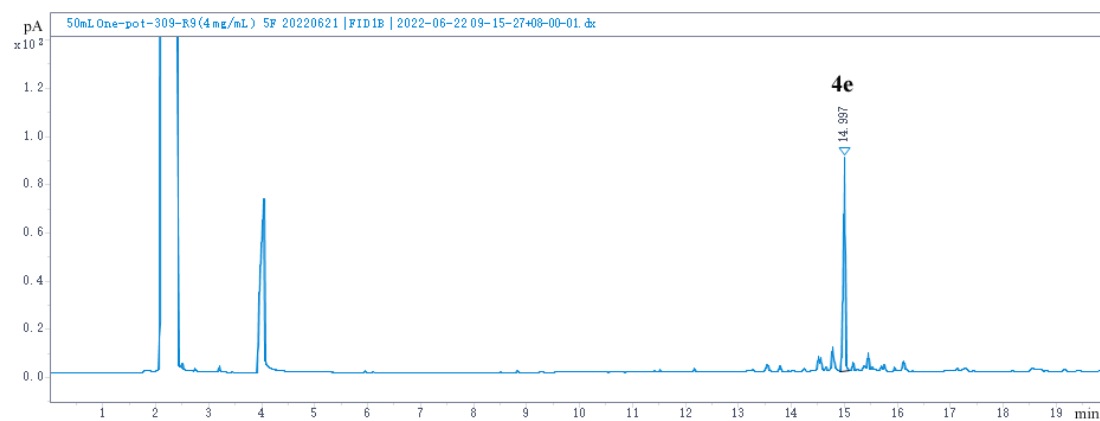

GC chromatograms of the preparative scale reaction (50 mL) crude product of **2e**.

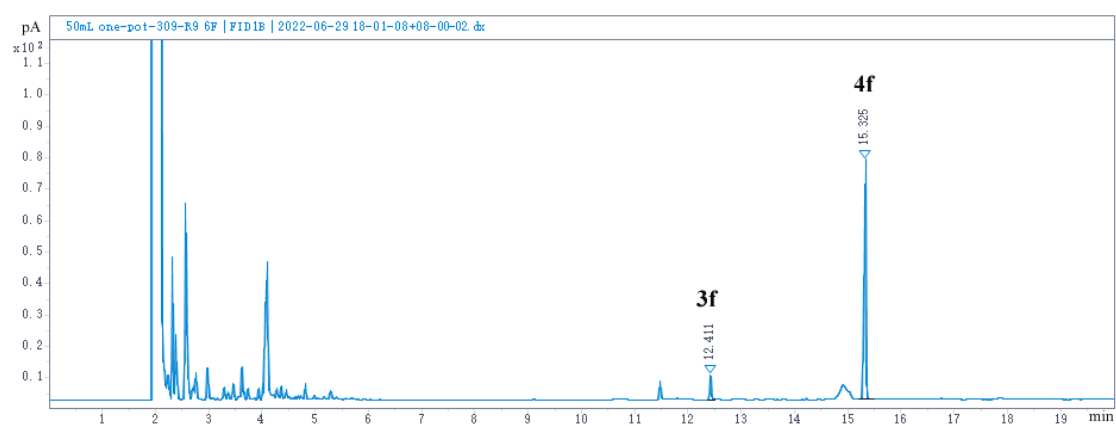

GC chromatograms of the preparative scale reaction (50 mL) crude product of **2f**.

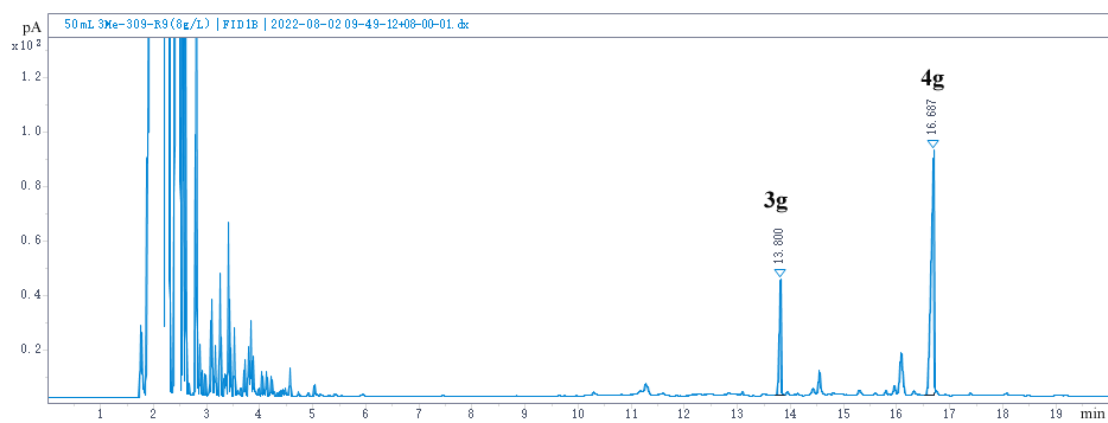

GC chromatograms of the preparative scale reaction (50 mL) crude product of **2g**.

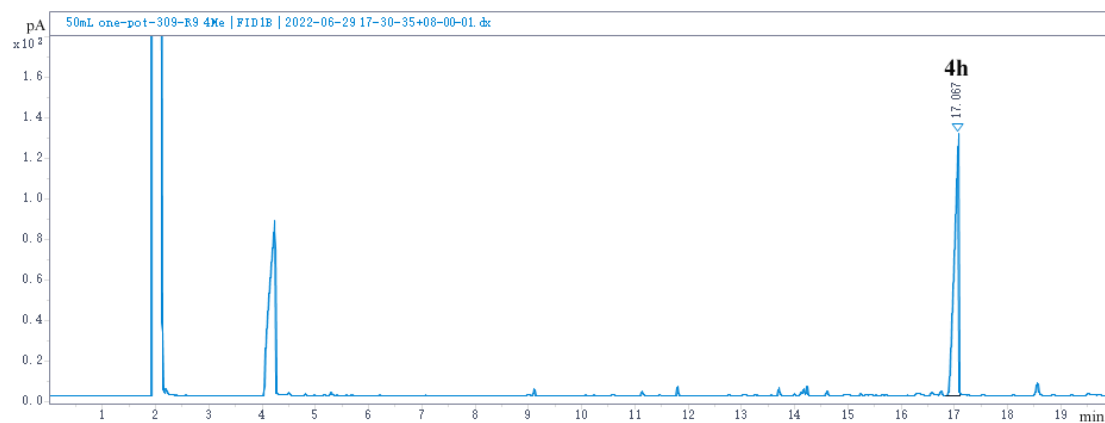

GC chromatograms of the preparative scale reaction (50 mL) crude product of **2h**.

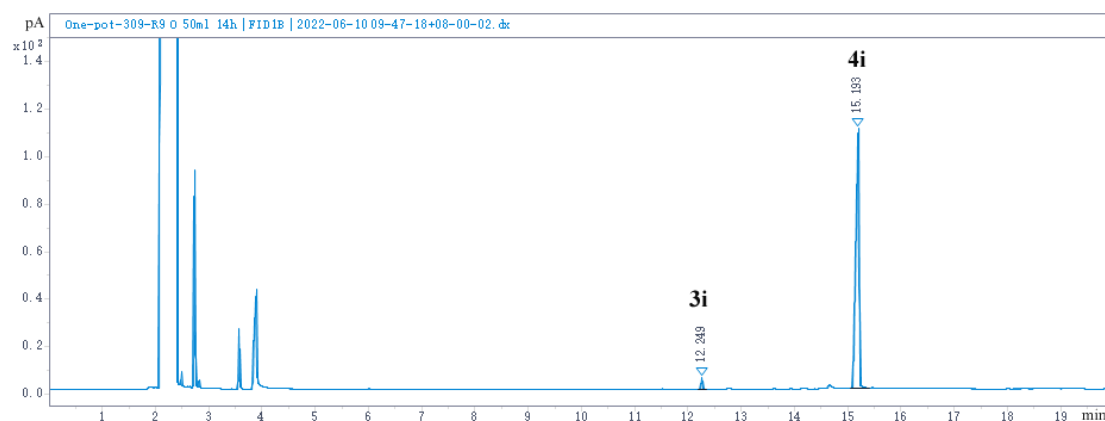

GC chromatograms of the preparative scale reaction (50 mL) crude product of **2i**.

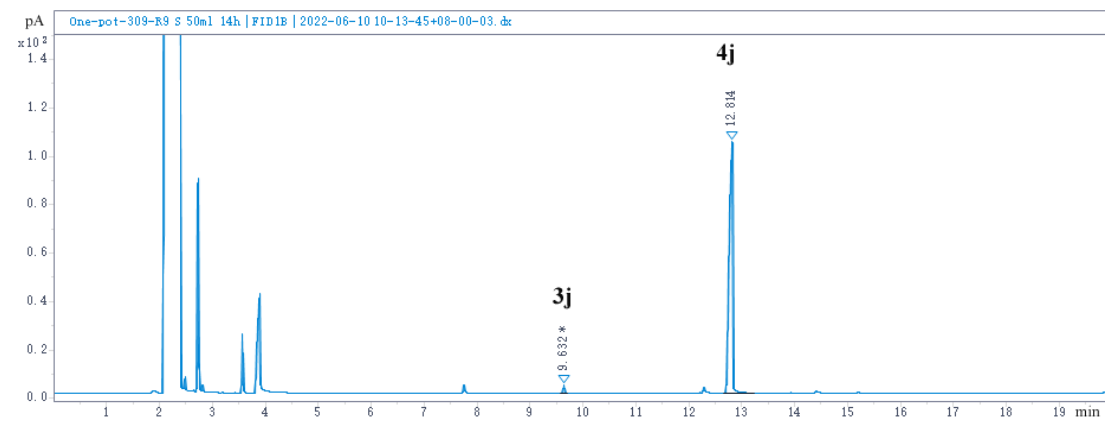

GC chromatograms of the preparative scale reaction (50 mL) crude product of **2j**.

### S3. References

- 1 C. Stueckler, N. J. Mueller, C. K. Winkler, S. M. Glueck, K. Gruber, G. Steinkellner, K. Faber, *Dalton Trans.* 2010, **39**, 8472-8476.
- 2 W. Li, W. Duo, C. Zhuang, *Org. Lett.* 2011, **13**, 3538-3541.
- 3 M. Li, Y. Cui, Z. Xu, X. Chen, J. Feng, M. Wang, P. Yao, Q. Wu, D. Zhu, *Adv. Synth. Catal.* 2022, **364**, 372-379.
- 4 Z. Xu, P. Yao, X. Sheng, J. Li, J. Li, S. Yu, J. Feng, Q. Wu, D. Zhu, *ACS Catal.* 2020, **10**, 8780-8787.
- 5 (a) P. Yao, P. Cong, R. Gong, J. Li, G. G. Li, J. Ren, J. Feng, J. Lin, P. C. K. Lau, Q. Wu, D. Zhu, *ACS Catal.* 2018, **8**, 1648-1652; (b) J. R. Marshall, P. Yao, S. L. Montgomery, J. D. Finnigan, T. W. Thorpe, R. B. Palmer, J. Mangas-Sanchez, R. A. M. Duncan, R. S. Heath, K. M. Graham, D. J. Cook, S. J. Charnock, N. J. Turner, *Nat. Chem.* 2021, **13**, 140-148.
- 6 Z. Zhan, Z. Xu, S. Yu, J. Feng, F. Liu, P. Yao, Q. Wu, D. Zhu, *Adv. Synth. Catal.* 2022, **364**, 2380-2386.
